# Supplementary material for: The inhibition of iridium-promoted water oxidation catalysis (WOC) by cucurbit[n]urils
Source: Royal Society of Chemistry journal article supplement (doi:10.1039/c2dt31363d), 2012-01-01
Supplement: c2dt31363d.pdf [file c2dt31363d.pdf]

# The inhibition of iridium-promoted water oxidation catalysis (WOC) by cucurbit[*n*]urils.

Wissam Iali,<sup>[a]</sup> Predrag Petrović,<sup>[a]</sup> Michel Pfeffer,<sup>[a]</sup> Stefan Grimme<sup>[b]</sup> and Jean-Pierre Djukic\*<sup>[a]</sup>

## Electronic Supporting Information

---

[a] Dr J.P. Djukic, Dr M. Pfeffer, W. Iali, P. Petrović  
Institut de Chimie de Strasbourg (UMR 7177 CNRS/UdS)  
University of Strasbourg  
4 rue Blaise Pascal, F-67000 Strasbourg, France  
Fax: (+33) 036885001  
E-mail: djukic@unistra.fr

[b] Prof. Dr S. Grimme  
Mulliken Center for Theoretical Chemistry  
University of Bonn  
Berlingstr. 4, D-53115 Bonn, Germany

## Content

1. Relationship between the measured saturation and the molar amount of produced O<sub>2</sub> gas. 4
2. Relationship between  $n_{\text{O}_2}$  (probe) and  $n_{\text{O}_2}$ (volumetry) 4
3. Effect of acetonitrile on WOC efficiency. 5
4. KMnO<sub>4</sub> as a sacrificial oxidant 6
5. Lack of interaction between CB[7] and 1c 7
6. <sup>1</sup>H NMR spectrum in D<sub>2</sub>O of the WOC reaction medium after 30 min of reaction time with 1a as catalyst. 8
7. Infrared spectroscopy on CB[7] under exposure to Ir catalysts. 9
8. WOC 10
9. Partial structure of complex 1c 13
10. UV-vis spectroscopic monitoring of exposure of CB[6] and CB[7] to CAN 24
11. <sup>1</sup>H NMR spectrum of CB[6] after treatment with CAN and catalyst 3 in the conditions of WOC. 25
12. Calorimetric titrations 26
13. Interaction of IrCp\*(H<sub>2</sub>O)<sub>3</sub>(PF<sub>6</sub>)<sub>2</sub> with CB[7] in water 31
14. Computational material 32
  - Cp\*Ir(H<sub>2</sub>O)<sub>3</sub><sup>2+</sup>, gas phase 33*
  - CB7, gas phase. 37*
  - host-guest complex gas phase 45*
  - CB[7]•[Cp\*Ir(H<sub>2</sub>O)]<sup>2+</sup> 55*
  - H<sub>2</sub>O 58*
  - CB7, COSMO 60*
  - Cp\*Ir(H<sub>2</sub>O)<sub>3</sub>Cl<sub>2</sub> – 1, COSMO 63*
  - Cp\*Ir(H<sub>2</sub>O)<sub>3</sub>Cl<sub>2</sub> – 2, COSMO 66*
  - Cp\*Ir(H<sub>2</sub>O)<sub>3</sub>Cl<sub>2</sub>–3, COSMO 70*
  - host-guest, Cl<sub>2</sub>, COSMO 73*
  - Cp\*Ir(H<sub>2</sub>O)<sub>2</sub>(O)<sup>2+</sup>, gas phase 77*
  - host-guest Cp\*Ir(H<sub>2</sub>O)<sub>2</sub>(O)<sup>2+</sup>, gas phase 82*
  - host-guest Cp\*Ir(H<sub>2</sub>O)<sub>2</sub>(O)<sup>2+</sup>, gas phase 86*

## Experimental setup for the production of O<sub>2</sub>

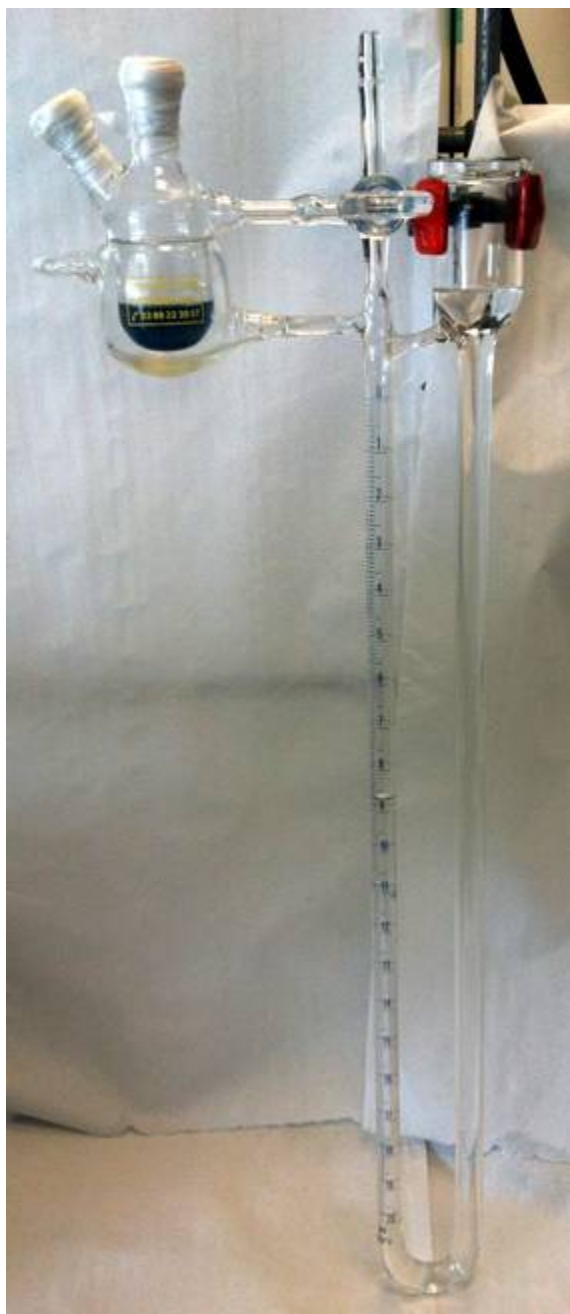

**Figure 1.** The volumetric glass vessel used in this study. The O<sub>2</sub> galvanometric probe was fixed to the top ground joint via a Teflon adaptor.

## 1. Relationship between the measured saturation and the molar amount of produced O<sub>2</sub> gas.

$n_{O_2}$ : number of moles of O<sub>2</sub> gas released in the overhead volume  $v$  or pure Ar gas.

$V_{tot}$ , the total isotherm volume of the overhead gas mixture at any  $t$  time is always defined by  $V_{tot} = v + V_{O_2}$ . Isobaric conditions were checked by using a light silicon oil to fill the U-shaped glass part.

The isotherm and isobaric molar fraction of O<sub>2</sub> gas  $x$  of the gas mixture is defined by

$$x = V_{O_2} / V_{tot} = V_{O_2} / (v + V_{O_2})$$

which leads to  $V_{O_2}(1-x) = vx$  and hence to  $V_{O_2} = vx / (1-x)$

Assuming an idealized behaviour of the gas mixture (that also applies to the volumetric method) one obtains the number of O<sub>2</sub> moles in the gas overhead mixture as a function of  $x$ .

$$n_{O_2} = (P/RT)[vx / (1-x)]$$

## 2. Relationship between $n_{O_2}$ (probe) and $n_{O_2}$ (volumetry)

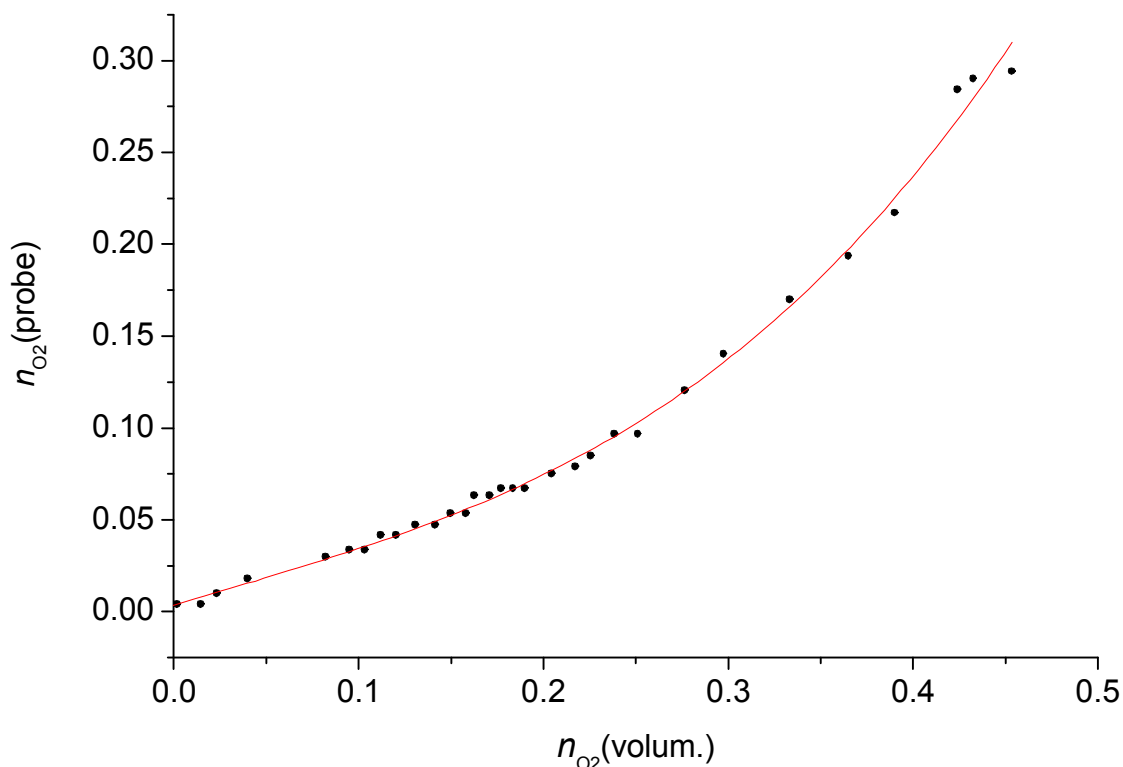

**Figure 2.** This curve was established by carrying out a typical WOC reaction using complex **1b**. The values of  $n_{O_2}$  determined by the volumetric method and by conversion of oxygen saturation  $x$  readout were subsequently fitted against a polynomial 3<sup>rd</sup> order function ( $n_{O_2}(\text{probe}) = a + b \times n_{O_2}(\text{volum.}) + c \times n_{O_2}(\text{volum.})^2 + d \times n_{O_2}(\text{volum.})^3$ ;  $a = 0.003(3)$ ,  $b = 0.30(6)$ ,  $c = -0.2(3)$ ,  $d = 2.2(5)$ ;  $R^2 = 0.99$ ) to demonstrate the non-linearity of probe's measures.

### 3. Effect of acetonitrile on WOC efficiency.

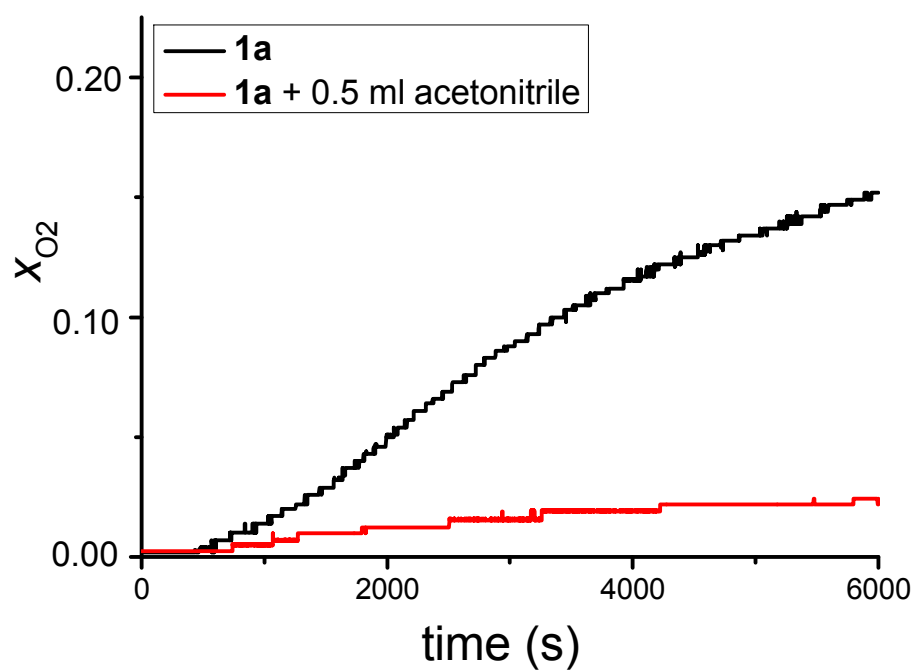

**Figure 3.** Oxygen evolution traces recorded for a typical WOC experiment carried out without (black plot) and with (red plot) acetonitrile (0.5 mL) in the presence of metallacycle **1a**. Under the latter condition the maximum saturation in  $O_2$  reaches barely 2 %.

#### 4. $\text{KMnO}_4$ as a sacrificial oxidant

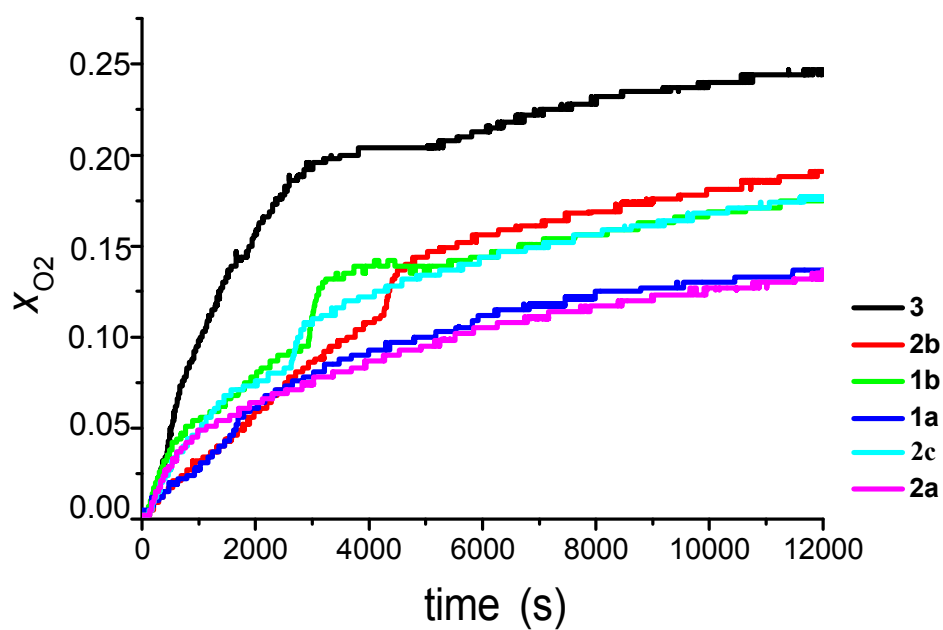

**Figure 4.** Oxygen evolution traces for complex **1a-3** as measured by sensor oxygen;  $[\text{KMnO}_4] = 0.166 \text{ M}$ ,  $V = 5 \text{ ml}$ ,  $n(\text{H}^+) = 3 \text{ M}$ ,  $n(\text{Ir}) = 0.0125 \text{ mmol}$

## 5. Lack of interaction between CB[7] and 1c

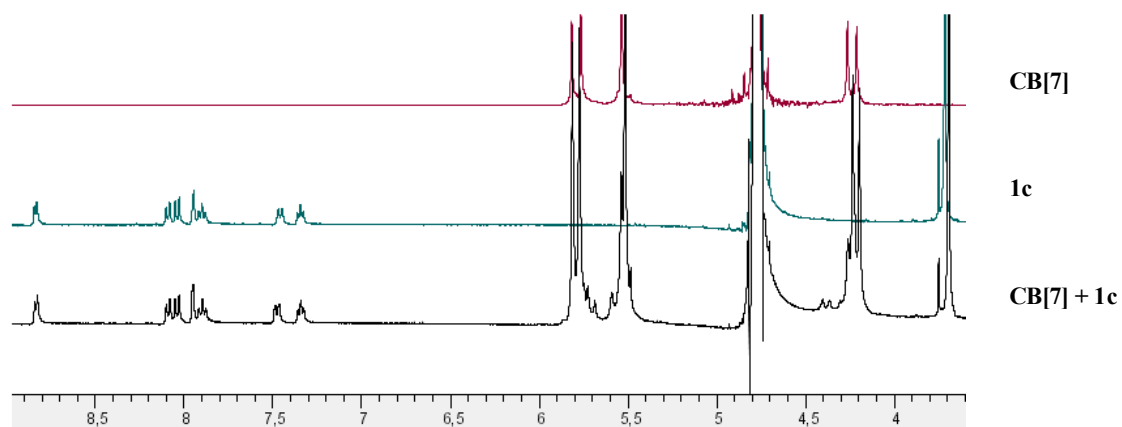

**Figure 5:** <sup>1</sup>H NMR (400 MHz) in D<sub>2</sub>O for 1c + CB[7] at room temperature.

6.  $^1\text{H}$  NMR spectrum in  $\text{D}_2\text{O}$  of the WOC reaction medium after 30 min of reaction time with 1a as catalyst.

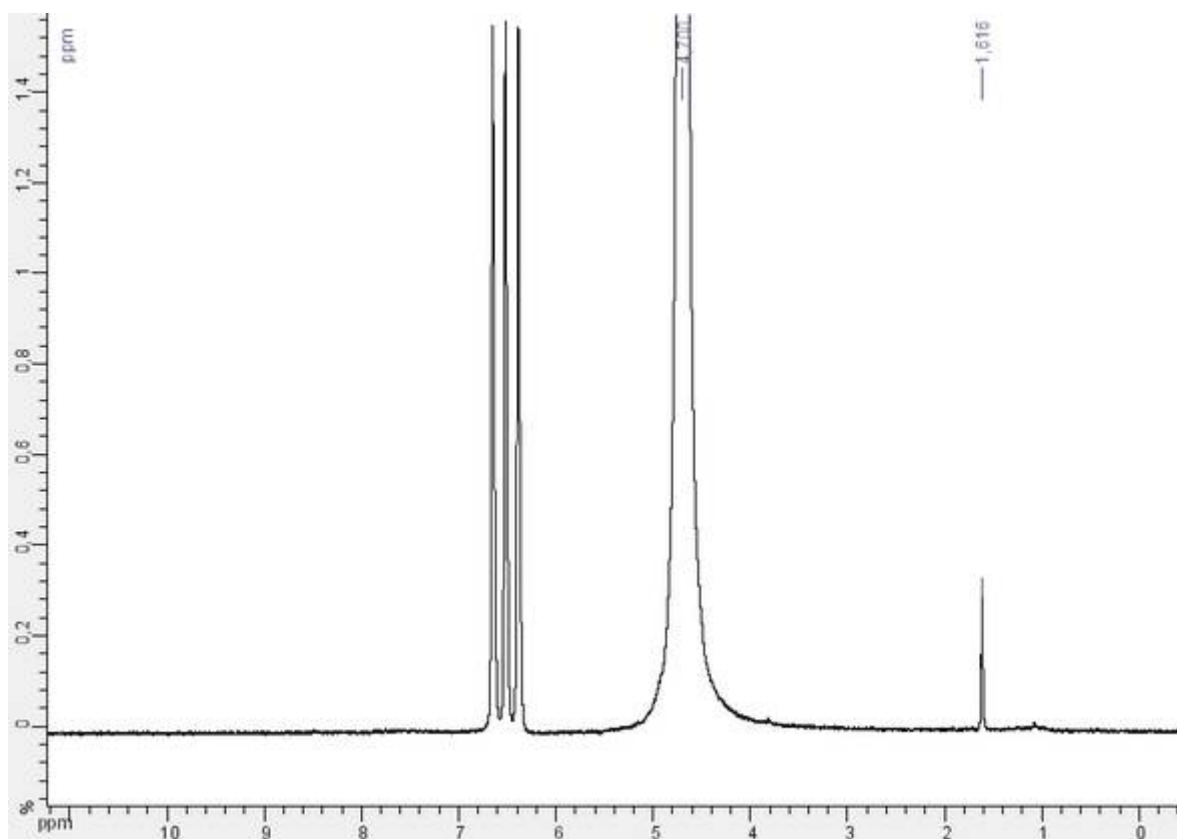

Figure 5. The signal at 1.64 ppm is indicative of the presence of a dissolved “Cp\*Ir” moiety.



## 7. Infrared spectroscopy on CB[7] under exposure to Ir catalysts.

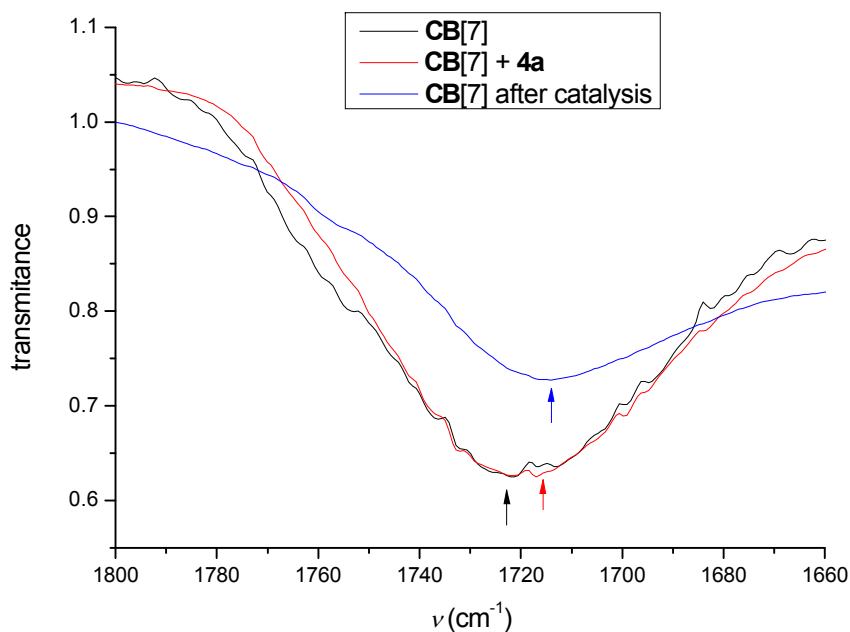

**Figure 6.** Plot of the elongation vibrational band for the C=O function in **CB[7]** in three situations: in the neat solid material, upon exposure to **4a** and upon WOC run initiated with complex **3**. In the latter situation, the initial dark blue solution was first treated with  $n\text{Bu}_3\text{P}(\text{O})$  in toluene to remove cerium salts and the resulting aqueous solution was treated with acetone to precipitate the insoluble material containing **CB[7]** and other inorganic salts. Spectra were measured on an ATR cell.

## 8. WOC

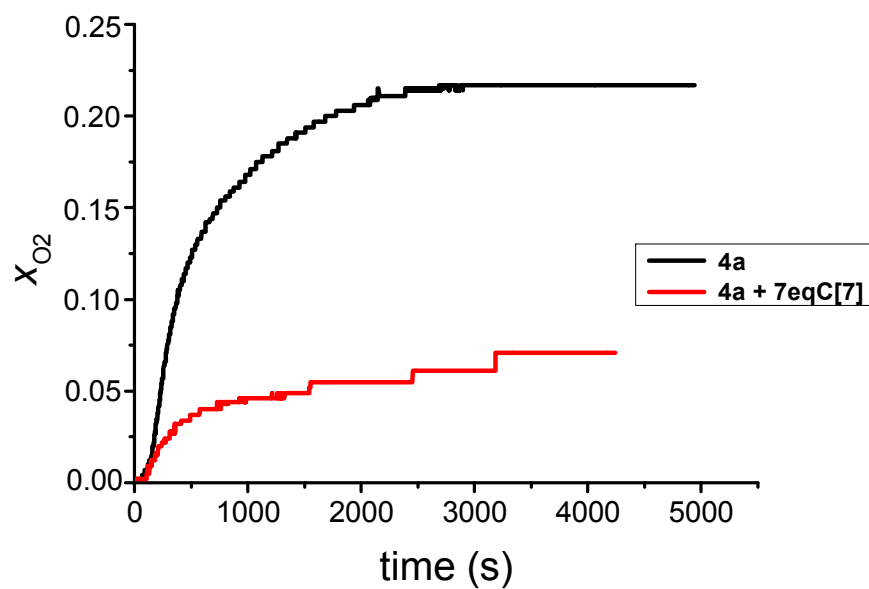

**Figure 6.** The effect of **CB[7]** on the production of oxygen catalysis by **4a**; the oxygen evolution was monitored with gas galvanometric sensor;  $[CAN] = 0.5 \text{ M}$   $V = 5 \text{ ml}$ ,  $n(\text{Ir}) = 0.0125 \text{ mmol}$ ,  $n(\text{CB}[7]) = 0.0875 \text{ mmol}$

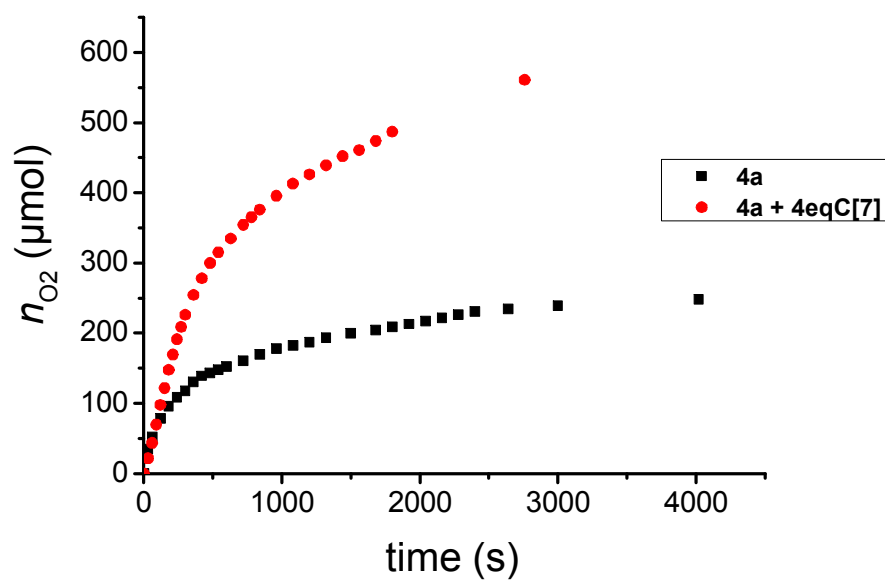

**Figure 7.** The effect of CB[7] on the production of  $\text{O}_2$  catalysed by **4a** ; oxygen evolution was determined by the volumetric method;  $[\text{CAN}] = 0.5 \text{ M}$   $V = 5 \text{ ml}$ ,  $n(\text{Ir}) = 0.0125 \text{ mmol}$ ,  $n(\text{CB}[7]) = 0.05 \text{ mmol}$

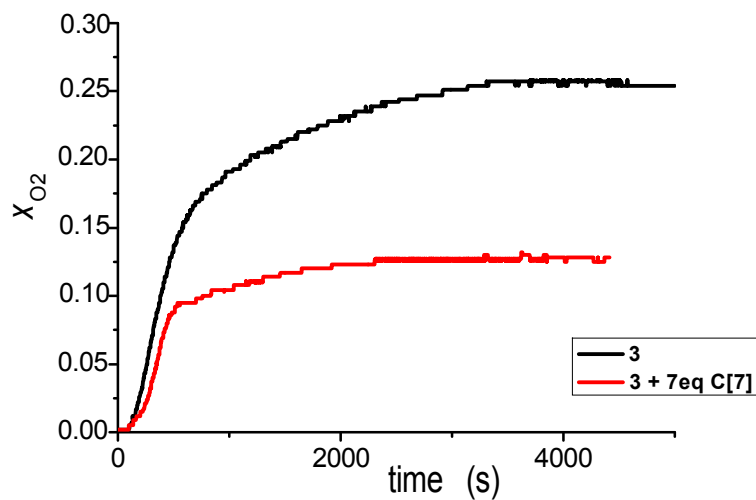

**Figure 9.** The effect of CB[7] on the production of oxygen catalysed by **3**; O<sub>2</sub> sensor monitoring; [CAN] = 0.5 M, V = 5 ml,  $n(\text{Ir}) = 0.0125$  mmol,  $n(\text{CB}[7]) = 0.0875$  mmol

## 9. Partial structure of complex 1c

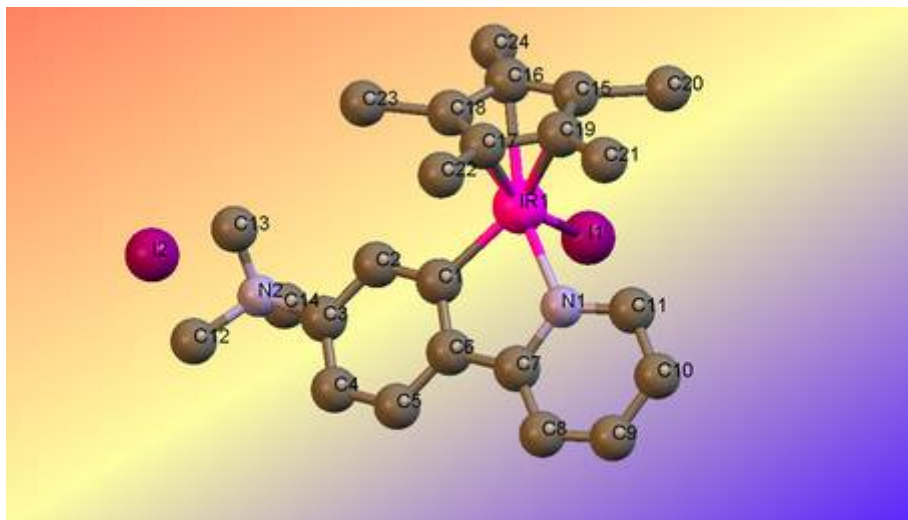

**Figure 7.** Ball and sticks diagram of the structure of 1c.

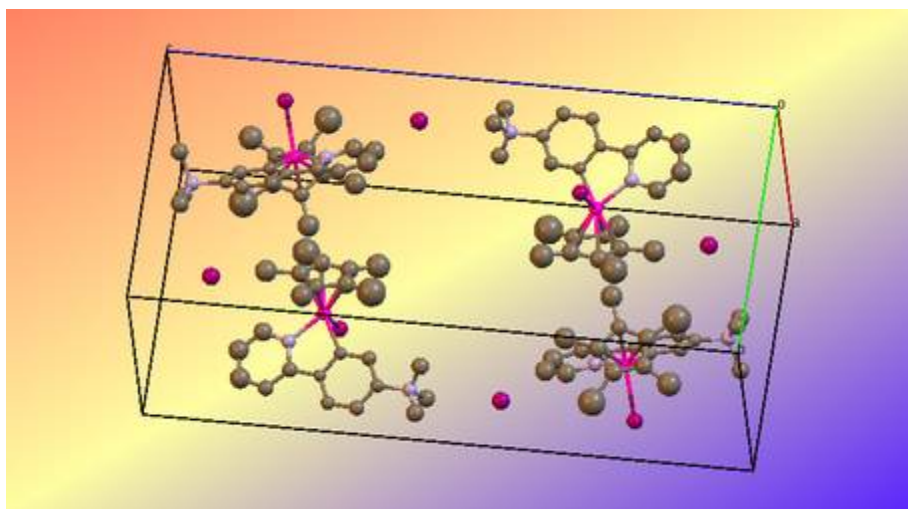

**Figure 8.** View of the unit cell of the crystal lattice.

## List of geometrical parameters for the partial structure of 1c.

### Atomic coordinates (lacking the H atoms at aromatic rings)

| Number | Label | Charge | SybylType | Xfrac + ESD | Yfrac + ESD | Zfrac + ESD | Symm. op.        |
|--------|-------|--------|-----------|-------------|-------------|-------------|------------------|
| 1      | Ir1   | 0      | Ir        | 0.62457     | 0.798       | 0.212526    | x,y,z            |
| 2      | I1    | 0      | I         | 0.922365    | 0.880405    | 0.199739    | x,y,z            |
| 3      | N2    | 0      | N.4       | 0.763516    | 0.587828    | 0.061749    | x,y,z            |
| 4      | C1    | 0      | C.3       | 0.730057    | 0.692886    | 0.181673    | x,y,z            |
| 5      | C2    | 0      | C.2       | 0.711769    | 0.674556    | 0.133035    | x,y,z            |
| 6      | C3    | 0      | C.2       | 0.78014     | 0.599773    | 0.116664    | x,y,z            |
| 7      | C4    | 0      | C.2       | 0.866799    | 0.543321    | 0.148931    | x,y,z            |
| 8      | C5    | 0      | C.2       | 0.885089    | 0.561651    | 0.197569    | x,y,z            |
| 9      | C6    | 0      | C.2       | 0.816719    | 0.636433    | 0.213941    | x,y,z            |
| 10     | C7    | 0      | C.2       | 0.836809    | 0.658352    | 0.264872    | x,y,z            |
| 11     | C8    | 0      | C.2       | 0.922763    | 0.616161    | 0.303946    | x,y,z            |
| 12     | C9    | 0      | C.2       | 0.940545    | 0.654447    | 0.348721    | x,y,z            |
| 13     | C10   | 0      | C.2       | 0.872375    | 0.734922    | 0.354421    | x,y,z            |
| 14     | C11   | 0      | C.2       | 0.786421    | 0.777113    | 0.315347    | x,y,z            |
| 15     | N1    | 0      | N.2       | 0.768637    | 0.738829    | 0.270573    | x,y,z            |
| 16     | C12   | 0      | C.3       | 0.769198    | 0.499279    | 0.047953    | x,y,z            |
| 17     | H12A  | 0      | H         | 0.650745    | 0.475217    | 0.046194    | x,y,z            |
| 18     | H12B  | 0      | H         | 0.847002    | 0.468185    | 0.071759    | x,y,z            |
| 19     | H12C  | 0      | H         | 0.813679    | 0.494731    | 0.016605    | x,y,z            |
| 20     | C13   | 0      | C.3       | 0.604032    | 0.611458    | 0.042442    | x,y,z            |
| 21     | H13A  | 0      | H         | 0.61324     | 0.637696    | 0.011208    | x,y,z            |
| 22     | H13B  | 0      | H         | 0.554456    | 0.652293    | 0.063576    | x,y,z            |
| 23     | H13C  | 0      | H         | 0.527468    | 0.561711    | 0.038386    | x,y,z            |
| 24     | C14   | 0      | C.3       | 0.925703    | 0.635397    | 0.04227     | x,y,z            |
| 25     | H14A  | 0      | H         | 0.919647    | 0.628592    | 0.007478    | x,y,z            |
| 26     | H14B  | 0      | H         | 1.03576     | 0.611063    | 0.057217    | x,y,z            |
| 27     | H14C  | 0      | H         | 0.921241    | 0.69573     | 0.050159    | x,y,z            |
| 28     | C15   | 0      | C.3       | 0.44528     | 0.91474     | 0.220554    | x,y,z            |
| 29     | C16   | 0      | C.3       | 0.423826    | 0.888461    | 0.171977    | x,y,z            |
| 30     | C18   | 0      | C.3       | 0.36813     | 0.802682    | 0.170618    | x,y,z            |
| 31     | C17   | 0      | C.3       | 0.355162    | 0.775945    | 0.218356    | x,y,z            |
| 32     | C19   | 0      | C.3       | 0.402844    | 0.8452      | 0.249218    | x,y,z            |
| 33     | C20   | 0      | C.3       | 0.541886    | 0.998089    | 0.252927    | x,y,z            |
| 34     | H20A  | 0      | H         | 0.618474    | 1.02916     | 0.233201    | x,y,z            |
| 35     | H20B  | 0      | H         | 0.611561    | 0.976396    | 0.281575    | x,y,z            |
| 36     | H20C  | 0      | H         | 0.450576    | 1.03613     | 0.26242     | x,y,z            |
| 37     | C21   | 0      | C.3       | 0.375666    | 0.830051    | 0.303724    | x,y,z            |
| 38     | H21A  | 0      | H         | 0.429715    | 0.876549    | 0.323105    | x,y,z            |
| 39     | H21B  | 0      | H         | 0.4307      | 0.776421    | 0.3145      | x,y,z            |
| 40     | H21C  | 0      | H         | 0.249786    | 0.827819    | 0.307253    | x,y,z            |
| 41     | C22   | 0      | C.3       | 0.268908    | 0.694183    | 0.23347     | x,y,z            |
| 42     | H22A  | 0      | H         | 0.159121    | 0.684751    | 0.212937    | x,y,z            |
| 43     | H22B  | 0      | H         | 0.243815    | 0.699022    | 0.266844    | x,y,z            |
| 44     | H22C  | 0      | H         | 0.348575    | 0.64644     | 0.230304    | x,y,z            |
| 45     | C23   | 0      | C.3       | 0.299884    | 0.748165    | 0.123879    | x,y,z            |
| 46     | H23A  | 0      | H         | 0.286836    | 0.78531     | 0.095805    | x,y,z            |
| 47     | H23B  | 0      | H         | 0.186207    | 0.722526    | 0.128331    | x,y,z            |
| 48     | H23C  | 0      | H         | 0.385105    | 0.703505    | 0.119075    | x,y,z            |
| 49     | C24   | 0      | C.3       | 0.464779    | 0.933164    | 0.128653    | x,y,z            |
| 50     | H24A  | 0      | H         | 0.545163    | 0.980124    | 0.137628    | x,y,z            |
| 51     | H24B  | 0      | H         | 0.356199    | 0.955328    | 0.11159     | x,y,z            |
| 52     | H24C  | 0      | H         | 0.520285    | 0.893848    | 0.10785     | x,y,z            |
| 53     | Ir1   | 0      | Ir        | 0.37543     | 0.298       | 0.287474    | 1-x,-1/2+y,1/2-z |
| 54     | I1    | 0      | I         | 0.077635    | 0.380405    | 0.300261    | 1-x,-1/2+y,1/2-z |
| 55     | N2    | 0      | N.4       | 0.236484    | 0.087828    | 0.438251    | 1-x,-1/2+y,1/2-z |
| 56     | C1    | 0      | C.3       | 0.269943    | 0.192886    | 0.318327    | 1-x,-1/2+y,1/2-z |
| 57     | C2    | 0      | C.2       | 0.288231    | 0.174556    | 0.366965    | 1-x,-1/2+y,1/2-z |
| 58     | C3    | 0      | C.2       | 0.21986     | 0.099773    | 0.383336    | 1-x,-1/2+y,1/2-z |
| 59     | C4    | 0      | C.2       | 0.133201    | 0.043321    | 0.351069    | 1-x,-1/2+y,1/2-z |
| 60     | C5    | 0      | C.2       | 0.114911    | 0.061651    | 0.302431    | 1-x,-1/2+y,1/2-z |
| 61     | C6    | 0      | C.2       | 0.183281    | 0.136433    | 0.286059    | 1-x,-1/2+y,1/2-z |
| 62     | C7    | 0      | C.2       | 0.163191    | 0.158352    | 0.235128    | 1-x,-1/2+y,1/2-z |
| 63     | C8    | 0      | C.2       | 0.077237    | 0.116161    | 0.196054    | 1-x,-1/2+y,1/2-z |
| 64     | C9    | 0      | C.2       | 0.059455    | 0.154447    | 0.151279    | 1-x,-1/2+y,1/2-z |
| 65     | C10   | 0      | C.2       | 0.127625    | 0.234922    | 0.145579    | 1-x,-1/2+y,1/2-z |
| 66     | C11   | 0      | C.2       | 0.213579    | 0.277113    | 0.184653    | 1-x,-1/2+y,1/2-z |
| 67     | N1    | 0      | N.2       | 0.231363    | 0.238829    | 0.229427    | 1-x,-1/2+y,1/2-z |
| 68     | C12   | 0      | C.3       | 0.230802    | -0.000721   | 0.452047    | 1-x,-1/2+y,1/2-z |
| 69     | H12A  | 0      | H         | 0.349255    | -0.024783   | 0.453806    | 1-x,-1/2+y,1/2-z |
| 70     | H12B  | 0      | H         | 0.152998    | -0.031815   | 0.428241    | 1-x,-1/2+y,1/2-z |
| 71     | H12C  | 0      | H         | 0.186321    | -0.005269   | 0.483395    | 1-x,-1/2+y,1/2-z |
| 72     | C13   | 0      | C.3       | 0.395968    | 0.111458    | 0.457558    | 1-x,-1/2+y,1/2-z |
| 73     | H13A  | 0      | H         | 0.38676     | 0.137696    | 0.488792    | 1-x,-1/2+y,1/2-z |
| 74     | H13B  | 0      | H         | 0.445544    | 0.152293    | 0.436424    | 1-x,-1/2+y,1/2-z |
| 75     | H13C  | 0      | H         | 0.472532    | 0.061711    | 0.461614    | 1-x,-1/2+y,1/2-z |
| 76     | C14   | 0      | C.3       | 0.074297    | 0.135397    | 0.45773     | 1-x,-1/2+y,1/2-z |
| 77     | H14A  | 0      | H         | 0.080353    | 0.128592    | 0.492522    | 1-x,-1/2+y,1/2-z |
| 78     | H14B  | 0      | H         | -0.035761   | 0.111063    | 0.442783    | 1-x,-1/2+y,1/2-z |
| 79     | H14C  | 0      | H         | 0.078759    | 0.19573     | 0.449841    | 1-x,-1/2+y,1/2-z |
| 80     | C15   | 0      | C.3       | 0.55472     | 0.41474     | 0.279446    | 1-x,-1/2+y,1/2-z |
| 81     | C16   | 0      | C.3       | 0.576174    | 0.388461    | 0.328023    | 1-x,-1/2+y,1/2-z |
| 82     | C18   | 0      | C.3       | 0.63187     | 0.302682    | 0.329382    | 1-x,-1/2+y,1/2-z |
| 83     | C17   | 0      | C.3       | 0.644838    | 0.275945    | 0.281644    | 1-x,-1/2+y,1/2-z |
| 84     | C19   | 0      | C.3       | 0.597156    | 0.3452      | 0.250782    | 1-x,-1/2+y,1/2-z |
| 85     | C20   | 0      | C.3       | 0.458114    | 0.498089    | 0.247073    | 1-x,-1/2+y,1/2-z |
| 86     | H20A  | 0      | H         | 0.381526    | 0.529155    | 0.266799    | 1-x,-1/2+y,1/2-z |
| 87     | H20B  | 0      | H         | 0.388439    | 0.476396    | 0.218425    | 1-x,-1/2+y,1/2-z |
| 88     | H20C  | 0      | H         | 0.549424    | 0.536129    | 0.23758     | 1-x,-1/2+y,1/2-z |
| 89     | C21   | 0      | C.3       | 0.624334    | 0.330051    | 0.196276    | 1-x,-1/2+y,1/2-z |
| 90     | H21A  | 0      | H         | 0.570285    | 0.376549    | 0.176895    | 1-x,-1/2+y,1/2-z |
| 91     | H21B  | 0      | H         | 0.5693      | 0.276421    | 0.1855      | 1-x,-1/2+y,1/2-z |
| 92     | H21C  | 0      | H         | 0.750214    | 0.327819    | 0.192747    | 1-x,-1/2+y,1/2-z |
| 93     | C22   | 0      | C.3       | 0.731092    | 0.194183    | 0.26653     | 1-x,-1/2+y,1/2-z |
| 94     | H22A  | 0      | H         | 0.840879    | 0.184751    | 0.287063    | 1-x,-1/2+y,1/2-z |
| 95     | H22B  | 0      | H         | 0.756185    | 0.199022    | 0.233156    | 1-x,-1/2+y,1/2-z |
| 96     | H22C  | 0      | H         | 0.651425    | 0.14644     | 0.269696    | 1-x,-1/2+y,1/2-z |
| 97     | C23   | 0      | C.3       | 0.700116    | 0.248165    | 0.376121    | 1-x,-1/2+y,1/2-z |
| 98     | H23A  | 0      | H         | 0.713164    | 0.28531     | 0.404195    | 1-x,-1/2+y,1/2-z |
| 99     | H23B  | 0      | H         | 0.813793    | 0.222526    | 0.371669    | 1-x,-1/2+y,1/2-z |
| 100    | H23C  | 0      | H         | 0.614895    | 0.203505    | 0.380925    | 1-x,-1/2+y,1/2-z |
| 101    | C24   | 0      | C.3       | 0.535221    | 0.433164    | 0.371347    | 1-x,-1/2+y,1/2-z |
| 102    | H24A  | 0      | H         | 0.454837    | 0.480124    | 0.362372    | 1-x,-1/2+y,1/2-z |
| 103    | H24B  | 0      | H         | 0.643801    | 0.455328    | 0.38841     | 1-x,-1/2+y,1/2-z |
| 104    | H24C  | 0      | H         | 0.479715    | 0.393848    | 0.39215     | 1-x,-1/2+y,1/2-z |
| 105    | Ir1   | 0      | Ir        | 0.37543     | 0.202       | 0.787474    | 1-x,1-y,1-z      |
| 106    | I1    | 0      | I         | 0.077635    | 0.119595    | 0.800261    | 1-x,1-y,1-z      |
| 107    | N2    | 0      | N.4       | 0.236484    | 0.412172    | 0.938251    | 1-x,1-y,1-z      |
| 108    | C1    | 0      | C.3       | 0.269943    | 0.307114    | 0.818327    | 1-x,1-y,1-z      |
| 109    | C2    | 0      | C.2       | 0.288231    | 0.325444    | 0.866965    | 1-x,1-y,1-z      |

|     |      |   |     |           |           |          |                 |
|-----|------|---|-----|-----------|-----------|----------|-----------------|
| 110 | C3   | 0 | C.2 | 0.21986   | 0.400227  | 0.883336 | 1-x,1-y,1-z     |
| 111 | C4   | 0 | C.2 | 0.133201  | 0.456679  | 0.851069 | 1-x,1-y,1-z     |
| 112 | C5   | 0 | C.2 | 0.114911  | 0.438349  | 0.802431 | 1-x,1-y,1-z     |
| 113 | C6   | 0 | C.2 | 0.183281  | 0.363567  | 0.786059 | 1-x,1-y,1-z     |
| 114 | C7   | 0 | C.2 | 0.163191  | 0.341648  | 0.735128 | 1-x,1-y,1-z     |
| 115 | C8   | 0 | C.2 | 0.077237  | 0.383839  | 0.696054 | 1-x,1-y,1-z     |
| 116 | C9   | 0 | C.2 | 0.059455  | 0.345553  | 0.651279 | 1-x,1-y,1-z     |
| 117 | C10  | 0 | C.2 | 0.127625  | 0.265078  | 0.645579 | 1-x,1-y,1-z     |
| 118 | C11  | 0 | C.2 | 0.213579  | 0.222887  | 0.684653 | 1-x,1-y,1-z     |
| 119 | N1   | 0 | N.2 | 0.231363  | 0.261171  | 0.729427 | 1-x,1-y,1-z     |
| 120 | C12  | 0 | C.3 | 0.230802  | 0.500721  | 0.952047 | 1-x,1-y,1-z     |
| 121 | H12A | 0 | H   | 0.349255  | 0.524783  | 0.953806 | 1-x,1-y,1-z     |
| 122 | H12B | 0 | H   | 0.152998  | 0.531815  | 0.928241 | 1-x,1-y,1-z     |
| 123 | H12C | 0 | H   | 0.186321  | 0.505269  | 0.983395 | 1-x,1-y,1-z     |
| 124 | C13  | 0 | C.3 | 0.395968  | 0.388542  | 0.957558 | 1-x,1-y,1-z     |
| 125 | H13A | 0 | H   | 0.38676   | 0.362304  | 0.988792 | 1-x,1-y,1-z     |
| 126 | H13B | 0 | H   | 0.445544  | 0.347707  | 0.936424 | 1-x,1-y,1-z     |
| 127 | H13C | 0 | H   | 0.472532  | 0.438289  | 0.961614 | 1-x,1-y,1-z     |
| 128 | C14  | 0 | C.3 | 0.074297  | 0.364603  | 0.95773  | 1-x,1-y,1-z     |
| 129 | H14A | 0 | H   | 0.080353  | 0.371408  | 0.992522 | 1-x,1-y,1-z     |
| 130 | H14B | 0 | H   | -0.035761 | 0.388937  | 0.942783 | 1-x,1-y,1-z     |
| 131 | H14C | 0 | H   | 0.078759  | 0.30427   | 0.949841 | 1-x,1-y,1-z     |
| 132 | C15  | 0 | C.3 | 0.55472   | 0.08526   | 0.779446 | 1-x,1-y,1-z     |
| 133 | C16  | 0 | C.3 | 0.576174  | 0.111539  | 0.828023 | 1-x,1-y,1-z     |
| 134 | C18  | 0 | C.3 | 0.63187   | 0.197318  | 0.829382 | 1-x,1-y,1-z     |
| 135 | C17  | 0 | C.3 | 0.644838  | 0.224055  | 0.781644 | 1-x,1-y,1-z     |
| 136 | C19  | 0 | C.3 | 0.597156  | 0.1548    | 0.750782 | 1-x,1-y,1-z     |
| 137 | C20  | 0 | C.3 | 0.458114  | 0.001911  | 0.747073 | 1-x,1-y,1-z     |
| 138 | H20A | 0 | H   | 0.381526  | -0.029155 | 0.766799 | 1-x,1-y,1-z     |
| 139 | H20B | 0 | H   | 0.388439  | 0.023604  | 0.718425 | 1-x,1-y,1-z     |
| 140 | H20C | 0 | H   | 0.549424  | -0.036129 | 0.73758  | 1-x,1-y,1-z     |
| 141 | C21  | 0 | C.3 | 0.624334  | 0.169949  | 0.696276 | 1-x,1-y,1-z     |
| 142 | H21A | 0 | H   | 0.570285  | 0.123451  | 0.676895 | 1-x,1-y,1-z     |
| 143 | H21B | 0 | H   | 0.5693    | 0.223579  | 0.6855   | 1-x,1-y,1-z     |
| 144 | H21C | 0 | H   | 0.750214  | 0.172181  | 0.692747 | 1-x,1-y,1-z     |
| 145 | C22  | 0 | C.3 | 0.731092  | 0.305817  | 0.76653  | 1-x,1-y,1-z     |
| 146 | H22A | 0 | H   | 0.840879  | 0.315249  | 0.787063 | 1-x,1-y,1-z     |
| 147 | H22B | 0 | H   | 0.756185  | 0.300978  | 0.733156 | 1-x,1-y,1-z     |
| 148 | H22C | 0 | H   | 0.651425  | 0.35356   | 0.769696 | 1-x,1-y,1-z     |
| 149 | C23  | 0 | C.3 | 0.700116  | 0.251835  | 0.876121 | 1-x,1-y,1-z     |
| 150 | H23A | 0 | H   | 0.713164  | 0.21469   | 0.904195 | 1-x,1-y,1-z     |
| 151 | H23B | 0 | H   | 0.813793  | 0.277474  | 0.871669 | 1-x,1-y,1-z     |
| 152 | H23C | 0 | H   | 0.614895  | 0.296495  | 0.880925 | 1-x,1-y,1-z     |
| 153 | C24  | 0 | C.3 | 0.535221  | 0.066836  | 0.871347 | 1-x,1-y,1-z     |
| 154 | H24A | 0 | H   | 0.454837  | 0.019876  | 0.862372 | 1-x,1-y,1-z     |
| 155 | H24B | 0 | H   | 0.643801  | 0.044672  | 0.88841  | 1-x,1-y,1-z     |
| 156 | H24C | 0 | H   | 0.479715  | 0.106152  | 0.89215  | 1-x,1-y,1-z     |
| 157 | IR1  | 0 | Ir  | 0.62457   | 0.702     | 0.712526 | x,1.5-y,1/2+z   |
| 158 | I1   | 0 | I   | 0.922365  | 0.619595  | 0.699739 | x,1.5-y,1/2+z   |
| 159 | N2   | 0 | N.4 | 0.763516  | 0.912172  | 0.561749 | x,1.5-y,1/2+z   |
| 160 | C1   | 0 | C.3 | 0.730057  | 0.807114  | 0.681673 | x,1.5-y,1/2+z   |
| 161 | C2   | 0 | C.2 | 0.711769  | 0.825444  | 0.633035 | x,1.5-y,1/2+z   |
| 162 | C3   | 0 | C.2 | 0.78014   | 0.900227  | 0.616664 | x,1.5-y,1/2+z   |
| 163 | C4   | 0 | C.2 | 0.866799  | 0.956679  | 0.648931 | x,1.5-y,1/2+z   |
| 164 | C5   | 0 | C.2 | 0.895089  | 0.938349  | 0.697569 | x,1.5-y,1/2+z   |
| 165 | C6   | 0 | C.2 | 0.816719  | 0.863567  | 0.713941 | x,1.5-y,1/2+z   |
| 166 | C7   | 0 | C.2 | 0.836809  | 0.841648  | 0.764872 | x,1.5-y,1/2+z   |
| 167 | C8   | 0 | C.2 | 0.922763  | 0.883839  | 0.803946 | x,1.5-y,1/2+z   |
| 168 | C9   | 0 | C.2 | 0.940545  | 0.845553  | 0.848721 | x,1.5-y,1/2+z   |
| 169 | C10  | 0 | C.2 | 0.872375  | 0.765078  | 0.854421 | x,1.5-y,1/2+z   |
| 170 | C11  | 0 | C.2 | 0.786421  | 0.722887  | 0.815347 | x,1.5-y,1/2+z   |
| 171 | N1   | 0 | N.2 | 0.768637  | 0.761171  | 0.770573 | x,1.5-y,1/2+z   |
| 172 | C12  | 0 | C.3 | 0.769198  | 1.00072   | 0.547953 | x,1.5-y,1/2+z   |
| 173 | H12A | 0 | H   | 0.650745  | 1.02478   | 0.546194 | x,1.5-y,1/2+z   |
| 174 | H12B | 0 | H   | 0.847002  | 1.03181   | 0.571759 | x,1.5-y,1/2+z   |
| 175 | H12C | 0 | H   | 0.813679  | 1.00527   | 0.516605 | x,1.5-y,1/2+z   |
| 176 | C13  | 0 | C.3 | 0.604032  | 0.888542  | 0.542442 | x,1.5-y,1/2+z   |
| 177 | H13A | 0 | H   | 0.61324   | 0.862304  | 0.511208 | x,1.5-y,1/2+z   |
| 178 | H13B | 0 | H   | 0.554456  | 0.847707  | 0.563576 | x,1.5-y,1/2+z   |
| 179 | H13C | 0 | H   | 0.527468  | 0.938289  | 0.538386 | x,1.5-y,1/2+z   |
| 180 | C14  | 0 | C.3 | 0.925703  | 0.864603  | 0.54227  | x,1.5-y,1/2+z   |
| 181 | H14A | 0 | H   | 0.919647  | 0.871408  | 0.507478 | x,1.5-y,1/2+z   |
| 182 | H14B | 0 | H   | 1.03576   | 0.888937  | 0.557217 | x,1.5-y,1/2+z   |
| 183 | H14C | 0 | H   | 0.921241  | 0.80427   | 0.550159 | x,1.5-y,1/2+z   |
| 184 | C15  | 0 | C.3 | 0.44528   | 0.58526   | 0.720554 | x,1.5-y,1/2+z   |
| 185 | C16  | 0 | C.3 | 0.423826  | 0.611539  | 0.671977 | x,1.5-y,1/2+z   |
| 186 | C18  | 0 | C.3 | 0.36813   | 0.697318  | 0.670618 | x,1.5-y,1/2+z   |
| 187 | C17  | 0 | C.3 | 0.355162  | 0.724055  | 0.718356 | x,1.5-y,1/2+z   |
| 188 | C19  | 0 | C.3 | 0.402844  | 0.6548    | 0.749218 | x,1.5-y,1/2+z   |
| 189 | C20  | 0 | C.3 | 0.541886  | 0.501911  | 0.752927 | x,1.5-y,1/2+z   |
| 190 | H20A | 0 | H   | 0.618474  | 0.470845  | 0.733201 | x,1.5-y,1/2+z   |
| 191 | H20B | 0 | H   | 0.611561  | 0.523604  | 0.781575 | x,1.5-y,1/2+z   |
| 192 | H20C | 0 | H   | 0.450576  | 0.463871  | 0.76242  | x,1.5-y,1/2+z   |
| 193 | C21  | 0 | C.3 | 0.375666  | 0.669949  | 0.803724 | x,1.5-y,1/2+z   |
| 194 | H21A | 0 | H   | 0.429715  | 0.623451  | 0.823105 | x,1.5-y,1/2+z   |
| 195 | H21B | 0 | H   | 0.4307    | 0.723579  | 0.8145   | x,1.5-y,1/2+z   |
| 196 | H21C | 0 | H   | 0.249786  | 0.672181  | 0.807253 | x,1.5-y,1/2+z   |
| 197 | C22  | 0 | C.3 | 0.268908  | 0.805817  | 0.73347  | x,1.5-y,1/2+z   |
| 198 | H22A | 0 | H   | 0.159121  | 0.815249  | 0.712937 | x,1.5-y,1/2+z   |
| 199 | H22B | 0 | H   | 0.243815  | 0.800978  | 0.766844 | x,1.5-y,1/2+z   |
| 200 | H22C | 0 | H   | 0.348575  | 0.85356   | 0.730304 | x,1.5-y,1/2+z   |
| 201 | C23  | 0 | C.3 | 0.299884  | 0.751835  | 0.623879 | x,1.5-y,1/2+z   |
| 202 | H23A | 0 | H   | 0.286836  | 0.71469   | 0.595805 | x,1.5-y,1/2+z   |
| 203 | H23B | 0 | H   | 0.186207  | 0.777474  | 0.628331 | x,1.5-y,1/2+z   |
| 204 | H23C | 0 | H   | 0.385105  | 0.796495  | 0.619075 | x,1.5-y,1/2+z   |
| 205 | C24  | 0 | C.3 | 0.464779  | 0.566836  | 0.628653 | x,1.5-y,1/2+z   |
| 206 | H24A | 0 | H   | 0.545163  | 0.519876  | 0.637628 | x,1.5-y,1/2+z   |
| 207 | H24B | 0 | H   | 0.356199  | 0.544672  | 0.61159  | x,1.5-y,1/2+z   |
| 208 | H24C | 0 | H   | 0.520285  | 0.606152  | 0.60785  | x,1.5-y,1/2+z   |
| 209 | I2   | 0 | I   | 0.28546   | 0.446029  | 0.090468 | x,y,z           |
| 210 | I2   | 0 | I   | 0.71454   | 0.946029  | 0.409532 | 1-x,1/2+y,1/2-z |
| 211 | I2   | 0 | I   | 0.71454   | 0.553971  | 0.909532 | 1-x,1-y,1-z     |
| 212 | I2   | 0 | I   | 0.28546   | 0.053971  | 0.590468 | x,1/2-y,1/2+z   |

## Interatomic distances

| Number | Object1 | Object2 | Length     |
|--------|---------|---------|------------|
| 26     | C1      | IR1     | 2.0758 (1) |
| 27     | C1      | C2      | 1.3900 (1) |
| 20     | C10     | C9      | 1.3900 (1) |
| 19     | C11     | C10     | 1.3900 (1) |
| 4      | C15     | C19     | 1.4200 (1) |
| 3      | C15     | C20     | 1.7228 (1) |
| 2      | C16     | C15     | 1.4200 (1) |
| 7      | C17     | C22     | 1.5310 (1) |
| 8      | C17     | C18     | 1.4200 (1) |

|    |     |     |            |
|----|-----|-----|------------|
| 10 | C18 | C16 | 1.4200 (1) |
| 9  | C18 | C23 | 1.6114 (1) |
| 6  | C19 | C17 | 1.4200 (1) |
| 5  | C19 | C21 | 1.5856 (1) |
| 28 | C2  | C3  | 1.3900 (1) |
| 1  | C24 | C16 | 1.4696 (1) |
| 29 | C3  | C4  | 1.3900 (1) |
| 32 | C3  | N2  | 1.5469 (1) |
| 30 | C4  | C5  | 1.3900 (1) |
| 25 | C6  | C1  | 1.3900 (1) |
| 31 | C6  | C3  | 2.7800 (2) |
| 24 | C7  | C6  | 1.4651 (1) |
| 23 | C7  | N1  | 1.3900 (1) |
| 22 | C8  | C7  | 1.3900 (1) |
| 21 | C9  | C8  | 1.3900 (1) |
| 11 | IR1 | C17 | 2.1156 (3) |
| 16 | IR1 | I1  | 2.6826 (3) |
| 17 | IR1 | N1  | 2.0917 (1) |
| 12 | IR1 | C18 | 2.1828 (2) |
| 13 | IR1 | C16 | 2.3102 (1) |
| 15 | IR1 | C19 | 2.2067 (2) |
| 14 | IR1 | C15 | 2.3243 (1) |
| 18 | N1  | C11 | 1.3900 (1) |
| 34 | N2  | C14 | 1.5968 (1) |
| 35 | N2  | C12 | 1.4535 (1) |
| 36 | N2  | I2  | 4.4375 (4) |
| 33 | N2  | C13 | 1.3366 (1) |

## Interatomic angles.

| Number | Atom1 | Atom2 | Atom3 | Angle  |
|--------|-------|-------|-------|--------|
| 1      | C1    | IR1   | I1    | 87.64  |
| 1      | I1    | IR1   | C1    | 87.64  |
| 2      | N1    | IR1   | I1    | 86.28  |
| 2      | I1    | IR1   | N1    | 86.28  |
| 3      | C15   | IR1   | I1    | 98.46  |
| 3      | I1    | IR1   | C15   | 98.46  |
| 4      | C16   | IR1   | I1    | 99.49  |
| 4      | I1    | IR1   | C16   | 99.49  |
| 5      | I1    | IR1   | C18   | 129.84 |
| 5      | C18   | IR1   | I1    | 129.84 |
| 6      | C17   | IR1   | I1    | 160.04 |
| 6      | I1    | IR1   | C17   | 160.04 |
| 7      | C19   | IR1   | I1    | 127.24 |
| 7      | I1    | IR1   | C19   | 127.24 |
| 8      | N1    | IR1   | C1    | 76.81  |
| 8      | C1    | IR1   | N1    | 76.81  |
| 9      | C1    | IR1   | C15   | 159.23 |
| 9      | C15   | IR1   | C1    | 159.23 |
| 10     | C16   | IR1   | C1    | 123.83 |
| 10     | C1    | IR1   | C16   | 123.83 |
| 11     | C18   | IR1   | C1    | 99.74  |
| 11     | C1    | IR1   | C18   | 99.74  |
| 12     | C17   | IR1   | C1    | 109.02 |
| 12     | C1    | IR1   | C17   | 109.02 |
| 13     | C1    | IR1   | C19   | 144.86 |
| 13     | C19   | IR1   | C1    | 144.86 |
| 14     | C15   | IR1   | N1    | 123.20 |
| 14     | N1    | IR1   | C15   | 123.20 |
| 15     | C16   | IR1   | N1    | 158.51 |
| 15     | N1    | IR1   | C16   | 158.51 |
| 16     | C18   | IR1   | N1    | 143.82 |
| 16     | N1    | IR1   | C18   | 143.82 |
| 17     | N1    | IR1   | C17   | 107.75 |
| 17     | C17   | IR1   | N1    | 107.75 |
| 18     | C19   | IR1   | N1    | 98.93  |
| 18     | N1    | IR1   | C19   | 98.93  |
| 19     | C16   | IR1   | C15   | 35.68  |
| 19     | C15   | IR1   | C16   | 35.68  |
| 20     | C18   | IR1   | C15   | 61.20  |
| 20     | C15   | IR1   | C18   | 61.20  |
| 21     | C17   | IR1   | C15   | 62.12  |
| 21     | C15   | IR1   | C17   | 62.12  |
| 22     | C15   | IR1   | C19   | 36.41  |
| 22     | C19   | IR1   | C15   | 36.41  |
| 23     | C18   | IR1   | C16   | 36.71  |
| 23     | C16   | IR1   | C18   | 36.71  |
| 24     | C17   | IR1   | C16   | 62.37  |
| 24     | C16   | IR1   | C17   | 62.37  |
| 25     | C19   | IR1   | C16   | 61.10  |
| 25     | C16   | IR1   | C19   | 61.10  |
| 26     | C18   | IR1   | C17   | 38.54  |
| 26     | C17   | IR1   | C18   | 38.54  |
| 27     | C19   | IR1   | C18   | 63.12  |
| 27     | C18   | IR1   | C19   | 63.12  |
| 28     | C19   | IR1   | C17   | 38.29  |
| 28     | C17   | IR1   | C19   | 38.29  |
| 29     | C12   | N2    | C3    | 112.45 |
| 29     | C3    | N2    | C12   | 112.45 |
| 30     | C3    | N2    | C13   | 110.31 |
| 30     | C13   | N2    | C3    | 110.31 |
| 31     | C14   | N2    | C3    | 107.40 |
| 31     | C3    | N2    | C14   | 107.40 |
| 32     | C13   | N2    | C12   | 102.25 |
| 32     | C12   | N2    | C13   | 102.25 |
| 33     | C14   | N2    | C12   | 108.38 |
| 33     | C12   | N2    | C14   | 108.38 |
| 34     | C13   | N2    | C14   | 116.09 |
| 34     | C14   | N2    | C13   | 116.09 |
| 35     | C2    | C1    | IR1   | 125.03 |
| 35     | IR1   | C1    | C2    | 125.03 |
| 36     | C6    | C1    | IR1   | 114.89 |
| 36     | IR1   | C1    | C6    | 114.89 |
| 37     | C6    | C1    | C2    | 120.00 |
| 37     | C2    | C1    | C6    | 120.00 |
| 38     | C3    | C2    | C1    | 120.00 |
| 38     | C1    | C2    | C3    | 120.00 |
| 39     | N2    | C3    | C2    | 116.07 |
| 39     | C2    | C3    | N2    | 116.07 |
| 40     | C4    | C3    | N2    | 123.81 |
| 40     | N2    | C3    | C4    | 123.81 |
| 41     | C4    | C3    | C2    | 120.00 |
| 41     | C2    | C3    | C4    | 120.00 |
| 42     | C5    | C4    | C3    | 120.00 |
| 42     | C3    | C4    | C5    | 120.00 |
| 43     | C4    | C5    | C6    | 120.00 |



|     |      |     |      |        |
|-----|------|-----|------|--------|
| 43  | C6   | C5  | C4   | 120.00 |
| 44  | C5   | C6  | C1   | 120.00 |
| 44  | C1   | C6  | C5   | 120.00 |
| 45  | C7   | C6  | C1   | 118.68 |
| 45  | C1   | C6  | C7   | 118.68 |
| 46  | C7   | C6  | C5   | 121.31 |
| 46  | C5   | C6  | C7   | 121.31 |
| 47  | C6   | C7  | C8   | 130.63 |
| 47  | C8   | C7  | C6   | 130.63 |
| 48  | N1   | C7  | C6   | 109.06 |
| 48  | C6   | C7  | N1   | 109.06 |
| 49  | N1   | C7  | C8   | 120.00 |
| 49  | C8   | C7  | N1   | 120.00 |
| 50  | C9   | C8  | C7   | 120.00 |
| 50  | C7   | C8  | C9   | 120.00 |
| 51  | C8   | C9  | C10  | 120.00 |
| 51  | C10  | C9  | C8   | 120.00 |
| 52  | C11  | C10 | C9   | 120.00 |
| 52  | C9   | C10 | C11  | 120.00 |
| 53  | N1   | C11 | C10  | 120.00 |
| 53  | C10  | C11 | N1   | 120.00 |
| 54  | C7   | N1  | IR1  | 119.51 |
| 54  | IR1  | N1  | C7   | 119.51 |
| 55  | C11  | N1  | IR1  | 120.35 |
| 55  | IR1  | N1  | C11  | 120.35 |
| 56  | C7   | N1  | C11  | 120.00 |
| 56  | C11  | N1  | C7   | 120.00 |
| 57  | H12A | C12 | N2   | 109.47 |
| 57  | N2   | C12 | H12A | 109.47 |
| 58  | H12B | C12 | N2   | 109.47 |
| 58  | N2   | C12 | H12B | 109.47 |
| 59  | H12C | C12 | N2   | 109.47 |
| 59  | N2   | C12 | H12C | 109.47 |
| 60  | H12A | C12 | H12B | 109.47 |
| 60  | H12B | C12 | H12A | 109.47 |
| 61  | H12C | C12 | H12A | 109.47 |
| 61  | H12A | C12 | H12C | 109.47 |
| 62  | H12C | C12 | H12B | 109.47 |
| 62  | H12B | C12 | H12C | 109.47 |
| 63  | H13A | C13 | N2   | 109.47 |
| 63  | N2   | C13 | H13A | 109.47 |
| 64  | N2   | C13 | H13B | 109.47 |
| 64  | H13B | C13 | N2   | 109.47 |
| 65  | H13C | C13 | N2   | 109.47 |
| 65  | N2   | C13 | H13C | 109.47 |
| 66  | H13B | C13 | H13A | 109.47 |
| 66  | H13A | C13 | H13B | 109.47 |
| 67  | H13C | C13 | H13A | 109.47 |
| 67  | H13A | C13 | H13C | 109.47 |
| 68  | H13B | C13 | H13C | 109.47 |
| 68  | H13C | C13 | H13B | 109.47 |
| 69  | H14A | C14 | N2   | 109.47 |
| 69  | N2   | C14 | H14A | 109.47 |
| 70  | H4B  | C14 | N2   | 109.47 |
| 70  | N2   | C14 | H14B | 109.47 |
| 71  | H14C | C14 | N2   | 109.47 |
| 71  | N2   | C14 | H14C | 109.47 |
| 72  | H14B | C14 | H14A | 109.47 |
| 72  | H14A | C14 | H14B | 109.47 |
| 73  | H14A | C14 | H14C | 109.47 |
| 73  | H14C | C14 | H14A | 109.47 |
| 74  | H14C | C14 | H14B | 109.47 |
| 74  | H14B | C14 | H14C | 109.47 |
| 75  | C16  | C15 | IR1  | 71.62  |
| 75  | IR1  | C15 | C16  | 71.62  |
| 76  | C19  | C15 | IR1  | 67.28  |
| 76  | IR1  | C15 | C19  | 67.28  |
| 77  | IR1  | C15 | C20  | 115.62 |
| 77  | C20  | C15 | IR1  | 115.62 |
| 78  | C19  | C15 | C16  | 108.00 |
| 78  | C16  | C15 | C19  | 108.00 |
| 79  | C20  | C15 | C16  | 136.99 |
| 79  | C16  | C15 | C20  | 136.99 |
| 80  | C20  | C15 | C19  | 113.75 |
| 80  | C19  | C15 | C20  | 113.75 |
| 81  | IR1  | C16 | C15  | 72.70  |
| 81  | C15  | C16 | IR1  | 72.70  |
| 82  | C18  | C16 | IR1  | 66.76  |
| 82  | IR1  | C16 | C18  | 66.76  |
| 83  | C24  | C16 | IR1  | 121.15 |
| 83  | IR1  | C16 | C24  | 121.15 |
| 84  | C18  | C16 | C15  | 108.00 |
| 84  | C15  | C16 | C18  | 108.00 |
| 85  | C15  | C16 | C24  | 130.01 |
| 85  | C24  | C16 | C15  | 130.01 |
| 86  | C24  | C16 | C18  | 121.73 |
| 86  | C18  | C16 | C24  | 121.73 |
| 87  | C16  | C18 | IR1  | 76.53  |
| 87  | IR1  | C18 | C16  | 76.53  |
| 88  | C17  | C18 | IR1  | 68.17  |
| 88  | IR1  | C18 | C17  | 68.17  |
| 89  | C23  | C18 | IR1  | 128.20 |
| 89  | IR1  | C18 | C23  | 128.20 |
| 90  | C16  | C18 | C17  | 108.00 |
| 90  | C17  | C18 | C16  | 108.00 |
| 91  | C23  | C18 | C16  | 127.07 |
| 91  | C16  | C18 | C23  | 127.07 |
| 92  | C23  | C18 | C17  | 124.23 |
| 92  | C17  | C18 | C23  | 124.23 |
| 93  | C18  | C17 | IR1  | 73.29  |
| 93  | IR1  | C17 | C18  | 73.29  |
| 94  | IR1  | C17 | C19  | 74.34  |
| 94  | C19  | C17 | IR1  | 74.34  |
| 95  | C22  | C17 | IR1  | 127.81 |
| 95  | IR1  | C17 | C22  | 127.81 |
| 96  | C19  | C17 | C18  | 108.00 |
| 96  | C18  | C17 | C19  | 108.00 |
| 97  | C22  | C17 | C18  | 126.02 |
| 97  | C18  | C17 | C22  | 126.02 |
| 98  | C19  | C17 | C22  | 124.84 |
| 98  | C22  | C17 | C19  | 124.84 |
| 99  | C15  | C19 | IR1  | 76.30  |
| 99  | IR1  | C19 | C15  | 76.30  |
| 100 | C17  | C19 | IR1  | 67.38  |
| 100 | IR1  | C19 | C17  | 67.38  |
| 101 | C21  | C19 | IR1  | 125.86 |
| 101 | IR1  | C19 | C21  | 125.86 |
| 102 | C15  | C19 | C17  | 108.00 |
| 102 | C17  | C19 | C15  | 108.00 |

|     |      |     |      |        |
|-----|------|-----|------|--------|
| 103 | C21  | C19 | C15  | 136.54 |
| 103 | C15  | C19 | C21  | 136.54 |
| 104 | C21  | C19 | C17  | 114.99 |
| 104 | C17  | C19 | C21  | 114.99 |
| 105 | H20A | C20 | C15  | 109.47 |
| 105 | C15  | C20 | H20A | 109.47 |
| 106 | H20B | C20 | C15  | 109.47 |
| 106 | C15  | C20 | H20B | 109.47 |
| 107 | C15  | C20 | H20C | 109.47 |
| 107 | H20C | C20 | C15  | 109.47 |
| 108 | H20B | C20 | H20A | 109.47 |
| 108 | H20A | C20 | H20B | 109.47 |
| 109 | H20C | C20 | H20A | 109.47 |
| 109 | H20A | C20 | H20C | 109.47 |
| 110 | H20C | C20 | H20B | 109.47 |
| 110 | H20B | C20 | H20C | 109.47 |
| 111 | C19  | C21 | H21A | 109.47 |
| 111 | H21A | C21 | C19  | 109.47 |
| 112 | H21B | C21 | C19  | 109.47 |
| 112 | C19  | C21 | H21B | 109.47 |
| 113 | H21C | C21 | C19  | 109.47 |
| 113 | C19  | C21 | H21C | 109.47 |
| 114 | H21B | C21 | H21A | 109.47 |
| 114 | H21A | C21 | H21B | 109.47 |
| 115 | H21A | C21 | H21C | 109.47 |
| 115 | H21C | C21 | H21A | 109.47 |
| 116 | H21C | C21 | H21B | 109.47 |
| 116 | H21B | C21 | H21C | 109.47 |
| 117 | H22A | C22 | C17  | 109.47 |
| 117 | C17  | C22 | H22A | 109.47 |
| 118 | H22B | C22 | C17  | 109.47 |
| 118 | C17  | C22 | H22B | 109.47 |
| 119 | C17  | C22 | H22C | 109.47 |
| 119 | H22C | C22 | C17  | 109.47 |
| 120 | H22B | C22 | H22A | 109.47 |
| 120 | H22A | C22 | H22B | 109.47 |
| 121 | H22C | C22 | H22A | 109.47 |
| 121 | H22A | C22 | H22C | 109.47 |
| 122 | H22C | C22 | H22B | 109.47 |
| 122 | H22B | C22 | H22C | 109.47 |
| 123 | C18  | C23 | H23A | 109.47 |
| 123 | H23A | C23 | C18  | 109.47 |
| 124 | H23B | C23 | C18  | 109.47 |
| 124 | C18  | C23 | H23B | 109.47 |
| 125 | H23C | C23 | C18  | 109.47 |
| 125 | C18  | C23 | H23C | 109.47 |
| 126 | H23B | C23 | H23A | 109.47 |
| 126 | H23A | C23 | H23B | 109.47 |
| 127 | H23A | C23 | H23C | 109.47 |
| 127 | H23C | C23 | H23A | 109.47 |
| 128 | H23C | C23 | H23B | 109.47 |
| 128 | H23B | C23 | H23C | 109.47 |
| 129 | H24A | C24 | C16  | 109.47 |
| 129 | C16  | C24 | H24A | 109.47 |
| 130 | H24B | C24 | C16  | 109.47 |
| 130 | C16  | C24 | H24B | 109.47 |
| 131 | C16  | C24 | H24C | 109.47 |
| 131 | H24C | C24 | C16  | 109.47 |
| 132 | H24B | C24 | H24A | 109.47 |
| 132 | H24A | C24 | H24B | 109.47 |
| 133 | H24C | C24 | H24A | 109.47 |
| 133 | H24A | C24 | H24C | 109.47 |
| 134 | H24C | C24 | H24B | 109.47 |
| 134 | H24B | C24 | H24C | 109.47 |

## Torsion angles

| Number | Atom1 | Atom2 | Atom3 | Atom4 | Torsion |
|--------|-------|-------|-------|-------|---------|
| 1      | C2    | C1    | IR1   | I1    | -89.47  |
| 1      | I1    | IR1   | C1    | C2    | -89.47  |
| 2      | C6    | C1    | IR1   | I1    | 93.90   |
| 2      | I1    | IR1   | C1    | C6    | 93.90   |
| 3      | C2    | C1    | IR1   | N1    | -176.20 |
| 3      | N1    | IR1   | C1    | C2    | -176.20 |
| 4      | C6    | C1    | IR1   | N1    | 7.17    |
| 4      | N1    | IR1   | C1    | C6    | 7.17    |
| 5      | C15   | IR1   | C1    | C2    | 18.36   |
| 5      | C2    | C1    | IR1   | C15   | 18.36   |
| 6      | C6    | C1    | IR1   | C15   | -158.27 |
| 6      | C15   | IR1   | C1    | C6    | -158.27 |
| 7      | C2    | C1    | IR1   | C16   | 10.37   |
| 7      | C16   | IR1   | C1    | C2    | 10.37   |
| 8      | C6    | C1    | IR1   | C16   | -166.26 |
| 8      | C16   | IR1   | C1    | C6    | -166.26 |
| 9      | C18   | IR1   | C1    | C2    | 40.58   |
| 9      | C2    | C1    | IR1   | C18   | 40.58   |
| 10     | C6    | C1    | IR1   | C18   | -136.05 |
| 10     | C18   | IR1   | C1    | C6    | -136.05 |
| 11     | C2    | C1    | IR1   | C17   | 79.29   |
| 11     | C17   | IR1   | C1    | C2    | 79.29   |
| 12     | C6    | C1    | IR1   | C17   | -97.33  |
| 12     | C17   | IR1   | C1    | C6    | -97.33  |
| 13     | C19   | IR1   | C1    | C2    | 97.00   |
| 13     | C2    | C1    | IR1   | C19   | 97.00   |
| 14     | C6    | C1    | IR1   | C19   | -79.62  |
| 14     | C19   | IR1   | C1    | C6    | -79.62  |
| 15     | C7    | N1    | IR1   | I1    | -98.31  |
| 15     | I1    | IR1   | N1    | C7    | -98.31  |
| 16     | C11   | N1    | IR1   | I1    | 85.93   |
| 16     | I1    | IR1   | N1    | C11   | 85.93   |
| 17     | C1    | IR1   | N1    | C7    | -9.87   |
| 17     | C7    | N1    | IR1   | C1    | -9.87   |
| 18     | C11   | N1    | IR1   | C1    | 174.37  |
| 18     | C1    | IR1   | N1    | C11   | 174.37  |
| 19     | C7    | N1    | IR1   | C15   | 164.01  |
| 19     | C15   | IR1   | N1    | C7    | 164.01  |
| 20     | C11   | N1    | IR1   | C15   | -11.74  |
| 20     | C15   | IR1   | N1    | C11   | -11.74  |
| 21     | C7    | N1    | IR1   | C16   | 155.09  |
| 21     | C16   | IR1   | N1    | C7    | 155.09  |
| 22     | C16   | IR1   | N1    | C11   | -20.66  |
| 22     | C11   | N1    | IR1   | C16   | -20.66  |
| 23     | C7    | N1    | IR1   | C18   | 78.63   |
| 23     | C18   | IR1   | N1    | C7    | 78.63   |
| 24     | C11   | N1    | IR1   | C18   | -97.12  |

|    |     |     |     |     |         |
|----|-----|-----|-----|-----|---------|
| 24 | C18 | IR1 | N1  | C11 | -97.12  |
| 25 | C7  | N1  | IR1 | C17 | 96.18   |
| 25 | C17 | IR1 | N1  | C7  | 96.18   |
| 26 | C17 | IR1 | N1  | C11 | -79.57  |
| 26 | C11 | N1  | IR1 | C17 | -79.57  |
| 27 | C7  | N1  | IR1 | C19 | 134.55  |
| 27 | C19 | IR1 | N1  | C7  | 134.55  |
| 28 | C11 | N1  | IR1 | C19 | -41.20  |
| 28 | C19 | IR1 | N1  | C11 | -41.20  |
| 29 | C16 | C15 | IR1 | I1  | 94.51   |
| 29 | I1  | IR1 | C15 | C16 | 94.51   |
| 30 | I1  | IR1 | C15 | C19 | -146.01 |
| 30 | C19 | C15 | IR1 | I1  | -146.01 |
| 31 | C20 | C15 | IR1 | I1  | -39.54  |
| 31 | I1  | IR1 | C15 | C20 | -39.54  |
| 32 | C16 | C15 | IR1 | C1  | -11.42  |
| 32 | C1  | IR1 | C15 | C16 | -11.42  |
| 33 | C19 | C15 | IR1 | C1  | 108.06  |
| 33 | C1  | IR1 | C15 | C19 | 108.06  |
| 34 | C1  | IR1 | C15 | C20 | -145.47 |
| 34 | C20 | C15 | IR1 | C1  | -145.47 |
| 35 | C16 | C15 | IR1 | N1  | -174.41 |
| 35 | N1  | IR1 | C15 | C16 | -174.41 |
| 36 | C19 | C15 | IR1 | N1  | -54.94  |
| 36 | N1  | IR1 | C15 | C19 | -54.94  |
| 37 | C20 | C15 | IR1 | N1  | 51.54   |
| 37 | N1  | IR1 | C15 | C20 | 51.54   |
| 38 | C19 | C15 | IR1 | C16 | 119.48  |
| 38 | C16 | IR1 | C15 | C19 | 119.48  |
| 39 | C16 | IR1 | C15 | C20 | -134.05 |
| 39 | C20 | C15 | IR1 | C16 | -134.05 |
| 40 | C16 | C15 | IR1 | C18 | -36.59  |
| 40 | C18 | IR1 | C15 | C16 | -36.59  |
| 41 | C19 | C15 | IR1 | C18 | 82.89   |
| 41 | C18 | IR1 | C15 | C19 | 82.89   |
| 42 | C20 | C15 | IR1 | C18 | -170.64 |
| 42 | C18 | IR1 | C15 | C20 | -170.64 |
| 43 | C17 | IR1 | C15 | C16 | -80.63  |
| 43 | C16 | C15 | IR1 | C17 | -80.63  |
| 44 | C19 | C15 | IR1 | C17 | 38.85   |
| 44 | C17 | IR1 | C15 | C19 | 38.85   |
| 45 | C20 | C15 | IR1 | C17 | 145.33  |
| 45 | C17 | IR1 | C15 | C20 | 145.33  |
| 46 | C16 | C15 | IR1 | C19 | -119.48 |
| 46 | C19 | IR1 | C15 | C16 | -119.48 |
| 47 | C19 | IR1 | C15 | C20 | 106.47  |
| 47 | C20 | C15 | IR1 | C19 | 106.47  |
| 48 | C15 | C16 | IR1 | I1  | -91.32  |
| 48 | I1  | IR1 | C16 | C15 | -91.32  |
| 49 | C18 | C16 | IR1 | I1  | 149.60  |
| 49 | I1  | IR1 | C16 | C18 | 149.60  |
| 50 | C24 | C16 | IR1 | I1  | 35.45   |
| 50 | I1  | IR1 | C16 | C24 | 35.45   |
| 51 | C1  | IR1 | C16 | C15 | 175.15  |
| 51 | C15 | IR1 | C16 | C1  | 175.15  |
| 52 | C18 | C16 | IR1 | C1  | 56.07   |
| 52 | C1  | IR1 | C16 | C18 | 56.07   |
| 53 | C24 | C16 | IR1 | C1  | -58.08  |
| 53 | C1  | IR1 | C16 | C24 | -58.08  |
| 54 | C15 | C16 | IR1 | N1  | 12.85   |
| 54 | N1  | IR1 | C16 | C15 | 12.85   |
| 55 | C18 | C16 | IR1 | N1  | -106.23 |
| 55 | N1  | IR1 | C16 | C18 | -106.23 |
| 56 | N1  | IR1 | C16 | C24 | 139.62  |
| 56 | C24 | C16 | IR1 | N1  | 139.62  |
| 57 | C18 | C16 | IR1 | C15 | -119.08 |
| 57 | C15 | IR1 | C16 | C18 | -119.08 |
| 58 | C24 | C16 | IR1 | C15 | 126.77  |
| 58 | C15 | IR1 | C16 | C24 | 126.77  |
| 59 | C15 | C16 | IR1 | C18 | 119.08  |
| 59 | C18 | IR1 | C16 | C15 | 119.08  |
| 60 | C18 | IR1 | C16 | C24 | -114.15 |
| 60 | C24 | C16 | IR1 | C18 | -114.15 |
| 61 | C15 | C16 | IR1 | C17 | 79.87   |
| 61 | C17 | IR1 | C16 | C15 | 79.87   |
| 62 | C18 | C16 | IR1 | C17 | -39.21  |
| 62 | C17 | IR1 | C16 | C18 | -39.21  |
| 63 | C24 | C16 | IR1 | C17 | -153.36 |
| 63 | C17 | IR1 | C16 | C24 | -153.36 |
| 64 | C19 | IR1 | C16 | C15 | 36.17   |
| 64 | C15 | C16 | IR1 | C19 | 36.17   |
| 65 | C18 | C16 | IR1 | C19 | -82.91  |
| 65 | C19 | IR1 | C16 | C18 | -82.91  |
| 66 | C24 | C16 | IR1 | C19 | 162.94  |
| 66 | C19 | IR1 | C16 | C24 | 162.94  |
| 67 | C16 | C18 | IR1 | I1  | -40.54  |
| 67 | I1  | IR1 | C18 | C16 | -40.54  |
| 68 | I1  | IR1 | C18 | C17 | -156.53 |
| 68 | C17 | IR1 | C18 | I1  | -156.53 |
| 69 | C23 | C18 | IR1 | I1  | 86.35   |
| 69 | I1  | IR1 | C18 | C23 | 86.35   |
| 70 | C16 | C18 | IR1 | C1  | -135.63 |
| 70 | C1  | IR1 | C18 | C16 | -135.63 |
| 71 | C17 | C18 | IR1 | C1  | 108.38  |
| 71 | C1  | IR1 | C18 | C17 | 108.38  |
| 72 | C23 | C18 | IR1 | C1  | -8.73   |
| 72 | C1  | IR1 | C18 | C23 | -8.73   |
| 73 | N1  | IR1 | C18 | C16 | 143.44  |
| 73 | C16 | C18 | IR1 | N1  | 143.44  |
| 74 | C17 | C18 | IR1 | N1  | 27.44   |
| 74 | N1  | IR1 | C18 | C17 | 27.44   |
| 75 | C23 | C18 | IR1 | N1  | -89.67  |
| 75 | N1  | IR1 | C18 | C23 | -89.67  |
| 76 | C16 | C18 | IR1 | C15 | 35.57   |
| 76 | C15 | IR1 | C18 | C16 | 35.57   |
| 77 | C15 | IR1 | C18 | C17 | -80.42  |
| 77 | C17 | C18 | IR1 | C15 | -80.42  |
| 78 | C23 | C18 | IR1 | C15 | 162.46  |
| 78 | C15 | IR1 | C18 | C23 | 162.46  |
| 79 | C17 | C18 | IR1 | C16 | -115.99 |
| 79 | C16 | IR1 | C18 | C17 | -115.99 |
| 80 | C23 | C18 | IR1 | C16 | 126.89  |
| 80 | C16 | IR1 | C18 | C23 | 126.89  |
| 81 | C17 | IR1 | C18 | C15 | 115.99  |
| 81 | C15 | IR1 | C18 | C17 | 115.99  |
| 82 | C23 | C18 | IR1 | C17 | -117.11 |
| 82 | C17 | IR1 | C18 | C23 | -117.11 |
| 83 | C16 | C18 | IR1 | C19 | 76.90   |
| 83 | C19 | IR1 | C18 | C16 | 76.90   |

|     |      |     |     |      |         |
|-----|------|-----|-----|------|---------|
| 84  | C17  | C18 | IR1 | C19  | -39.10  |
| 84  | C19  | IR1 | C18 | C17  | -39.10  |
| 85  | C19  | IR1 | C18 | C23  | -156.21 |
| 85  | C23  | C18 | IR1 | C19  | -156.21 |
| 86  | C18  | C17 | IR1 | I1   | 63.61   |
| 86  | I1   | IR1 | C17 | C18  | 63.61   |
| 87  | C19  | C17 | IR1 | I1   | -51.18  |
| 87  | I1   | IR1 | C17 | C19  | -51.18  |
| 88  | C22  | C17 | IR1 | I1   | -173.42 |
| 88  | I1   | IR1 | C17 | C22  | -173.42 |
| 89  | C18  | C17 | IR1 | C1   | -81.63  |
| 89  | C1   | IR1 | C17 | C18  | -81.63  |
| 90  | C1   | IR1 | C17 | C19  | 163.58  |
| 90  | C19  | C17 | IR1 | C1   | 163.58  |
| 91  | C22  | C17 | IR1 | C1   | 41.34   |
| 91  | C1   | IR1 | C17 | C22  | 41.34   |
| 92  | C18  | C17 | IR1 | N1   | -163.40 |
| 92  | N1   | IR1 | C17 | C18  | -163.40 |
| 93  | C19  | C17 | IR1 | N1   | 81.81   |
| 93  | N1   | IR1 | C17 | C19  | 81.81   |
| 94  | N1   | IR1 | C17 | C22  | -40.43  |
| 94  | C22  | C17 | IR1 | N1   | -40.43  |
| 95  | C18  | C17 | IR1 | C15  | 77.85   |
| 95  | C15  | IR1 | C17 | C18  | 77.85   |
| 96  | C19  | C17 | IR1 | C15  | -36.94  |
| 96  | C15  | IR1 | C17 | C19  | -36.94  |
| 97  | C22  | C17 | IR1 | C15  | -159.18 |
| 97  | C15  | IR1 | C17 | C22  | -159.18 |
| 98  | C16  | IR1 | C17 | C18  | 37.33   |
| 98  | C18  | C17 | IR1 | C16  | 37.33   |
| 99  | C19  | C17 | IR1 | C16  | -77.45  |
| 99  | C16  | IR1 | C17 | C19  | -77.45  |
| 100 | C22  | C17 | IR1 | C16  | 160.30  |
| 100 | C16  | IR1 | C17 | C22  | 160.30  |
| 101 | C19  | C17 | IR1 | C18  | -114.79 |
| 101 | C18  | IR1 | C17 | C19  | -114.79 |
| 102 | C18  | IR1 | C17 | C22  | 122.97  |
| 102 | C22  | C17 | IR1 | C18  | 122.97  |
| 103 | C18  | C17 | IR1 | C19  | 114.79  |
| 103 | C19  | IR1 | C17 | C18  | 114.79  |
| 104 | C22  | C17 | IR1 | C19  | -122.24 |
| 104 | C19  | IR1 | C17 | C22  | -122.24 |
| 105 | C15  | C19 | IR1 | I1   | 43.99   |
| 105 | I1   | IR1 | C19 | C15  | 43.99   |
| 106 | C17  | C19 | IR1 | I1   | 160.48  |
| 106 | I1   | IR1 | C19 | C17  | 160.48  |
| 107 | I1   | IR1 | C19 | C21  | -94.23  |
| 107 | C21  | C19 | IR1 | I1   | -94.23  |
| 108 | C15  | C19 | IR1 | C1   | -144.15 |
| 108 | C1   | IR1 | C19 | C15  | -144.15 |
| 109 | C17  | C19 | IR1 | C1   | -27.66  |
| 109 | C1   | IR1 | C19 | C17  | -27.66  |
| 110 | C21  | C19 | IR1 | C1   | 77.63   |
| 110 | C1   | IR1 | C19 | C21  | 77.63   |
| 111 | N1   | IR1 | C19 | C15  | 136.11  |
| 111 | C15  | C19 | IR1 | N1   | 136.11  |
| 112 | C17  | C19 | IR1 | N1   | -107.40 |
| 112 | N1   | IR1 | C19 | C17  | -107.40 |
| 113 | C21  | C19 | IR1 | N1   | -2.12   |
| 113 | N1   | IR1 | C19 | C21  | -2.12   |
| 114 | C17  | C19 | IR1 | C15  | 116.49  |
| 114 | C15  | IR1 | C19 | C17  | 116.49  |
| 115 | C15  | IR1 | C19 | C21  | -138.22 |
| 115 | C21  | C19 | IR1 | C15  | -138.22 |
| 116 | C15  | C19 | IR1 | C16  | -35.45  |
| 116 | C16  | IR1 | C19 | C15  | -35.45  |
| 117 | C17  | C19 | IR1 | C16  | 81.04   |
| 117 | C16  | IR1 | C19 | C17  | 81.04   |
| 118 | C21  | C19 | IR1 | C16  | -173.68 |
| 118 | C16  | IR1 | C19 | C21  | -173.68 |
| 119 | C18  | IR1 | C19 | C15  | -77.14  |
| 119 | C15  | C19 | IR1 | C18  | -77.14  |
| 120 | C17  | C19 | IR1 | C18  | 39.36   |
| 120 | C18  | IR1 | C19 | C17  | 39.36   |
| 121 | C21  | C19 | IR1 | C18  | 144.64  |
| 121 | C18  | IR1 | C19 | C21  | 144.64  |
| 122 | C15  | C19 | IR1 | C17  | -116.49 |
| 122 | C17  | IR1 | C19 | C15  | -116.49 |
| 123 | C17  | IR1 | C19 | C21  | 105.28  |
| 123 | C21  | C19 | IR1 | C17  | 105.28  |
| 124 | C2   | C3  | N2  | C12  | -156.50 |
| 124 | C12  | N2  | C3  | C2   | -156.50 |
| 125 | C4   | C3  | N2  | C12  | 27.42   |
| 125 | C12  | N2  | C3  | C4   | 27.42   |
| 126 | C2   | C3  | N2  | C13  | -43.06  |
| 126 | C13  | N2  | C3  | C2   | -43.06  |
| 127 | C4   | C3  | N2  | C4   | 140.86  |
| 127 | C3   | C3  | N2  | C13  | 140.86  |
| 128 | C2   | C3  | N2  | C14  | 84.35   |
| 128 | C14  | N2  | C3  | C2   | 84.35   |
| 129 | C4   | C3  | N2  | C14  | -91.73  |
| 129 | C14  | N2  | C3  | C4   | -91.73  |
| 130 | H12A | C12 | N2  | C3   | 86.66   |
| 130 | C3   | N2  | C12 | H12A | 86.66   |
| 131 | C3   | N2  | C12 | H12B | -33.34  |
| 131 | H12B | C12 | N2  | C3   | -33.34  |
| 132 | H12C | C12 | N2  | C3   | -153.34 |
| 132 | C3   | N2  | C12 | H12C | -153.34 |
| 133 | H12A | C12 | N2  | C13  | -31.64  |
| 133 | C13  | N2  | C12 | H12A | -31.64  |
| 134 | H12B | C12 | N2  | C13  | -151.64 |
| 134 | C13  | N2  | C12 | H12B | -151.64 |
| 135 | C13  | N2  | C12 | H12C | 88.36   |
| 135 | H12C | C12 | N2  | C13  | 88.36   |
| 136 | H12A | C12 | N2  | C14  | -154.76 |
| 136 | C14  | N2  | C12 | H12A | -154.76 |
| 137 | H12B | C12 | N2  | C14  | 85.24   |
| 137 | C14  | N2  | C12 | H12B | 85.24   |
| 138 | H12C | C12 | N2  | C14  | -34.76  |
| 138 | C14  | N2  | C12 | H12C | -34.76  |
| 139 | H13A | C13 | N2  | C3   | 144.56  |
| 139 | C3   | N2  | C13 | H13A | 144.56  |
| 140 | C3   | N2  | C13 | H13B | 24.56   |
| 140 | H13B | C13 | N2  | C3   | 24.56   |
| 141 | H13C | C13 | N2  | C3   | -95.44  |
| 141 | C3   | N2  | C13 | H13C | -95.44  |
| 142 | H13A | C13 | N2  | C12  | -95.63  |
| 142 | C12  | N2  | C13 | H13A | -95.63  |
| 143 | H13B | C13 | N2  | C12  | 144.37  |

|     |      |     |     |      |         |
|-----|------|-----|-----|------|---------|
| 143 | C12  | N2  | C13 | H13B | 144.37  |
| 144 | C12  | N2  | C13 | H13C | 24.37   |
| 144 | H13C | C13 | N2  | C12  | 24.37   |
| 145 | H13A | C13 | N2  | C14  | 22.12   |
| 145 | C14  | N2  | C13 | H13A | 22.12   |
| 146 | H13B | C13 | N2  | C14  | -97.88  |
| 146 | C14  | N2  | C13 | H13B | -97.88  |
| 147 | H13C | C13 | N2  | C14  | 142.12  |
| 147 | C14  | N2  | C13 | H13C | 142.12  |
| 148 | C3   | N2  | C14 | H14A | 179.49  |
| 148 | H14A | C14 | N2  | C3   | 179.49  |
| 149 | H14B | C14 | N2  | C3   | 59.49   |
| 149 | C3   | N2  | C14 | H14B | 59.49   |
| 150 | H14C | C14 | N2  | C3   | -60.51  |
| 150 | C3   | N2  | C14 | H14C | -60.51  |
| 151 | H14A | C14 | N2  | C12  | 57.76   |
| 151 | C12  | N2  | C14 | H14A | 57.76   |
| 152 | C12  | N2  | C14 | H14B | -62.24  |
| 152 | H14B | C14 | N2  | C12  | -62.24  |
| 153 | H14C | C14 | N2  | C12  | 177.76  |
| 153 | C12  | N2  | C14 | H14C | 177.76  |
| 154 | H14A | C14 | N2  | C13  | -56.55  |
| 154 | C13  | N2  | C14 | H14A | -56.55  |
| 155 | H14B | C14 | N2  | C13  | -176.55 |
| 155 | C13  | N2  | C14 | H14B | -176.55 |
| 156 | H14C | C14 | N2  | C13  | 63.45   |
| 156 | C13  | N2  | C14 | H14C | 63.45   |
| 157 | IR1  | C1  | C2  | C3   | -176.46 |
| 157 | C3   | C2  | C1  | IR1  | -176.46 |
| 158 | C3   | C2  | C1  | C6   | 0.00    |
| 158 | C6   | C2  | C1  | C3   | 0.00    |
| 159 | C5   | C6  | C1  | IR1  | 176.81  |
| 159 | IR1  | C1  | C6  | C5   | 176.81  |
| 160 | C7   | C6  | C1  | IR1  | -4.36   |
| 160 | IR1  | C1  | C6  | C7   | -4.36   |
| 161 | C2   | C1  | C6  | C5   | -0.00   |
| 161 | C5   | C6  | C1  | C2   | -0.00   |
| 162 | C7   | C6  | C1  | C2   | 178.83  |
| 162 | C2   | C1  | C6  | C7   | 178.83  |
| 163 | N2   | C3  | C2  | C1   | -176.23 |
| 163 | C1   | C2  | C3  | N2   | -176.23 |
| 164 | C4   | C3  | C2  | C1   | -0.00   |
| 164 | C3   | C2  | C3  | C4   | -0.00   |
| 165 | N2   | C3  | C4  | C5   | 175.93  |
| 165 | C5   | C4  | C3  | N2   | 175.93  |
| 166 | C5   | C4  | C3  | C2   | -0.00   |
| 166 | C2   | C3  | C4  | C5   | -0.00   |
| 167 | C6   | C5  | C4  | C3   | 0.00    |
| 167 | C3   | C4  | C5  | C6   | 0.00    |
| 168 | C1   | C6  | C5  | C4   | -0.00   |
| 168 | C4   | C5  | C6  | C1   | -0.00   |
| 169 | C4   | C5  | C6  | C7   | -178.80 |
| 169 | C7   | C6  | C5  | C4   | -178.80 |
| 170 | C8   | C7  | C6  | C1   | -176.86 |
| 170 | C1   | C6  | C7  | C8   | -176.86 |
| 171 | N1   | C7  | C6  | C1   | -3.43   |
| 171 | C1   | C6  | C7  | N1   | -3.43   |
| 172 | C8   | C7  | C6  | C5   | 1.95    |
| 172 | C5   | C6  | C7  | C8   | 1.95    |
| 173 | N1   | C7  | C6  | C5   | 175.38  |
| 173 | C5   | C6  | C7  | N1   | 175.38  |
| 174 | C6   | C7  | C8  | C9   | 172.83  |
| 174 | C9   | C8  | C7  | C6   | 172.83  |
| 175 | C9   | C8  | C7  | N1   | -0.00   |
| 175 | N1   | C7  | C8  | C9   | -0.00   |
| 176 | IR1  | N1  | C7  | C6   | 9.99    |
| 176 | C6   | C7  | N1  | IR1  | 9.99    |
| 177 | C11  | N1  | C7  | C6   | -174.25 |
| 177 | C6   | C7  | N1  | C11  | -174.25 |
| 178 | C8   | C7  | N1  | IR1  | -175.77 |
| 178 | IR1  | N1  | C7  | C8   | -175.77 |
| 179 | C11  | N1  | C7  | C8   | 0.00    |
| 179 | C8   | C7  | N1  | C11  | 0.00    |
| 180 | C10  | C9  | C8  | C7   | -0.00   |
| 180 | C7   | C8  | C9  | C10  | -0.00   |
| 181 | C11  | C10 | C9  | C8   | 0.00    |
| 181 | C8   | C9  | C10 | C11  | 0.00    |
| 182 | C9   | C10 | C11 | N1   | 0.00    |
| 182 | N1   | C10 | C9  | C10  | 0.00    |
| 183 | IR1  | N1  | C11 | C10  | 175.73  |
| 183 | C10  | C11 | N1  | IR1  | 175.73  |
| 184 | C7   | N1  | C11 | C10  | -0.00   |
| 184 | C10  | C11 | N1  | C7   | -0.00   |
| 185 | C18  | C16 | C15 | IR1  | 57.60   |
| 185 | IR1  | C15 | C16 | C18  | 57.60   |
| 186 | IR1  | C15 | C16 | C24  | -116.48 |
| 186 | C24  | C16 | C15 | IR1  | -116.48 |
| 187 | IR1  | C16 | C15 | C19  | -57.60  |
| 187 | C19  | C15 | C16 | IR1  | -57.60  |
| 188 | C18  | C16 | C15 | C19  | 0.00    |
| 188 | C19  | C15 | C16 | C18  | 0.00    |
| 189 | C24  | C16 | C15 | C19  | -174.08 |
| 189 | C19  | C15 | C16 | C24  | -174.08 |
| 190 | IR1  | C16 | C15 | C20  | 108.17  |
| 190 | C20  | C15 | C16 | IR1  | 108.17  |
| 191 | C20  | C15 | C16 | C18  | 165.77  |
| 191 | C18  | C16 | C15 | C20  | 165.77  |
| 192 | C24  | C16 | C15 | C20  | -8.31   |
| 192 | C20  | C15 | C16 | C24  | -8.31   |
| 193 | C17  | C19 | C15 | IR1  | -60.30  |
| 193 | IR1  | C15 | C19 | C17  | -60.30  |
| 194 | C21  | C19 | C15 | IR1  | 128.28  |
| 194 | IR1  | C15 | C19 | C21  | 128.28  |
| 195 | C16  | C15 | C19 | IR1  | 60.30   |
| 195 | IR1  | C19 | C15 | C16  | 60.30   |
| 196 | C17  | C19 | C15 | C16  | -0.00   |
| 196 | C16  | C15 | C19 | C17  | -0.00   |
| 197 | C21  | C19 | C15 | C16  | -171.42 |
| 197 | C16  | C15 | C19 | C21  | -171.42 |
| 198 | IR1  | C19 | C15 | C20  | -109.14 |
| 198 | C20  | C15 | C19 | IR1  | -109.14 |
| 199 | C20  | C15 | C19 | C17  | -169.44 |
| 199 | C17  | C19 | C15 | C20  | -169.44 |
| 200 | C21  | C19 | C15 | C20  | 19.14   |
| 200 | C20  | C15 | C19 | C21  | 19.14   |
| 201 | H20A | C20 | C15 | IR1  | 76.65   |
| 201 | IR1  | C15 | C20 | H20A | 76.65   |
| 202 | H20B | C20 | C15 | IR1  | -43.35  |
| 202 | IR1  | C15 | C20 | H20B | -43.35  |

|     |      |     |     |      |         |
|-----|------|-----|-----|------|---------|
| 203 | IR1  | C15 | C20 | H20C | -163.35 |
| 203 | H20C | C20 | C15 | IR1  | -163.35 |
| 204 | H20A | C20 | C15 | C16  | -13.43  |
| 204 | C16  | C15 | C20 | H20A | -13.43  |
| 205 | H20B | C20 | C15 | C16  | -133.43 |
| 205 | C16  | C15 | C20 | H20B | -133.43 |
| 206 | H20C | C20 | C15 | C16  | 106.57  |
| 206 | C16  | C15 | C20 | H20C | 106.57  |
| 207 | H20A | C20 | C15 | C19  | 151.76  |
| 207 | C19  | C15 | C20 | H20A | 151.76  |
| 208 | C19  | C15 | C20 | H20B | 31.76   |
| 208 | H20B | C20 | C15 | C19  | 31.76   |
| 209 | H20C | C20 | C15 | C19  | -88.24  |
| 209 | C19  | C15 | C20 | H20C | -88.24  |
| 210 | C17  | C18 | C16 | IR1  | 61.32   |
| 210 | IR1  | C16 | C18 | C17  | 61.32   |
| 211 | C23  | C18 | C16 | IR1  | -128.03 |
| 211 | IR1  | C16 | C18 | C23  | -128.03 |
| 212 | C15  | C16 | C18 | IR1  | -61.32  |
| 212 | IR1  | C18 | C16 | C15  | -61.32  |
| 213 | C17  | C18 | C16 | C15  | -0.00   |
| 213 | C15  | C16 | C18 | C17  | -0.00   |
| 214 | C23  | C18 | C16 | C15  | 170.65  |
| 214 | C15  | C16 | C18 | C23  | 170.65  |
| 215 | IR1  | C18 | C16 | C24  | 113.35  |
| 215 | C24  | C16 | C18 | IR1  | 113.35  |
| 216 | C24  | C16 | C18 | C17  | 174.67  |
| 216 | C17  | C18 | C16 | C24  | 174.67  |
| 217 | C23  | C18 | C16 | C24  | -14.68  |
| 217 | C24  | C16 | C18 | C23  | -14.68  |
| 218 | H24A | C24 | C16 | IR1  | -75.75  |
| 218 | IR1  | C16 | C24 | H24A | -75.75  |
| 219 | H24B | C24 | C16 | IR1  | 164.25  |
| 219 | IR1  | C16 | C24 | H24B | 164.25  |
| 220 | IR1  | C16 | C24 | H24C | 44.25   |
| 220 | H24C | C24 | C16 | IR1  | 44.25   |
| 221 | H24A | C24 | C16 | C15  | 17.32   |
| 221 | C15  | C16 | C24 | H24A | 17.32   |
| 222 | H24B | C24 | C16 | C15  | -102.68 |
| 222 | C15  | C16 | C24 | H24B | -102.68 |
| 223 | H24C | C24 | C16 | C15  | 137.32  |
| 223 | C15  | C16 | C24 | H24C | 137.32  |
| 224 | H24A | C16 | C24 | C18  | -156.05 |
| 224 | C18  | C16 | C24 | H24A | -156.05 |
| 225 | C18  | C16 | C24 | H24B | 83.95   |
| 225 | H24B | C24 | C16 | C18  | 83.95   |
| 226 | H24C | C24 | C16 | C18  | -36.05  |
| 226 | C18  | C16 | C24 | H24C | -36.05  |
| 227 | C19  | C17 | C18 | IR1  | 66.80   |
| 227 | IR1  | C18 | C17 | C19  | 66.80   |
| 228 | C22  | C17 | C18 | IR1  | -124.97 |
| 228 | IR1  | C18 | C17 | C22  | -124.97 |
| 229 | C16  | C18 | C17 | IR1  | -66.80  |
| 229 | IR1  | C17 | C18 | C16  | -66.80  |
| 230 | C19  | C17 | C18 | C16  | -0.00   |
| 230 | C16  | C18 | C17 | C19  | -0.00   |
| 231 | C22  | C17 | C18 | C16  | 168.23  |
| 231 | C16  | C18 | C17 | C22  | 168.23  |
| 232 | IR1  | C17 | C18 | C23  | 122.22  |
| 232 | C23  | C18 | C17 | IR1  | 122.22  |
| 233 | C23  | C18 | C17 | C19  | -170.98 |
| 233 | C19  | C17 | C18 | C23  | -170.98 |
| 234 | C22  | C17 | C18 | C23  | -2.75   |
| 234 | C23  | C18 | C17 | C22  | -2.75   |
| 235 | H23A | C23 | C18 | IR1  | -110.43 |
| 235 | IR1  | C18 | C23 | H23A | -110.43 |
| 236 | H23B | C23 | C18 | IR1  | 129.57  |
| 236 | IR1  | C18 | C23 | H23B | 129.57  |
| 237 | IR1  | C18 | C23 | H23C | 9.57    |
| 237 | H23C | C23 | C18 | IR1  | 9.57    |
| 238 | H23A | C23 | C18 | C16  | -7.54   |
| 238 | C16  | C18 | C23 | H23A | -7.54   |
| 239 | H23B | C23 | C18 | C16  | -127.54 |
| 239 | C16  | C18 | C23 | H23B | -127.54 |
| 240 | H23C | C23 | C18 | C16  | 112.46  |
| 240 | C16  | C18 | C23 | H23C | 112.46  |
| 241 | H23A | C23 | C18 | C17  | 161.69  |
| 241 | C17  | C18 | C23 | H23A | 161.69  |
| 242 | C17  | C18 | C23 | H23B | 41.69   |
| 242 | H23B | C23 | C18 | C17  | 41.69   |
| 243 | H23C | C23 | C18 | C17  | -78.31  |
| 243 | C17  | C18 | C23 | H23C | -78.31  |
| 244 | C15  | C19 | C17 | IR1  | 66.10   |
| 244 | IR1  | C17 | C19 | C15  | 66.10   |
| 245 | C21  | C19 | C17 | IR1  | -120.40 |
| 245 | IR1  | C17 | C19 | C21  | -120.40 |
| 246 | C18  | C17 | C19 | IR1  | -66.10  |
| 246 | IR1  | C19 | C17 | C18  | -66.10  |
| 247 | C15  | C19 | C17 | C18  | 0.00    |
| 247 | C18  | C17 | C19 | C15  | 0.00    |
| 248 | C21  | C19 | C17 | C18  | 173.50  |
| 248 | C18  | C17 | C19 | C21  | 173.50  |
| 249 | IR1  | C19 | C17 | C22  | 125.49  |
| 249 | C22  | C17 | C19 | IR1  | 125.49  |
| 250 | C22  | C17 | C19 | C15  | -168.41 |
| 250 | C15  | C19 | C17 | C22  | -168.41 |
| 251 | C21  | C19 | C17 | C22  | 5.09    |
| 251 | C22  | C17 | C19 | C21  | 5.09    |
| 252 | H22A | C22 | C17 | IR1  | -138.57 |
| 252 | IR1  | C17 | C22 | H22A | -138.57 |
| 253 | H22B | C22 | C17 | IR1  | 101.43  |
| 253 | IR1  | C17 | C22 | H22B | 101.43  |
| 254 | IR1  | C17 | C22 | H22C | -18.57  |
| 254 | H22C | C22 | C17 | IR1  | -18.57  |
| 255 | H22A | C22 | C17 | C18  | -42.01  |
| 255 | C18  | C17 | C22 | H22A | -42.01  |
| 256 | H22B | C22 | C17 | C18  | -162.01 |
| 256 | C18  | C17 | C22 | H22B | -162.01 |
| 257 | H22C | C22 | C17 | C18  | 77.99   |
| 257 | C18  | C17 | C22 | H22C | 77.99   |
| 258 | C19  | C17 | C22 | H22A | 124.32  |
| 258 | H22A | C22 | C17 | C19  | 124.32  |
| 259 | H22B | C22 | C17 | C19  | 4.32    |
| 259 | C19  | C17 | C22 | H22B | 4.32    |
| 260 | H22C | C22 | C17 | C19  | -115.68 |
| 260 | C19  | C17 | C22 | H22C | -115.68 |
| 261 | H21A | C21 | C19 | IR1  | 91.27   |
| 261 | IR1  | C19 | C21 | H21A | 91.27   |
| 262 | IR1  | C19 | C21 | H21B | -28.73  |

|     |      |     |     |      |         |
|-----|------|-----|-----|------|---------|
| 262 | H21B | C21 | C19 | IR1  | -28.73  |
| 263 | H21C | C21 | C19 | IR1  | -148.73 |
| 263 | IR1  | C19 | C21 | H21C | -148.73 |
| 264 | H21A | C21 | C19 | C15  | -18.50  |
| 264 | C15  | C19 | C21 | H21A | -18.50  |
| 265 | H21B | C21 | C19 | C15  | -138.50 |
| 265 | C15  | C19 | C21 | H21B | -138.50 |
| 266 | C15  | C19 | C21 | H21C | 101.50  |
| 266 | H21C | C21 | C19 | C15  | 101.50  |
| 267 | H21A | C21 | C19 | C17  | 170.51  |
| 267 | C17  | C19 | C21 | H21A | 170.51  |
| 268 | H21B | C21 | C19 | C17  | 50.51   |
| 268 | C17  | C19 | C21 | H21B | 50.51   |
| 269 | H21C | C21 | C19 | C17  | -69.49  |
| 269 | C17  | C19 | C21 | H21C | -69.49  |

## 10. UV-vis spectroscopic monitoring of exposure of CB[6] and CB[7] to CAN

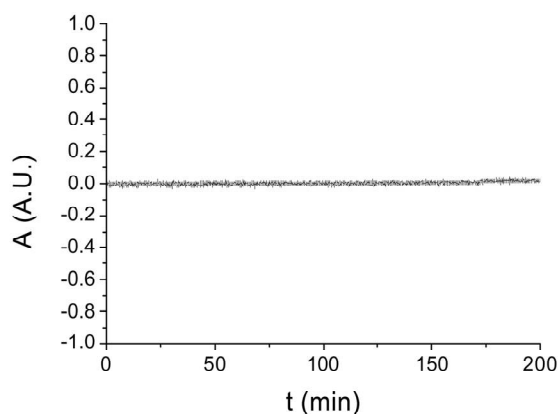

CAN (c = 0.5mM); CB[7] (m = 25μg);  
 $\lambda = 290$  nm

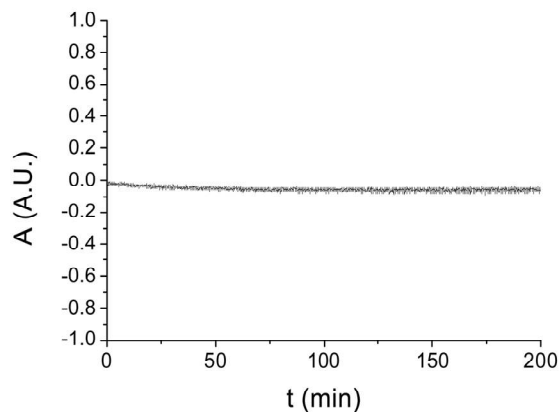

CAN (c = 0.5mM); CB[6] (m = 20μg)  
 $\lambda = 290$  nm

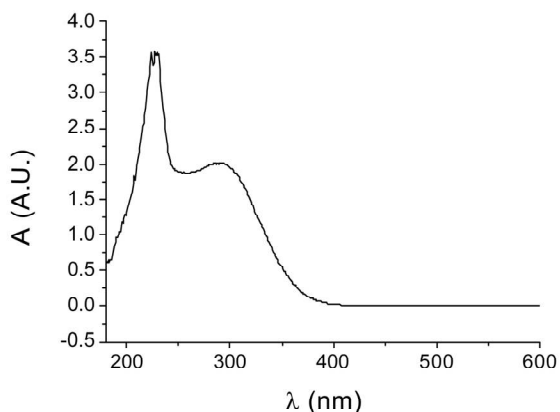

CAN absorption for c = 0.5 mM

Figure 9. In a conventional wavelength scanning UV-vis spectrometer, the reference quartz cell (1 cm optical path) was loaded with a stock solution of CAN whereas the sample cell was loaded with same solution of CAN added with CB[n] and stirred. The absorption band at 290 nm was monitored over 500 min (only a segment of 200 min corresponding to the typical time frame of a WOC experiment is shown here in two upper traces). The lower plot displays the UV-vis spectrum of the studied CAN stock solution.



### 11. $^1\text{H}$ NMR spectrum of CB[6] after treatment with CAN and catalyst 3 in the conditions of WOC.

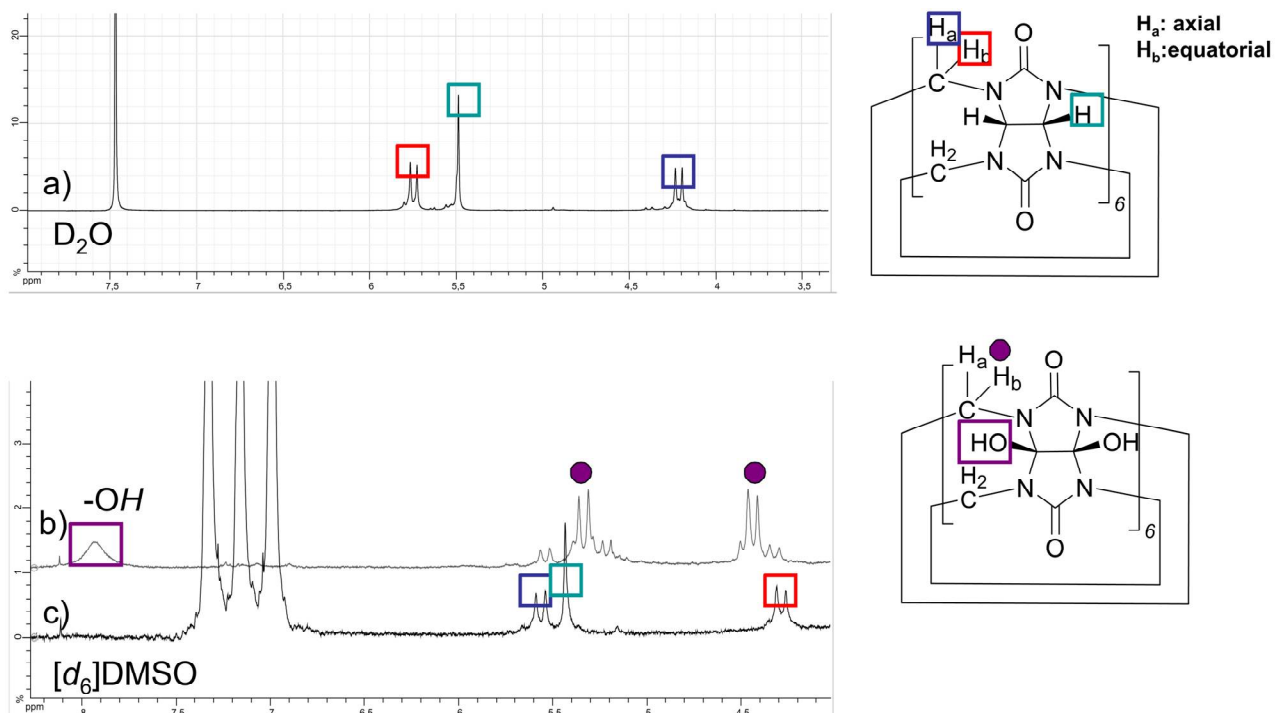

Figure 10. a)  $^1\text{H}$  NMR spectrum of a solution of CB[6] in  $\text{D}_2\text{O}$ . b)  $^1\text{H}$  NMR spectrum of a solution of  $(\text{OH})_6\text{CB}[6]$  in  $[d_6]\text{DMSO}$  contaminated with CB[6]. c)  $^1\text{H}$  NMR spectrum of the solid material recovered after a WOC experiment and upon extraction of the Ce(III) salts with a toluene solution of  $n\text{Bu}_3\text{P}(\text{O})$ .

## 12. Calorimetric titrations

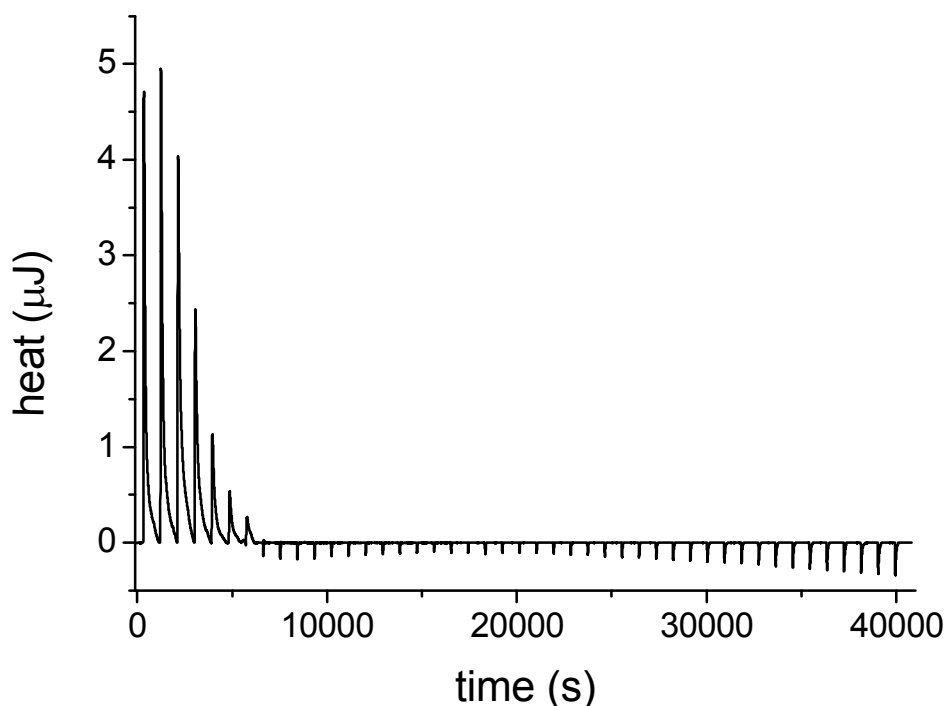

**Figure 11.** Heat released in the reaction : titration of cucurbit[7]uril water solution ( $c = 2 \text{ mM}$ ) with  $\text{IrCp}^*(\text{H}_2\text{O})_3(\text{PF}_6)_2$  complex water solution ( $c=10\text{mM}$ ). Reaction was performed on  $25^\circ\text{C}$ . Interval between injections was 900 seconds:  $\text{IrCp}^*(\text{H}_2\text{O})_3(\text{PF}_6)_2 : c=10\text{mM}$  injected into  $\text{CB}[7] : c=2\text{mM}$ . There were 45 injections (of  $2.03 \mu\text{l}$  each). Table shows the  $\Delta H$  calculated for measurements of  $\text{PF}_6^{2-}$  salt :

| $\Delta H(\text{kcal/mol})$ | Statistical analysis          |
|-----------------------------|-------------------------------|
| -3.722                      | Mean = -3.697                 |
| -3.612                      | Standard deviation = -0.07234 |
| -3.782                      |                               |
| -3.672                      | Median = -3.697               |

NOTE : Raw values for the released heat were corrected for the heat values of the dilution of Ir complex ( $c = 10\text{mM}$ ) in pure water, enthalpies were calculated by dividing the sum of all the corrected heats for the first 11 injections divided by the number of moles of Ir complex that was used in these 11 injections. Due to the well established molarity-dependence of the enthalpy of dilution, the determination of the enthalpy and constant of inclusion was not possible by using conventional ITC models.

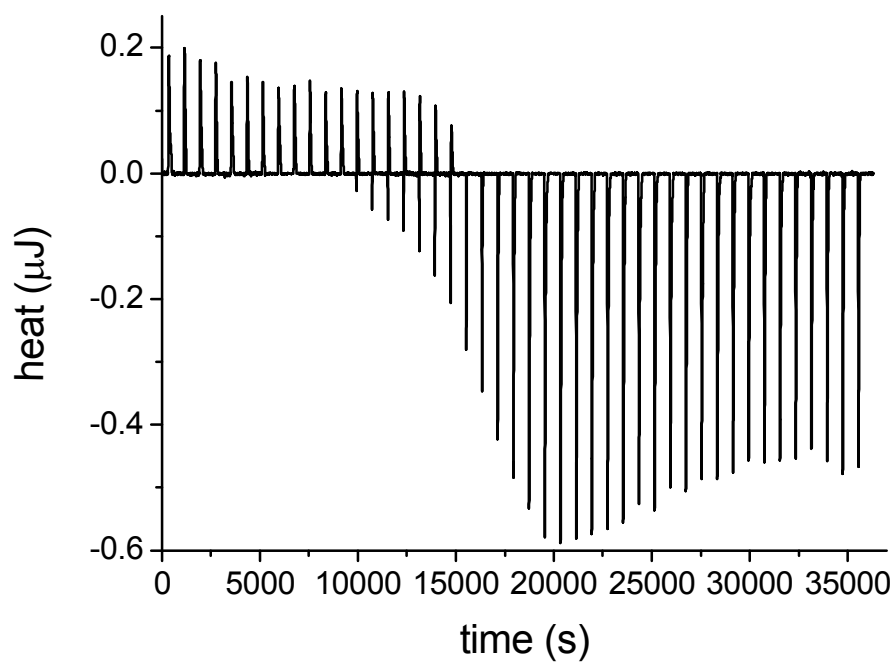

**Figure 12.** IrCp\*(H<sub>2</sub>O)<sub>3</sub>(NO<sub>3</sub>)<sub>2</sub> : *c* = 3 mM, injected into CB[7] : *c* = 0.25mM

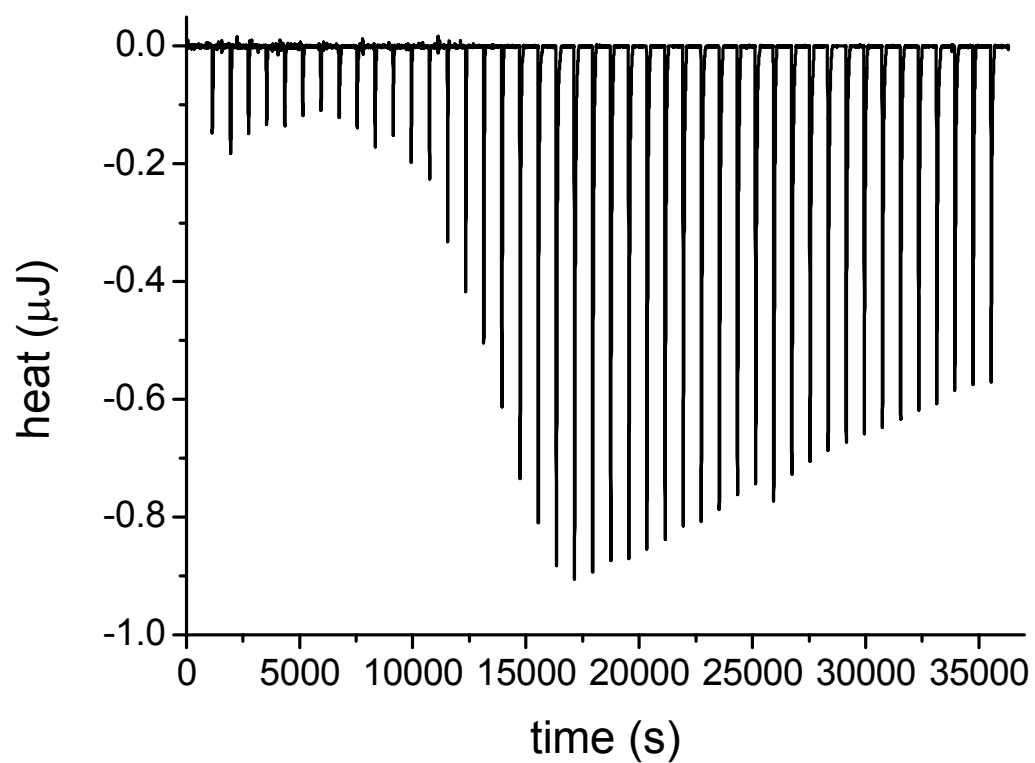

**Figure 13.** IrCp\*(H<sub>2</sub>O)<sub>3</sub>(NO<sub>3</sub>)<sub>2</sub> : *c* = 3 mM, injected into pure water.

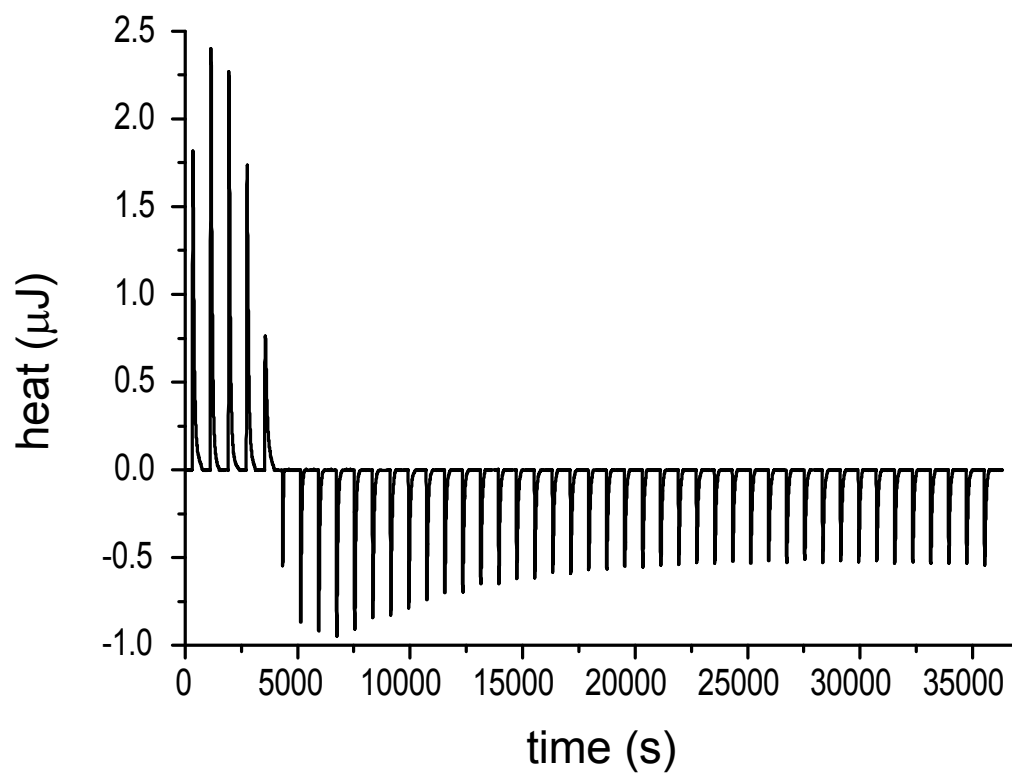

**Figure 14. Thermograph:** IrCp\*(H<sub>2</sub>O)<sub>3</sub>(PF<sub>6</sub>)<sub>2</sub> : *c*= 10 mM injected into CB[7] : *c*= 0.5 mM

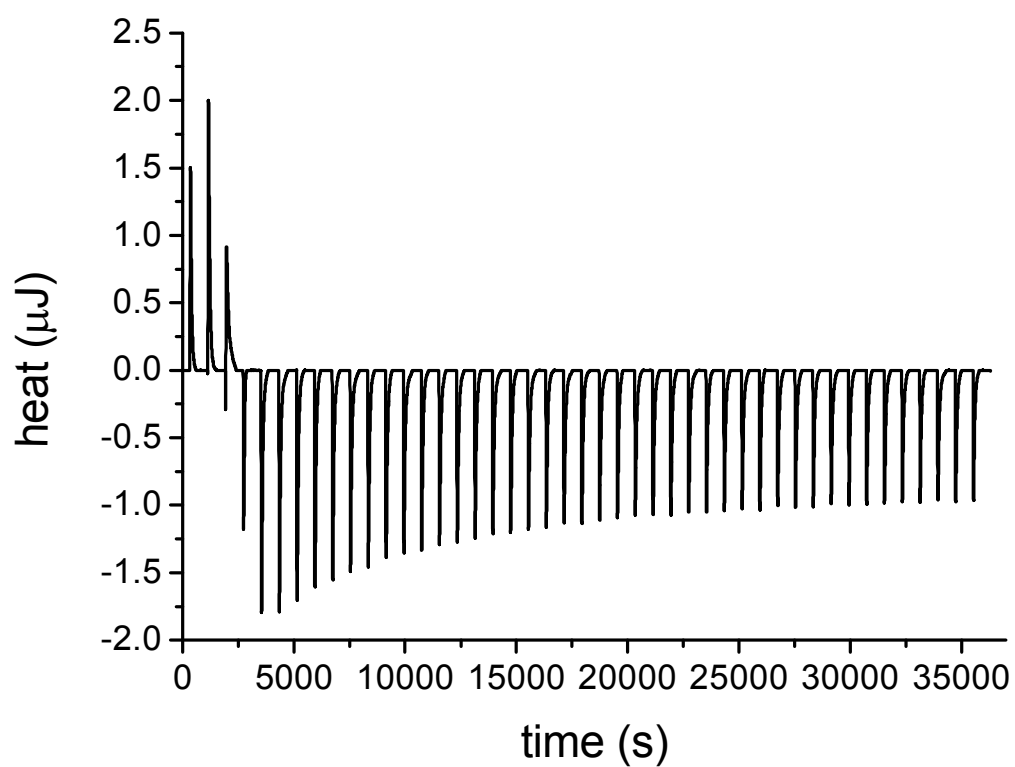

**Figure 15.** Dilution Thermograph : IrCp\*(H<sub>2</sub>O)<sub>3</sub>(PF<sub>6</sub>)<sub>2</sub> : *c* = 10 mM injected into water

### 13. Interaction of $\text{IrCp}^*(\text{H}_2\text{O})_3(\text{PF}_6)_2$ with CB[7] in water

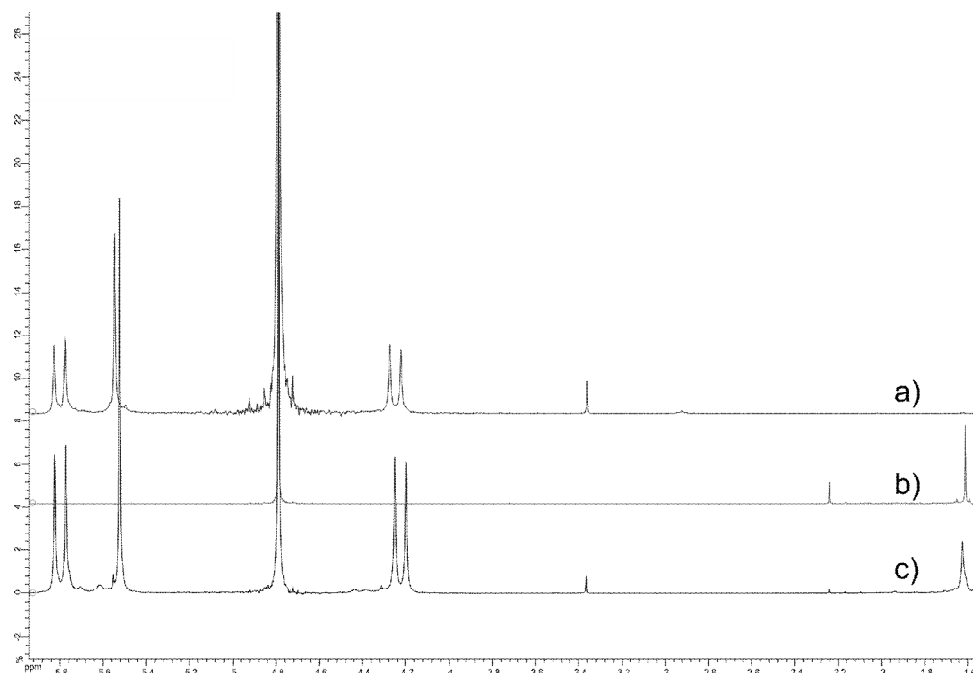

**Figure 16.**  $^1\text{H}$  NMR (300 MHz) spectra of  $\text{IrCp}^*(\text{H}_2\text{O})_3(\text{PF}_6)_2$  and CB[7] (1:4 ratio) in solution in  $\text{D}_2\text{O}$ ; a) spectrum of cucurbit[7]uril ; b) spectrum of  $\text{IrCp}^*(\text{H}_2\text{O})_3(\text{PF}_6)_2$ ; c) spectrum of  $\text{IrCp}^*(\text{H}_2\text{O})_3(\text{PF}_6)_2$  with CB[7]

Comments to Figure 11:

- a)  $\delta$  (ppm) : 4.25 (d, 2 H,  $J=15$  Hz,  $\text{CH}_2$ ); 5.55 (s, 2 H, CH); 5.8 (d, 2 H,  $J=15$  Hz,  $\text{CH}_2$ )
- b)  $\delta$  (ppm) : 1.61 (s, 15 H,  $\text{CpCH}_3$ )
- c)  $\delta$  (ppm) : 1.63 (s, 15 H,  $\text{CpCH}_3$ ); 4.23 (d, 2 H,  $J=15$  Hz,  $\text{CH}_2$ ); 5.52 (s, 2 H, CH); 5.8 (d, 2 H,  $J=15$  Hz,  $\text{CH}_2$ )

## 14. Computational material

The method is (ZORA) B-LYP-D3(0)/all electron TZP when not specified.



## Cp\*Ir(H<sub>2</sub>O)<sub>3</sub><sup>2+</sup>, gas phase

Geometry CYCLE 33

Energy gradients wrt nuclear displacements

| Atom | Cartesian (a.u./angstrom) |           |           |
|------|---------------------------|-----------|-----------|
|      | X                         | Y         | Z         |
| 1 H  | 0.000091                  | 0.000042  | 0.000000  |
| 2 H  | 0.000044                  | 0.000063  | -0.000049 |
| 3 H  | 0.000120                  | 0.000133  | 0.000016  |
| 4 Ir | -0.000269                 | -0.000158 | 0.000369  |
| 5 H  | -0.000019                 | 0.000298  | 0.000439  |
| 6 C  | 0.000294                  | 0.000241  | 0.000010  |
| 7 C  | 0.000134                  | -0.000402 | -0.000281 |
| 8 C  | 0.000315                  | -0.000036 | 0.000102  |
| 9 C  | -0.000276                 | 0.000189  | 0.000272  |
| 10 C | 0.000146                  | 0.000166  | -0.000348 |
| 11 H | -0.000514                 | 0.000251  | -0.000158 |
| 12 H | -0.000036                 | -0.000062 | 0.000032  |
| 13 H | 0.000073                  | 0.000129  | -0.000057 |
| 14 H | 0.000023                  | -0.000003 | -0.000016 |
| 15 O | 0.000984                  | -0.000832 | -0.000032 |
| 16 H | -0.000982                 | 0.000571  | -0.000336 |
| 17 O | -0.000062                 | -0.000107 | -0.000334 |
| 18 H | -0.000137                 | 0.000030  | 0.000168  |
| 19 O | 0.000532                  | -0.000734 | 0.000819  |
| 20 H | -0.000032                 | 0.000288  | -0.000547 |
| 21 C | -0.000170                 | -0.000043 | 0.000086  |
| 22 H | 0.000030                  | 0.000050  | -0.000008 |
| 23 H | -0.000033                 | -0.000107 | -0.000048 |
| 24 C | -0.000145                 | 0.000104  | -0.000026 |
| 25 H | -0.000001                 | -0.000050 | -0.000023 |
| 26 H | 0.000013                  | -0.000049 | 0.000003  |
| 27 C | -0.000021                 | -0.000032 | -0.000255 |
| 28 H | -0.000048                 | 0.000036  | 0.000056  |
| 29 H | 0.000006                  | -0.000043 | 0.000063  |
| 30 C | -0.000264                 | -0.000464 | 0.000094  |
| 31 H | 0.000022                  | 0.000061  | -0.000013 |
| 32 H | 0.000200                  | 0.000292  | 0.000038  |
| 33 C | 0.000031                  | 0.000175  | -0.000087 |
| 34 H | -0.000027                 | 0.000008  | 0.000012  |
| 35 H | -0.000021                 | -0.000007 | 0.000039  |

dE(predicted): -0.51291E-05, dE(actual): -0.34405E-05, Trust radius: 0.784141, all in a.u.

Geometry Convergence after Step 33 \*\* CONVERGED \*\*

|                          |                     |            |   |
|--------------------------|---------------------|------------|---|
| current energy           | -6.30479409 Hartree |            |   |
| energy change            | -0.00000344         | 0.00100000 | T |
| constrained gradient max | 0.00098412          | 0.00100000 | T |
| constrained gradient rms | 0.00026864          | 0.00066667 | T |
| gradient max             | 0.00098412          |            |   |
| gradient rms             | 0.00026864          |            |   |
| cart. step max           | 0.00587000          | 0.01000000 | T |
| cart. step rms           | 0.00145086          | 0.00666667 | T |

|                                                                            | hartree             | eV        | kcal/mol  | kJ/mol    |
|----------------------------------------------------------------------------|---------------------|-----------|-----------|-----------|
| <b>Pauli Repulsion</b>                                                     |                     |           |           |           |
| Kinetic (Delta T <sup>0</sup> ):                                           | 69.525027959984286  | 1891.8723 | 43627.62  | 182537.94 |
| Delta V <sup>Pauli</sup> Coulomb:                                          | -36.003876643687320 | -979.7153 | -22592.78 | -94528.16 |
| Delta V <sup>Pauli</sup> LDA-XC:                                           | -8.442151637512678  | -229.7226 | -5297.53  | -22164.87 |
| Delta V <sup>Pauli</sup> GGA-Exchange:                                     | 0.557562632729155   | 15.1721   | 349.88    | 1463.88   |
| Delta V <sup>Pauli</sup> GGA-Correlation:                                  | -0.646488352305294  | -17.5918  | -405.68   | -1697.35  |
| Total Pauli Repulsion:                                                     | 24.990073959208146  | 680.0145  | 15681.51  | 65611.43  |
| (Total Pauli Repulsion =<br>Delta E <sup>Pauli</sup> in BB paper)          |                     |           |           |           |
| <b>Steric Interaction</b>                                                  |                     |           |           |           |
| Pauli Repulsion (Delta E <sup>Pauli</sup> ):                               | 24.990073959208146  | 680.0145  | 15681.51  | 65611.43  |
| Electrostatic Interaction:                                                 | -5.222233987366392  | -142.1042 | -3277.00  | -13710.97 |
| (Electrostatic Interaction =<br>Delta V <sub>elstat</sub> in the BB paper) |                     |           |           |           |

|                                                                                                   |                     |            |           |            |
|---------------------------------------------------------------------------------------------------|---------------------|------------|-----------|------------|
| Total Steric Interaction:<br>(Total Steric Interaction =<br>Delta E <sup>0</sup> in the BB paper) | 19.767839971841752  | 537.9103   | 12404.51  | 51900.46   |
| Orbital Interactions<br>A:                                                                        | -26.020640314579254 | -708.0576  | -16328.20 | -68317.18  |
| Total Orbital Interactions:                                                                       | -26.024570317066310 | -708.1646  | -16330.67 | -68327.50  |
| Alternative Decomposition Orb.Int.                                                                |                     |            |           |            |
| Kinetic:                                                                                          | -62.486107787974220 | -1700.3335 | -39210.63 | -164057.25 |
| Coulomb:                                                                                          | 33.612813364329057  | 914.6512   | 21092.36  | 88250.43   |
| XC:                                                                                               | 2.848724106578846   | 77.5177    | 1787.60   | 7479.32    |
| Total Orbital Interactions:                                                                       | -26.024570317066317 | -708.1646  | -16330.67 | -68327.50  |
| Residu (E=Steric+OrbInt+Res):                                                                     | -0.000000536243675  | 0.0000     | 0.00      | 0.00       |
| Dispersion Energy:                                                                                | -0.048063187698335  | -1.3079    | -30.16    | -126.19    |
| Total Bonding Energy:                                                                             | -6.304794069166568  | -171.5622  | -3956.32  | -16553.23  |

Summary of Bonding Energy (energy terms are taken from the energy decomposition above)

|                                 |                    |           |          |           |
|---------------------------------|--------------------|-----------|----------|-----------|
| Electrostatic Energy:           | -5.222233987366392 | -142.1042 | -3277.00 | -13710.97 |
| Kinetic Energy:                 | 7.038920172010066  | 191.5388  | 4416.99  | 18480.68  |
| Coulomb (Steric+OrbInt) Energy: | -2.391063815601939 | -65.0642  | -1500.42 | -6277.74  |
| XC Energy:                      | -5.682353250509971 | -154.6247 | -3565.73 | -14919.02 |
| Dispersion Energy:              | -0.048063187698335 | -1.3079   | -30.16   | -126.19   |
| Total Bonding Energy:           | -6.304794069166571 | -171.5622 | -3956.32 | -16553.23 |

List of All Frequencies:

Intensities

| Frequency<br>cm-1 | Dipole Strength<br>1e-40 esu <sup>2</sup> cm <sup>2</sup> | Absorption Intensity (degeneracy not counted)<br>km/mole |
|-------------------|-----------------------------------------------------------|----------------------------------------------------------|
| 83.271686         | 116.434125                                                | 2.430277                                                 |
| 89.089438         | 72.216118                                                 | 1.612644                                                 |
| 118.691066        | 30.980081                                                 | 0.921677                                                 |
| 121.957030        | 40.783896                                                 | 1.246733                                                 |
| 124.260094        | 85.210445                                                 | 2.654010                                                 |
| 128.072901        | 20.647197                                                 | 0.662821                                                 |
| 132.227711        | 19.935374                                                 | 0.660731                                                 |
| 132.957220        | 29.048063                                                 | 0.968071                                                 |
| 136.358152        | 55.575501                                                 | 1.899514                                                 |
| 138.001753        | 76.788959                                                 | 2.656204                                                 |
| 141.625216        | 22.016681                                                 | 0.781575                                                 |
| 148.225145        | 20.721879                                                 | 0.769891                                                 |
| 169.136631        | 194.498146                                                | 8.245770                                                 |
| 189.327422        | 227.121280                                                | 10.778279                                                |
| 193.789894        | 290.856140                                                | 14.128219                                                |
| 209.547331        | 197.675610                                                | 10.382771                                                |
| 213.713455        | 219.306397                                                | 11.747927                                                |
| 254.671763        | 377.144407                                                | 24.075013                                                |
| 262.580021        | 349.791239                                                | 23.022298                                                |
| 301.179607        | 32.129988                                                 | 2.425572                                                 |
| 302.697924        | 23.851730                                                 | 1.809703                                                 |
| 303.624603        | 127.163671                                                | 9.677832                                                 |
| 304.719864        | 53.250312                                                 | 4.067251                                                 |
| 305.378300        | 44.840287                                                 | 3.432295                                                 |
| 352.431300        | 7.860829                                                  | 0.694418                                                 |
| 437.560678        | 192.854686                                                | 21.151762                                                |
| 439.397792        | 202.294910                                                | 22.280293                                                |
| 440.168360        | 181.507725                                                | 20.025898                                                |
| 488.784975        | 603.354085                                                | 73.921058                                                |
| 490.420381        | 650.750978                                                | 79.994736                                                |
| 515.047318        | 665.654284                                                | 85.935762                                                |
| 515.334034        | 202.244300                                                | 26.124211                                                |
| 516.538547        | 1910.099870                                               | 247.307269                                               |
| 547.301389        | 0.505319                                                  | 0.069322                                                 |
| 567.708494        | 18.304087                                                 | 2.604663                                                 |
| 584.072729        | 2.317542                                                  | 0.339291                                                 |
| 586.744635        | 5.153018                                                  | 0.757860                                                 |
| 597.345178        | 35.592441                                                 | 5.329190                                                 |
| 601.239324        | 27.200726                                                 | 4.099265                                                 |
| 612.232524        | 19.327687                                                 | 2.966022                                                 |
| 770.464166        | 0.862572                                                  | 0.166581                                                 |

|             |            |            |
|-------------|------------|------------|
| 774.880919  | 1.409408   | 0.273747   |
| 936.191208  | 0.124642   | 0.029249   |
| 936.615381  | 0.229282   | 0.053828   |
| 998.543168  | 129.862427 | 32.503373  |
| 1000.561142 | 98.298236  | 24.652867  |
| 1004.838003 | 38.198519  | 9.621010   |
| 1005.971746 | 58.224870  | 14.681566  |
| 1014.038812 | 45.977461  | 11.686316  |
| 1067.623021 | 34.511659  | 9.235530   |
| 1068.736540 | 33.347807  | 8.933384   |
| 1101.966880 | 0.007126   | 0.001968   |
| 1138.397050 | 0.849814   | 0.242491   |
| 1139.074412 | 0.784159   | 0.223890   |
| 1345.293819 | 8.247690   | 2.781170   |
| 1347.612249 | 3.687650   | 1.245640   |
| 1364.978064 | 42.493126  | 14.538594  |
| 1372.980497 | 31.964679  | 11.000509  |
| 1380.017798 | 70.274283  | 24.308557  |
| 1383.079265 | 28.737345  | 9.962579   |
| 1384.657473 | 14.187636  | 4.924141   |
| 1388.435440 | 51.447723  | 17.904818  |
| 1388.920910 | 44.837786  | 15.609887  |
| 1392.583165 | 19.958875  | 6.966831   |
| 1430.450043 | 0.171738   | 0.061577   |
| 1446.096515 | 77.724017  | 28.172837  |
| 1446.798362 | 15.793184  | 5.727377   |
| 1448.249495 | 36.913093  | 13.399910  |
| 1450.188766 | 100.282611 | 36.452577  |
| 1461.794545 | 0.271208   | 0.099373   |
| 1462.647027 | 4.655738   | 1.706892   |
| 1466.266934 | 32.372512  | 11.897823  |
| 1469.331422 | 52.948326  | 19.500694  |
| 1479.600670 | 62.012871  | 22.998760  |
| 1598.088469 | 65.468266  | 26.224651  |
| 1601.602556 | 296.297469 | 118.948992 |
| 1602.967660 | 306.085199 | 122.983022 |
| 2951.002748 | 14.897469  | 11.019457  |
| 2953.241203 | 4.487171   | 3.321618   |
| 2954.302427 | 14.725293  | 10.904279  |
| 2955.919020 | 11.049307  | 8.186639   |
| 2956.316945 | 23.961487  | 17.755906  |
| 3018.902339 | 4.210739   | 3.186291   |
| 3019.157492 | 5.706906   | 4.318814   |
| 3023.261175 | 3.005851   | 2.277829   |
| 3026.815222 | 10.846736  | 8.229303   |
| 3028.044388 | 5.984946   | 4.542559   |
| 3054.904568 | 0.132282   | 0.101292   |
| 3056.813116 | 4.062151   | 3.112454   |
| 3060.566204 | 4.675579   | 3.586867   |
| 3062.439659 | 0.471256   | 0.361745   |
| 3063.144321 | 1.043841   | 0.801456   |
| 3556.324893 | 204.175712 | 182.005109 |
| 3559.751500 | 112.170559 | 100.086761 |
| 3563.232635 | 122.492172 | 109.403341 |
| 3659.425192 | 156.782722 | 143.810019 |
| 3659.735022 | 90.540056  | 83.055514  |
| 3663.003251 | 111.677734 | 102.537322 |

Statistical Thermal Analysis \*\*\* ideal gas assumed \*\*\*

Pressure: 1.000000 atm.  
 Temperature: 298.150000 K

Moments of Inertia (and direction vectors)  
 =====

|           |           |           |
|-----------|-----------|-----------|
| 3045.5131 | 3508.9488 | 3512.4547 |
| -----     | -----     | -----     |
| -0.0770   | 0.8705    | 0.4861    |
| -0.8496   | -0.3124   | 0.4248    |
| 0.5217    | -0.3803   | 0.7637    |

The rotational contribution to the molecular entropy includes a term, dependent on the symmetry number sigma. The results reported below were computed using sigma = 1, determined from the point group symmetry of the input geometry (NOSYM). If this is not the correct symmetry, please contact SCM to report a bug.

| Temp   |                                             | Transl | Rotat  | Vibrat  | Total   |
|--------|---------------------------------------------|--------|--------|---------|---------|
| ----   |                                             | -----  | -----  | -----   | -----   |
| 298.15 | Entropy (cal/mole-K):                       | 43.714 | 31.996 | 69.981  | 145.691 |
|        | Internal Energy (Kcal/mole):                | 0.889  | 0.889  | 192.649 | 194.426 |
|        | Constant Volume Heat Capacity (cal/mole-K): | 2.981  | 2.981  | 71.288  | 77.250  |

\*\*\*\*\*

\*\*\* DONE CALCULATING ANALYTICAL SECOND DERIVATIVES OF THE ENERGY \*\*\*

## CB7, gas phase.

Geometry CYCLE 8

Energy gradients wrt nuclear displacements

| Atom | Cartesian (a.u./angstrom) |           |           |
|------|---------------------------|-----------|-----------|
|      | X                         | Y         | Z         |
| 1 H  | -0.000010                 | 0.000133  | -0.000015 |
| 2 C  | -0.000147                 | 0.000009  | 0.000013  |
| 3 C  | 0.000053                  | 0.000090  | 0.000275  |
| 4 H  | -0.000005                 | 0.000019  | 0.000010  |
| 5 H  | 0.000038                  | 0.000049  | -0.000118 |
| 6 C  | -0.000338                 | 0.000153  | -0.000330 |
| 7 C  | -0.000179                 | -0.000080 | 0.000251  |
| 8 H  | 0.000077                  | 0.000112  | -0.000020 |
| 9 H  | -0.000025                 | 0.000009  | 0.000024  |
| 10 C | 0.000187                  | -0.000072 | 0.000047  |
| 11 C | 0.000092                  | 0.000057  | 0.000146  |
| 12 H | 0.000140                  | -0.000059 | 0.000066  |
| 13 H | 0.000139                  | -0.000126 | -0.000052 |
| 14 C | -0.000136                 | 0.000236  | -0.000199 |
| 15 C | -0.000066                 | -0.000076 | 0.000011  |
| 16 H | -0.000127                 | -0.000060 | -0.000144 |
| 17 H | -0.000060                 | -0.000026 | -0.000111 |
| 18 C | -0.000006                 | 0.000339  | -0.000019 |
| 19 C | 0.000176                  | 0.000018  | 0.000075  |
| 20 H | -0.000050                 | 0.000038  | -0.000033 |
| 21 H | -0.000026                 | -0.000018 | -0.000063 |
| 22 C | 0.000140                  | 0.000178  | -0.000017 |
| 23 C | -0.000108                 | -0.000054 | 0.000135  |
| 24 H | -0.000046                 | -0.000029 | 0.000155  |
| 25 H | -0.000130                 | 0.000005  | 0.000119  |
| 26 C | -0.000090                 | -0.000059 | 0.000135  |
| 27 C | 0.000117                  | -0.000114 | 0.000126  |
| 28 H | -0.000016                 | 0.000023  | -0.000080 |
| 29 H | 0.000038                  | 0.000120  | -0.000060 |
| 30 O | -0.000007                 | 0.000109  | -0.000013 |
| 31 O | 0.000098                  | 0.000031  | -0.000043 |
| 32 O | -0.000007                 | 0.000052  | -0.000183 |
| 33 O | 0.000013                  | 0.000294  | -0.000733 |
| 34 O | 0.000042                  | 0.000326  | -0.000402 |
| 35 O | 0.000124                  | -0.000134 | -0.000104 |
| 36 O | -0.000177                 | 0.000124  | -0.000142 |
| 37 O | 0.000093                  | 0.000095  | 0.000143  |
| 38 O | 0.000017                  | -0.000098 | 0.000202  |
| 39 O | 0.000084                  | -0.000065 | 0.000078  |
| 40 O | 0.000158                  | -0.000156 | 0.000109  |
| 41 O | 0.000070                  | -0.000104 | 0.000174  |
| 42 O | -0.000130                 | 0.000032  | 0.000020  |
| 43 O | 0.000044                  | 0.000002  | 0.000168  |
| 44 N | -0.000328                 | -0.000370 | 0.000106  |
| 45 N | 0.000357                  | 0.000353  | -0.000199 |
| 46 N | -0.000176                 | 0.000516  | 0.000213  |
| 47 N | -0.000012                 | -0.000497 | 0.000141  |
| 48 N | 0.000201                  | -0.000130 | -0.000059 |
| 49 N | 0.000016                  | 0.000111  | -0.000184 |
| 50 N | -0.000572                 | -0.000256 | 0.000080  |
| 51 N | -0.000156                 | 0.000089  | 0.000092  |
| 52 N | 0.000147                  | 0.000271  | -0.000275 |
| 53 N | 0.000084                  | 0.000192  | -0.000042 |
| 54 N | 0.000054                  | -0.000430 | -0.000814 |
| 55 N | 0.000037                  | -0.000179 | -0.000355 |
| 56 N | 0.000127                  | 0.000062  | -0.000267 |
| 57 N | -0.000383                 | 0.000023  | 0.000193  |
| 58 N | 0.000506                  | 0.000337  | 0.000132  |
| 59 N | -0.000141                 | -0.000128 | -0.000144 |
| 60 N | 0.000174                  | -0.000190 | -0.000032 |
| 61 N | 0.000377                  | 0.000254  | 0.000386  |
| 62 N | 0.000058                  | -0.000088 | -0.000112 |
| 63 N | 0.000119                  | -0.000338 | 0.000230  |
| 64 N | 0.000319                  | -0.000191 | -0.000074 |
| 65 N | -0.000281                 | -0.000066 | 0.000343  |
| 66 N | -0.000205                 | -0.000385 | -0.000001 |
| 67 N | -0.000352                 | -0.000660 | -0.000035 |
| 68 N | 0.000005                  | -0.000110 | 0.000211  |
| 69 N | 0.000250                  | -0.000011 | 0.000327  |
| 70 N | -0.000165                 | 0.000194  | 0.000245  |
| 71 N | -0.000022                 | 0.000004  | 0.000043  |
| 72 C | -0.000127                 | -0.000109 | 0.000231  |

```

73 C    0.000157 -0.000159 -0.000163
74 H   -0.000025  0.000037  0.000120
75 H    0.000008  0.000037 -0.000018
76 C    0.000049 -0.000175 -0.000085
77 C   -0.000159  0.000267 -0.000171
78 H    0.000029 -0.000075  0.000118
79 H    0.000083 -0.000028 -0.000025
80 C    0.000156 -0.000058 -0.000127
81 C    0.000007  0.000038 -0.000039
82 H    0.000053  0.000013  0.000056
83 H   -0.000009  0.000065  0.000096
84 C    0.000275 -0.000289  0.000427
85 C   -0.000115 -0.000044 -0.000194
86 H    0.000134  0.000055 -0.000114
87 H    0.000010  0.000098 -0.000092
88 C   -0.000315 -0.000258  0.000366
89 C   -0.000221  0.000050  0.000085
90 H    0.000029 -0.000029 -0.000082
91 H   -0.000058 -0.000068  0.000050
92 C    0.000101  0.000443  0.000525
93 C   -0.000073  0.000002  0.000001
94 H   -0.000003 -0.000124  0.000022
95 H    0.000080 -0.000213  0.000071
96 C    0.000237 -0.000034  0.000143
97 C    0.000040  0.000154 -0.000202
98 H   -0.000179 -0.000034 -0.000019
99 H   -0.000116  0.000000 -0.000114
100 C  -0.000015 -0.000026 -0.000222
101 H    0.000011  0.000052 -0.000120
102 C  -0.000104  0.000141 -0.000347
103 H  -0.000006  0.000071  0.000061
104 C  -0.000169  0.000100  0.000131
105 H    0.000082  0.000050 -0.000010
106 C    0.000136  0.000215 -0.000192
107 H  -0.000040  0.000042 -0.000011
108 C  -0.000389 -0.000015  0.000139
109 H    0.000096 -0.000009 -0.000011
110 C    0.000178  0.000485  0.000428
111 H    0.000066 -0.000200 -0.000046
112 C  -0.000067  0.000040 -0.000256
113 H    0.000052  0.000021  0.000107
114 C    0.000088 -0.000082  0.000081
115 H  -0.000019 -0.000029 -0.000166
116 C    0.000082 -0.000154 -0.000138
117 H  -0.000126  0.000086 -0.000047
118 C  -0.000085  0.000097  0.000047
119 H    0.000015 -0.000083 -0.000021
120 C    0.000162  0.000001  0.000104
121 H  -0.000130 -0.000046  0.000009
122 C  -0.000335  0.000091 -0.000032
123 H    0.000145 -0.000033  0.000029
124 C    0.000230  0.000236 -0.000033
125 H  -0.000036 -0.000129  0.000115
126 C    0.000041 -0.000189 -0.000216
    
```

-----  
 Geometry Convergence after Step 8  
 -----

```

current energy                -29.92083518 Hartree
energy change                 -0.00009261    0.00100000    T
constrained gradient max      0.00081435    0.00100000    T
constrained gradient rms      0.00017859    0.00066667    T
gradient max                   0.00081435
gradient rms                    0.00017859
cart. step max                  0.00968254    0.01000000    T
cart. step rms                  0.00272179    0.00666667    T
    
```

|                                                                   | hartree                    | eV               | kcal/mol        | kJ/mol           |
|-------------------------------------------------------------------|----------------------------|------------------|-----------------|------------------|
|                                                                   | -----                      | -----            | -----           | -----            |
| <b>Pauli Repulsion</b>                                            |                            |                  |                 |                  |
| Kinetic (Delta T <sup>0</sup> ):                                  | 391.573919567982500        | 10655.2685       | 245716.37       | 1028077.18       |
| Delta V <sup>Pauli</sup> Coulomb:                                 | -203.720493469521585       | -5543.5167       | -127836.55      | -534868.08       |
| Delta V <sup>Pauli</sup> LDA-XC:                                  | -47.522622248611412        | -1293.1563       | -29820.90       | -124770.63       |
| Delta V <sup>Pauli</sup> GGA-Exchange:                            | 2.862158965663355          | 77.8833          | 1796.03         | 7514.60          |
| Delta V <sup>Pauli</sup> GGA-Correlation:                         | -3.369642246255633         | -91.6926         | -2114.48        | -8846.99         |
| <b>Total Pauli Repulsion:</b>                                     | <b>139.823320569257220</b> | <b>3804.7861</b> | <b>87740.47</b> | <b>367106.08</b> |
| (Total Pauli Repulsion =<br>Delta E <sup>Pauli</sup> in BB paper) |                            |                  |                 |                  |
| <b>Steric Interaction</b>                                         |                            |                  |                 |                  |
| Pauli Repulsion (Delta E <sup>Pauli</sup> ):                      | 139.823320569257220        | 3804.7861        | 87740.47        | 367106.08        |

|                                                                                               |                      |            |            |            |
|-----------------------------------------------------------------------------------------------|----------------------|------------|------------|------------|
| Electrostatic Interaction:<br>(Electrostatic Interaction =<br>Delta V_elstat in the BB paper) | -30.819827397483877  | -838.6502  | -19339.74  | -80917.45  |
| -----                                                                                         |                      |            |            |            |
| Total Steric Interaction:<br>(Total Steric Interaction =<br>Delta E^0 in the BB paper)        | 109.003493171773343  | 2966.1360  | 68400.73   | 286188.63  |
| -----                                                                                         |                      |            |            |            |
| Orbital Interactions                                                                          |                      |            |            |            |
| A:                                                                                            | -138.670266228749483 | -3773.4099 | -87016.91  | -364078.73 |
| -----                                                                                         |                      |            |            |            |
| Total Orbital Interactions:                                                                   | -138.670266228749369 | -3773.4099 | -87016.91  | -364078.73 |
| -----                                                                                         |                      |            |            |            |
| Alternative Decomposition Orb.Int.                                                            |                      |            |            |            |
| Kinetic:                                                                                      | -362.345625644161714 | -9859.9262 | -227375.34 | -951338.31 |
| Coulomb:                                                                                      | 204.509300593479992  | 5564.9812  | 128331.54  | 536939.09  |
| XC:                                                                                           | 19.166058821932271   | 521.5350   | 12026.88   | 50320.48   |
| -----                                                                                         |                      |            |            |            |
| Total Orbital Interactions:                                                                   | -138.670266228749455 | -3773.4099 | -87016.91  | -364078.73 |
| -----                                                                                         |                      |            |            |            |
| Residu (E=Steric+OrbInt+Res):                                                                 | -0.000058107784269   | -0.0016    | -0.04      | -0.15      |
| Dispersion Energy:                                                                            | -0.253801186119520   | -6.9063    | -159.26    | -666.35    |
| -----                                                                                         |                      |            |            |            |
| Total Bonding Energy:                                                                         | -29.920632350879817  | -814.1818  | -18775.48  | -78556.61  |

Summary of Bonding Energy (energy terms are taken from the energy decomposition above)

|                                 |                     |           |           |           |
|---------------------------------|---------------------|-----------|-----------|-----------|
| Electrostatic Energy:           | -30.819827397483877 | -838.6502 | -19339.74 | -80917.45 |
| Kinetic Energy:                 | 29.228293923820786  | 795.3423  | 18341.03  | 76738.87  |
| Coulomb (Steric+OrbInt) Energy: | 0.788749016174137   | 21.4630   | 494.95    | 2070.86   |
| XC Energy:                      | -28.864046707271424 | -785.4307 | -18112.46 | -75782.54 |
| Dispersion Energy:              | -0.253801186119520  | -6.9063   | -159.26   | -666.35   |
| -----                           |                     |           |           |           |
| Total Bonding Energy:           | -29.920632350879899 | -814.1818 | -18775.48 | -78556.61 |

List of All Frequencies:

Intensities

=====

| Frequency<br>cm-1 | Dipole Strength<br>1e-40 esu2 cm2 | Absorption Intensity (degeneracy not counted)<br>km/mole |
|-------------------|-----------------------------------|----------------------------------------------------------|
| -----             | -----                             | -----                                                    |
| 12.805815         | 0.000000                          | 0.000000                                                 |
| 17.141498         | 0.000000                          | 0.000000                                                 |
| 18.794241         | 0.000000                          | 0.000000                                                 |
| 27.639151         | 0.389790                          | 0.002700                                                 |
| 34.189983         | 4.825554                          | 0.041355                                                 |
| 35.827793         | 3.968126                          | 0.035636                                                 |
| 40.457208         | 6.474989                          | 0.065662                                                 |
| 49.918136         | 21.241109                         | 0.265775                                                 |
| 53.525446         | 15.113332                         | 0.202768                                                 |
| 58.470630         | 7.065432                          | 0.103551                                                 |
| 59.947674         | 4.315832                          | 0.064851                                                 |
| 65.331503         | 13.797259                         | 0.225940                                                 |
| 66.647641         | 1.905922                          | 0.031840                                                 |
| 80.527441         | 131.883086                        | 2.662018                                                 |
| 82.154411         | 476.348605                        | 9.809206                                                 |
| 83.219182         | 91.579400                         | 1.910290                                                 |
| 84.892541         | 70.854323                         | 1.507697                                                 |
| 88.152814         | 279.298392                        | 6.171386                                                 |
| 91.029990         | 92.243154                         | 2.104732                                                 |
| 91.684920         | 320.297261                        | 7.360871                                                 |
| 94.776990         | 176.533289                        | 4.193799                                                 |
| 97.786247         | 129.055974                        | 3.163253                                                 |
| 99.236835         | 277.405570                        | 6.900271                                                 |
| 100.712787        | 23.691075                         | 0.598064                                                 |
| 108.091194        | 89.234479                         | 2.417693                                                 |
| 120.608865        | 69.921946                         | 2.113834                                                 |
| 136.219962        | 0.830567                          | 0.028359                                                 |
| 136.793104        | 21.238712                         | 0.728233                                                 |
| 138.884997        | 93.237678                         | 3.245823                                                 |
| 141.501711        | 1.270085                          | 0.045048                                                 |
| 145.082132        | 3.896292                          | 0.141691                                                 |
| 146.445663        | 3.102227                          | 0.113875                                                 |
| 154.631327        | 0.377216                          | 0.014621                                                 |
| 155.975988        | 4.558124                          | 0.178206                                                 |
| 167.272167        | 19.467577                         | 0.816232                                                 |
| 171.398111        | 28.360203                         | 1.218410                                                 |
| 174.494195        | 29.597871                         | 1.294552                                                 |
| 176.342265        | 8.170679                          | 0.361154                                                 |

|            |            |           |
|------------|------------|-----------|
| 180.085311 | 12.697557  | 0.573161  |
| 180.708207 | 18.000774  | 0.815356  |
| 185.130028 | 1.328588   | 0.061652  |
| 198.161725 | 0.259998   | 0.012914  |
| 207.470858 | 0.011416   | 0.000594  |
| 217.104343 | 26.146107  | 1.422832  |
| 219.744663 | 18.652538  | 1.027388  |
| 225.999817 | 15.716281  | 0.890299  |
| 226.339386 | 33.040110  | 1.874475  |
| 229.738310 | 22.267588  | 1.282285  |
| 250.556455 | 25.616094  | 1.608780  |
| 251.708243 | 14.239204  | 0.898382  |
| 254.203890 | 37.637800  | 2.398195  |
| 254.843137 | 12.870418  | 0.822136  |
| 278.024599 | 1.767493   | 0.123174  |
| 281.040355 | 9.158670   | 0.645177  |
| 281.641949 | 4.625259   | 0.326521  |
| 282.607317 | 2.260876   | 0.160154  |
| 310.805360 | 10.973597  | 0.854900  |
| 316.198823 | 2.284772   | 0.181084  |
| 319.250290 | 56.306433  | 4.505753  |
| 320.633363 | 38.041292  | 3.057328  |
| 331.627826 | 0.069492   | 0.005777  |
| 339.685655 | 0.811458   | 0.069091  |
| 340.586008 | 18.223716  | 1.555757  |
| 346.156290 | 3.708399   | 0.321764  |
| 354.952007 | 818.144863 | 72.791038 |
| 356.491085 | 861.733288 | 77.001576 |
| 359.074018 | 8.809114   | 0.792856  |
| 359.703055 | 15.656151  | 1.411585  |
| 359.914965 | 17.763749  | 1.602554  |
| 363.533247 | 2.835490   | 0.258375  |
| 364.924253 | 4.953239   | 0.453075  |
| 368.466014 | 7.952960   | 0.734521  |
| 369.206555 | 14.527953  | 1.344472  |
| 373.317097 | 1.580008   | 0.147848  |
| 374.137488 | 3.734010   | 0.350175  |
| 403.253749 | 0.706806   | 0.071442  |
| 403.984650 | 2.646890   | 0.268027  |
| 407.994681 | 0.115564   | 0.011818  |
| 411.098280 | 24.817762  | 2.557327  |
| 412.464288 | 156.178189 | 16.146738 |
| 414.819628 | 206.101258 | 21.429795 |
| 424.897326 | 0.977228   | 0.104078  |
| 425.656324 | 1.838645   | 0.196171  |
| 426.974496 | 0.301903   | 0.032311  |
| 431.002228 | 1.003601   | 0.108422  |
| 441.993000 | 3.416798   | 0.378541  |
| 442.676874 | 2.481351   | 0.275330  |
| 499.504137 | 0.506532   | 0.063420  |
| 499.630837 | 0.426252   | 0.053382  |
| 557.657866 | 9.838712   | 1.375258  |
| 558.210487 | 29.098336  | 4.071404  |
| 586.470487 | 4.866882   | 0.715443  |
| 586.774994 | 7.195807   | 1.058350  |
| 593.982389 | 60.980223  | 9.079055  |
| 596.066432 | 75.258410  | 11.244180 |
| 601.216716 | 9.653895   | 1.454828  |
| 601.876317 | 20.566414  | 3.102729  |
| 602.618279 | 117.544599 | 17.755097 |
| 606.342818 | 94.749863  | 14.400411 |
| 608.366482 | 9.094317   | 1.386799  |
| 611.040627 | 11.656748  | 1.785359  |
| 627.399536 | 0.808299   | 0.127114  |
| 628.392677 | 0.261549   | 0.041197  |
| 629.046885 | 1.408224   | 0.222041  |
| 632.960940 | 44.832960  | 7.112993  |
| 634.105791 | 1.982569   | 0.315114  |
| 640.671395 | 554.190955 | 88.996482 |
| 642.060823 | 127.373465 | 20.499025 |
| 647.887382 | 0.684807   | 0.111211  |
| 651.040412 | 197.583609 | 32.243110 |
| 651.580359 | 158.211871 | 25.839560 |
| 656.662789 | 1.477285   | 0.243156  |
| 662.788329 | 4.348818   | 0.722477  |
| 671.410018 | 258.683952 | 43.534682 |
| 671.989081 | 270.253991 | 45.521064 |
| 684.966394 | 4.612482   | 0.791921  |
| 685.691273 | 1.231628   | 0.211683  |
| 686.427304 | 3.786596   | 0.651511  |
| 688.586887 | 0.448262   | 0.077369  |
| 697.397311 | 3.738506   | 0.653516  |
| 699.436825 | 0.135164   | 0.023697  |
| 702.905370 | 0.159235   | 0.028055  |
| 703.497767 | 0.474881   | 0.083739  |



|             |             |            |
|-------------|-------------|------------|
| 704.036839  | 0.348085    | 0.061427   |
| 705.423642  | 1.920407    | 0.339564   |
| 706.728961  | 0.802434    | 0.142148   |
| 706.916684  | 1.393268    | 0.246877   |
| 709.856011  | 4.001816    | 0.712042   |
| 710.810335  | 4.017354    | 0.715767   |
| 713.222863  | 24.040388   | 4.297786   |
| 713.488572  | 21.901980   | 3.916954   |
| 714.964983  | 9.882955    | 1.771127   |
| 718.595538  | 349.813104  | 63.008430  |
| 746.929686  | 29.967430   | 5.610574   |
| 748.351936  | 4.128398    | 0.774400   |
| 753.462267  | 3.233884    | 0.610751   |
| 754.466181  | 3.045891    | 0.576013   |
| 759.129588  | 30.078079   | 5.723268   |
| 761.691233  | 337.497177  | 64.435792  |
| 763.091477  | 61.471440   | 11.757854  |
| 768.885183  | 4753.325327 | 916.087804 |
| 770.548874  | 4451.019423 | 859.681835 |
| 772.378793  | 1114.883199 | 215.842907 |
| 773.668385  | 84.903491   | 16.464876  |
| 789.502338  | 138.825603  | 27.472682  |
| 789.864790  | 85.152250   | 16.858811  |
| 794.173483  | 12.039088   | 2.396553   |
| 805.102990  | 70.335898   | 14.194057  |
| 806.049549  | 13.863611   | 2.801020   |
| 806.242004  | 197.713818  | 39.955863  |
| 807.845189  | 26.210726   | 5.307442   |
| 809.554328  | 113.601726  | 23.052021  |
| 811.384957  | 154.612285  | 31.444813  |
| 812.759209  | 100.021742  | 20.376725  |
| 872.305655  | 4.523202    | 0.988992   |
| 873.341610  | 33.209410   | 7.269815   |
| 875.924648  | 41.997160   | 9.220718   |
| 885.418878  | 0.283341    | 0.062884   |
| 886.461918  | 0.432806    | 0.096168   |
| 901.570700  | 0.497228    | 0.112366   |
| 901.718763  | 0.516450    | 0.116729   |
| 923.918959  | 0.701281    | 0.162407   |
| 925.117030  | 0.559366    | 0.129709   |
| 934.290770  | 36.019065   | 8.435145   |
| 935.346412  | 1.250267    | 0.293125   |
| 944.029719  | 11.680427   | 2.763901   |
| 944.139087  | 34.975184   | 8.277021   |
| 945.395791  | 13.092888   | 3.102610   |
| 946.246084  | 281.253353  | 66.708300  |
| 948.509153  | 1421.369987 | 337.929992 |
| 949.120497  | 1277.156488 | 303.839013 |
| 949.589348  | 164.757278  | 39.215568  |
| 951.575350  | 176.264004  | 42.042147  |
| 951.859264  | 31.117077   | 7.424199   |
| 960.716220  | 28.023475   | 6.748312   |
| 963.524295  | 4.475629    | 1.080923   |
| 963.939411  | 30.172601   | 7.290219   |
| 964.717708  | 0.282041    | 0.068201   |
| 971.571406  | 0.671194    | 0.163456   |
| 974.647768  | 1.737213    | 0.424403   |
| 984.006086  | 0.068193    | 0.016820   |
| 984.518177  | 0.122795    | 0.030303   |
| 992.335871  | 0.083126    | 0.020676   |
| 993.685431  | 0.045663    | 0.011373   |
| 994.211624  | 0.191296    | 0.047672   |
| 1006.180379 | 4.255344    | 1.073219   |
| 1008.079447 | 0.049170    | 0.012424   |
| 1011.159255 | 0.073243    | 0.018564   |
| 1011.760348 | 0.126787    | 0.032154   |
| 1044.310540 | 0.062318    | 0.016312   |
| 1044.680393 | 0.245464    | 0.064276   |
| 1059.898926 | 9.910845    | 2.633014   |
| 1063.536967 | 10.206910   | 2.720977   |
| 1065.763243 | 9.734780    | 2.600548   |
| 1073.203106 | 100.205403  | 26.955732  |
| 1076.467841 | 20.831902   | 5.620928   |
| 1080.741357 | 35.249931   | 9.549005   |
| 1081.349832 | 7.489362    | 2.029968   |
| 1085.567171 | 41.121523   | 11.189327  |
| 1090.022116 | 13.483795   | 3.684050   |
| 1104.200098 | 5.439741    | 1.505581   |
| 1105.804531 | 57.323571   | 15.888748  |
| 1115.706894 | 6.843291    | 1.913785   |
| 1137.353693 | 1.729173    | 0.492960   |
| 1143.225544 | 7.823099    | 2.241758   |
| 1144.284825 | 1469.298009 | 421.426750 |
| 1144.597657 | 1909.287677 | 547.775107 |
| 1146.804620 | 1355.152801 | 389.543329 |

|             |             |            |
|-------------|-------------|------------|
| 1147.311507 | 1622.162386 | 466.502254 |
| 1148.650424 | 1163.817965 | 335.081927 |
| 1160.441741 | 340.991883  | 99.184876  |
| 1163.777171 | 14.437030   | 4.211393   |
| 1164.744821 | 3.279383    | 0.957417   |
| 1165.695644 | 12.861936   | 3.758111   |
| 1179.735685 | 123.959524  | 36.655799  |
| 1180.460303 | 491.847936  | 145.532607 |
| 1181.437753 | 32.762642   | 9.702146   |
| 1182.594134 | 583.656779  | 173.010047 |
| 1184.588933 | 3157.565626 | 937.557963 |
| 1185.194426 | 3304.557924 | 981.705083 |
| 1191.130104 | 481.501516  | 143.758963 |
| 1191.723783 | 675.819299  | 201.875803 |
| 1193.911692 | 916.534149  | 274.283022 |
| 1194.381492 | 804.761723  | 240.928650 |
| 1197.745029 | 822.536416  | 246.943490 |
| 1198.351565 | 568.867319  | 170.872944 |
| 1202.854166 | 1134.195797 | 341.962970 |
| 1205.374056 | 111.086104  | 33.562913  |
| 1208.375732 | 184.497446  | 55.881805  |
| 1211.303318 | 176.200326  | 53.498017  |
| 1215.155575 | 873.311948  | 265.998603 |
| 1228.932081 | 25.503829   | 7.856178   |
| 1230.065210 | 14.168202   | 4.368385   |
| 1232.254674 | 28.672941   | 8.856269   |
| 1235.448926 | 77.139809   | 23.888090  |
| 1239.037325 | 402.870393  | 125.120310 |
| 1239.838508 | 401.489291  | 124.772006 |
| 1241.907189 | 480.586250  | 149.602397 |
| 1243.142510 | 403.537198  | 125.742636 |
| 1243.695064 | 246.499779  | 76.843744  |
| 1245.050932 | 99.763998   | 31.134295  |
| 1250.015498 | 106.113869  | 33.248007  |
| 1250.669384 | 2.850003    | 0.893441   |
| 1251.706282 | 5.276613    | 1.655525   |
| 1252.412716 | 66.608974   | 20.910204  |
| 1274.576691 | 31.483121   | 10.058236  |
| 1275.347874 | 5.158568    | 1.649058   |
| 1281.997449 | 9.006467    | 2.894141   |
| 1282.820414 | 46.607249   | 14.986403  |
| 1285.878798 | 243.058338  | 78.340913  |
| 1289.039588 | 2733.418725 | 883.182573 |
| 1290.644634 | 3073.925430 | 994.438840 |
| 1304.861015 | 45.265884   | 14.805168  |
| 1305.262628 | 16.299656   | 5.332789   |
| 1305.707923 | 25.552113   | 8.362785   |
| 1306.180541 | 236.288916  | 77.361455  |
| 1306.641925 | 12.783418   | 4.186794   |
| 1307.792822 | 37.390247   | 12.256751  |
| 1308.071536 | 43.582977   | 14.289810  |
| 1340.604960 | 192.351531  | 64.636010  |
| 1343.390168 | 2101.005958 | 707.469171 |
| 1344.761783 | 1902.827988 | 641.391144 |
| 1360.300399 | 64.607387   | 22.029015  |
| 1360.478602 | 13.408914   | 4.572602   |
| 1368.339681 | 85.229506   | 29.232231  |
| 1368.643560 | 469.541484  | 161.080288 |
| 1370.493311 | 269.196199  | 92.474909  |
| 1372.813128 | 36.243454   | 12.471511  |
| 1373.244610 | 9.677149    | 3.330991   |
| 1375.695915 | 17.800942   | 6.138235   |
| 1376.324354 | 185.141858  | 63.870966  |
| 1377.350019 | 20.664705   | 7.134304   |
| 1377.603249 | 9.031355    | 3.118568   |
| 1379.317695 | 165.323746  | 57.158078  |
| 1379.364806 | 104.248754  | 36.043594  |
| 1380.189243 | 36.645776   | 12.677705  |
| 1380.635842 | 10.665504   | 3.690954   |
| 1384.628344 | 248.141949  | 86.121478  |
| 1385.327496 | 23.011830   | 7.990642   |
| 1385.675699 | 36.503471   | 12.678674  |
| 1386.018247 | 188.604991  | 65.523970  |
| 1388.122234 | 1.936237    | 0.673696   |
| 1389.275616 | 33.751664   | 11.753350  |
| 1390.220157 | 15.191200   | 5.293632   |
| 1390.605259 | 27.245035   | 9.496625   |
| 1392.714789 | 5.642507    | 1.969756   |
| 1393.598103 | 3.733199    | 1.304058   |
| 1401.416884 | 1.991402    | 0.699527   |
| 1402.240992 | 117.962947  | 41.461627  |
| 1402.661224 | 5.872353    | 2.064634   |
| 1404.172846 | 44.498987   | 15.662056  |
| 1407.384288 | 108.543288  | 38.290738  |
| 1409.393853 | 32.872566   | 11.612990  |

|             |             |             |
|-------------|-------------|-------------|
| 1409.552159 | 413.192966  | 145.986313  |
| 1410.490518 | 631.942780  | 223.422032  |
| 1411.186544 | 893.630418  | 316.097048  |
| 1413.104876 | 92.838808   | 32.883802   |
| 1414.461015 | 44.794370   | 15.881535   |
| 1419.920464 | 74.421172   | 26.487355   |
| 1420.451048 | 35.565686   | 12.662969   |
| 1423.894051 | 0.564791    | 0.201578    |
| 1428.435454 | 284.698222  | 101.935028  |
| 1429.609523 | 159.423682  | 57.127910   |
| 1430.325039 | 219.201103  | 78.587875   |
| 1431.066574 | 122.709355  | 44.016508   |
| 1431.274563 | 36.325102   | 13.031904   |
| 1432.200080 | 94.290974   | 33.849471   |
| 1432.902044 | 66.777985   | 23.984346   |
| 1433.552898 | 85.489817   | 30.718937   |
| 1433.702568 | 69.611971   | 25.016184   |
| 1434.133838 | 3.733074    | 1.341944    |
| 1435.388846 | 15.537605   | 5.590256    |
| 1435.641787 | 11.043573   | 3.974054    |
| 1437.918378 | 34.532438   | 12.446279   |
| 1438.887619 | 24.317708   | 8.770565    |
| 1700.882381 | 7.553156    | 3.220185    |
| 1701.315782 | 0.953286    | 0.406524    |
| 1704.361908 | 0.766999    | 0.327668    |
| 1704.645235 | 3.493264    | 1.492600    |
| 1710.948684 | 7.141489    | 3.062696    |
| 1711.469823 | 23.771624   | 10.197793   |
| 1717.082958 | 8.721790    | 3.753833    |
| 1717.674989 | 1.152747    | 0.496310    |
| 1724.579041 | 123.545889  | 53.405929   |
| 1726.890316 | 165.225278  | 71.518651   |
| 1733.849963 | 349.461982  | 151.876129  |
| 1735.886992 | 382.941828  | 166.621993  |
| 1740.034603 | 8752.382664 | 3817.352388 |
| 1745.488634 | 5.918092    | 2.589267    |
| 2861.484432 | 63.793935   | 45.756084   |
| 2864.032530 | 15.399050   | 11.054776   |
| 2864.142814 | 51.083624   | 36.673675   |
| 2865.313289 | 15.459083   | 11.102836   |
| 2868.427855 | 37.406005   | 26.894491   |
| 2869.048326 | 6.303101    | 4.532838    |
| 2870.623654 | 6.533779    | 4.701308    |
| 2875.005976 | 32.533043   | 23.444529   |
| 2875.811677 | 11.633742   | 8.386060    |
| 2877.469328 | 9.909741    | 7.147450    |
| 2878.626206 | 2.542800    | 1.834744    |
| 2880.615252 | 14.634279   | 10.566585   |
| 2882.154777 | 37.254490   | 26.913736   |
| 2883.558598 | 43.002909   | 31.081694   |
| 2884.623182 | 93.422057   | 67.548636   |
| 2884.875254 | 77.497495   | 56.039309   |
| 2886.489473 | 50.035098   | 36.201187   |
| 2887.024908 | 167.799132  | 121.427852  |
| 2890.420671 | 33.084019   | 23.969413   |
| 2892.329790 | 171.434015  | 124.286191  |
| 2893.535865 | 123.860787  | 89.834007   |
| 2897.599052 | 274.322714  | 199.240732  |
| 2898.314159 | 157.785158  | 114.627726  |
| 2903.999151 | 151.665964  | 110.398376  |
| 2920.775615 | 97.663625   | 71.500504   |
| 2926.220601 | 29.458082   | 21.606758   |
| 2926.761181 | 166.203263  | 121.928408  |
| 2927.236224 | 60.824392   | 44.628636   |
| 3034.406411 | 12.806635   | 9.740625    |
| 3034.465062 | 6.934018    | 5.274062    |
| 3035.543071 | 11.742245   | 8.934404    |
| 3035.877228 | 3.070945    | 2.336869    |
| 3036.753449 | 12.210079   | 9.294073    |
| 3037.313265 | 7.618750    | 5.800312    |
| 3037.881580 | 15.460468   | 11.772577   |
| 3038.659111 | 13.603522   | 10.361233   |
| 3041.038722 | 8.554402    | 6.520632    |
| 3041.277425 | 10.974680   | 8.366156    |
| 3043.235000 | 8.768734    | 6.688834    |
| 3043.441229 | 7.717377    | 5.887253    |
| 3044.095687 | 8.892284    | 6.784998    |
| 3044.406108 | 8.883285    | 6.778823    |

Statistical Thermal Analysis \*\*\* ideal gas assumed \*\*\*

Pressure: 1.000000 atm.  
Temperature: 298.150000 K

Moments of Inertia (and direction vectors)  
=====

|            |            |             |
|------------|------------|-------------|
| 71272.7527 | 74194.2649 | 115510.1859 |
| -----      |            |             |
| 0.9388     | 0.2117     | 0.2718      |
| -0.0751    | 0.8958     | -0.4382     |
| -0.3362    | 0.3909     | 0.8568      |

The rotational contribution to the molecular entropy includes a term, dependent on the symmetry number sigma. The results reported below were computed using sigma = 1, determined from the point group symmetry of the input geometry (NOSYM). If this is not the correct symmetry, please contact SCM to report a bug.

| Temp   |                                             | Transl | Rotat  | Vibrat  | Total   |
|--------|---------------------------------------------|--------|--------|---------|---------|
| ----   |                                             | -----  | -----  | -----   | -----   |
| 298.15 | Entropy (cal/mole-K):                       | 47.030 | 41.631 | 224.865 | 313.526 |
|        | Internal Energy (Kcal/mole):                | 0.889  | 0.889  | 619.205 | 620.983 |
|        | Constant Volume Heat Capacity (cal/mole-K): | 2.981  | 2.981  | 241.295 | 247.257 |

\*\*\*\*\*

\*\*\* DONE CALCULATING ANALYTICAL SECOND DERIVATIVES OF THE ENERGY \*\*\*

## host-guest complex gas phase

G E O M E T R Y   U P D A T E   \*\*\* 23 \*\*\*

\*\*\* Using NEW gradient routines \*\*\*

Energy gradients wrt nuclear displacements

=====

| Atom | Cartesian (a.u./angstrom) |           |           |
|------|---------------------------|-----------|-----------|
|      | X                         | Y         | Z         |
| 1 H  | -0.000053                 | -0.000041 | 0.000052  |
| 2 C  | 0.000009                  | -0.000001 | 0.000048  |
| 3 C  | 0.000030                  | 0.000005  | -0.000091 |
| 4 H  | -0.000004                 | 0.000043  | -0.000048 |
| 5 H  | 0.000050                  | 0.000077  | 0.000010  |
| 6 C  | -0.000015                 | 0.000025  | 0.000013  |
| 7 C  | -0.000115                 | -0.000025 | -0.000080 |
| 8 H  | 0.000011                  | -0.000003 | 0.000016  |
| 9 H  | 0.000005                  | 0.000015  | -0.000023 |
| 10 C | 0.000004                  | 0.000003  | -0.000072 |
| 11 C | -0.000049                 | -0.000066 | 0.000056  |
| 12 H | 0.000062                  | -0.000020 | 0.000014  |
| 13 H | 0.000027                  | -0.000014 | -0.000046 |
| 14 C | 0.000003                  | -0.000012 | -0.000005 |
| 15 C | -0.000048                 | 0.000001  | 0.000108  |
| 16 H | -0.000036                 | -0.000010 | -0.000028 |
| 17 H | -0.000032                 | -0.000023 | -0.000012 |
| 18 C | -0.000101                 | 0.000023  | -0.000202 |
| 19 C | 0.000049                  | 0.000000  | 0.000105  |
| 20 H | -0.000029                 | 0.000034  | -0.000029 |
| 21 H | -0.000048                 | 0.000005  | -0.000035 |
| 22 C | -0.000054                 | -0.000007 | 0.000051  |
| 23 C | -0.000082                 | -0.000041 | 0.000004  |
| 24 H | -0.000002                 | -0.000011 | -0.000005 |
| 25 H | -0.000003                 | -0.000005 | 0.000002  |
| 26 C | -0.000015                 | -0.000071 | 0.000037  |
| 27 C | 0.000027                  | -0.000087 | -0.000083 |
| 28 H | -0.000019                 | -0.000016 | 0.000061  |
| 29 H | -0.000031                 | -0.000008 | 0.000032  |
| 30 O | 0.000027                  | -0.000090 | 0.000012  |
| 31 O | -0.000009                 | -0.000040 | -0.000044 |
| 32 O | -0.000057                 | 0.000032  | 0.000108  |
| 33 O | -0.000042                 | -0.000056 | 0.000073  |
| 34 O | -0.000079                 | -0.000037 | 0.000074  |
| 35 O | -0.000022                 | 0.000098  | -0.000010 |
| 36 O | 0.000209                  | -0.000060 | 0.000105  |
| 37 O | 0.000028                  | 0.000080  | -0.000011 |
| 38 O | 0.000031                  | 0.000145  | 0.000010  |
| 39 O | 0.000029                  | 0.000036  | -0.000070 |
| 40 O | 0.000010                  | -0.000014 | -0.000017 |
| 41 O | 0.000047                  | 0.000021  | 0.000099  |
| 42 O | -0.000005                 | 0.000013  | -0.000006 |
| 43 O | -0.000008                 | 0.000016  | -0.000020 |
| 44 N | 0.000037                  | -0.000019 | 0.000040  |
| 45 N | -0.000085                 | 0.000022  | -0.000145 |
| 46 N | 0.000069                  | -0.000181 | -0.000025 |
| 47 N | 0.000123                  | -0.000063 | 0.000071  |
| 48 N | 0.000089                  | 0.000064  | -0.000105 |
| 49 N | 0.000004                  | 0.000027  | 0.000238  |
| 50 N | -0.000053                 | -0.000031 | 0.000079  |
| 51 N | -0.000021                 | -0.000161 | 0.000159  |
| 52 N | -0.000152                 | -0.000176 | 0.000036  |
| 53 N | -0.000031                 | -0.000130 | -0.000006 |
| 54 N | 0.000025                  | 0.000076  | 0.000360  |
| 55 N | -0.000086                 | 0.000026  | -0.000158 |
| 56 N | -0.000057                 | 0.000047  | 0.000092  |
| 57 N | -0.000046                 | 0.000125  | -0.000008 |
| 58 N | 0.000043                  | 0.000017  | 0.000046  |
| 59 N | -0.000010                 | 0.000072  | 0.000007  |
| 60 N | 0.000026                  | 0.000171  | 0.000080  |
| 61 N | 0.000090                  | -0.000113 | 0.000027  |
| 62 N | 0.000124                  | -0.000063 | 0.000172  |
| 63 N | 0.000064                  | 0.000064  | 0.000008  |
| 64 N | 0.000048                  | -0.000041 | 0.000012  |
| 65 N | -0.000090                 | 0.000010  | -0.000035 |
| 66 N | 0.000087                  | 0.000017  | -0.000006 |
| 67 N | -0.000090                 | 0.000031  | 0.000085  |
| 68 N | 0.000083                  | -0.000043 | -0.000287 |
| 69 N | 0.000015                  | 0.000123  | 0.000097  |

|        |           |           |           |
|--------|-----------|-----------|-----------|
| 70 N   | 0.000128  | 0.000035  | -0.000086 |
| 71 N   | -0.000070 | 0.000130  | 0.000043  |
| 72 C   | -0.000002 | -0.000047 | 0.000043  |
| 73 C   | -0.000068 | -0.000071 | 0.000051  |
| 74 H   | -0.000042 | -0.000101 | -0.000038 |
| 75 H   | -0.000084 | -0.000048 | -0.000076 |
| 76 C   | -0.000078 | -0.000035 | -0.000016 |
| 77 C   | -0.000147 | -0.000077 | 0.000032  |
| 78 H   | -0.000025 | 0.000012  | -0.000002 |
| 79 H   | 0.000010  | 0.000003  | 0.000003  |
| 80 C   | -0.000017 | 0.000006  | -0.000118 |
| 81 C   | -0.000021 | -0.000034 | -0.000155 |
| 82 H   | -0.000013 | -0.000023 | 0.000028  |
| 83 H   | -0.000033 | -0.000021 | 0.000046  |
| 84 C   | 0.000008  | 0.000160  | -0.000139 |
| 85 C   | 0.000014  | -0.000021 | -0.000104 |
| 86 H   | -0.000076 | -0.000056 | 0.000034  |
| 87 H   | -0.000064 | -0.000023 | 0.000027  |
| 88 C   | 0.000017  | 0.000131  | -0.000041 |
| 89 C   | -0.000176 | 0.000067  | -0.000084 |
| 90 H   | 0.000020  | 0.000054  | -0.000018 |
| 91 H   | 0.000001  | 0.000005  | 0.000060  |
| 92 C   | 0.000163  | -0.000032 | 0.000000  |
| 93 C   | -0.000039 | -0.000048 | 0.000027  |
| 94 H   | -0.000002 | -0.000011 | 0.000016  |
| 95 H   | 0.000005  | 0.000008  | -0.000009 |
| 96 C   | -0.000050 | 0.000049  | -0.000157 |
| 97 C   | 0.000103  | -0.000087 | -0.000015 |
| 98 H   | 0.000079  | -0.000008 | 0.000003  |
| 99 H   | 0.000016  | -0.000011 | 0.000050  |
| 100 C  | -0.000058 | 0.000014  | -0.000051 |
| 101 H  | 0.000024  | 0.000002  | 0.000023  |
| 102 C  | 0.000081  | -0.000057 | 0.000118  |
| 103 H  | -0.000022 | 0.000005  | -0.000046 |
| 104 C  | 0.000028  | -0.000018 | 0.000009  |
| 105 H  | -0.000069 | -0.000065 | -0.000116 |
| 106 C  | -0.000062 | 0.000058  | -0.000203 |
| 107 H  | 0.000009  | 0.000006  | 0.000005  |
| 108 C  | -0.000113 | 0.000097  | 0.000053  |
| 109 H  | 0.000009  | -0.000045 | -0.000024 |
| 110 C  | 0.000040  | -0.000051 | -0.000257 |
| 111 H  | -0.000035 | -0.000018 | 0.000050  |
| 112 C  | -0.000091 | 0.000027  | -0.000048 |
| 113 H  | 0.000016  | 0.000000  | 0.000020  |
| 114 C  | 0.000095  | -0.000001 | 0.000040  |
| 115 H  | -0.000078 | -0.000018 | 0.000009  |
| 116 C  | -0.000099 | 0.000148  | -0.000057 |
| 117 H  | -0.000016 | -0.000047 | 0.000010  |
| 118 C  | 0.000051  | 0.000052  | -0.000138 |
| 119 H  | -0.000014 | -0.000010 | 0.000014  |
| 120 C  | -0.000095 | 0.000125  | 0.000247  |
| 121 H  | -0.000036 | -0.000007 | -0.000050 |
| 122 C  | 0.000020  | -0.000074 | -0.000086 |
| 123 H  | -0.000039 | 0.000025  | 0.000038  |
| 124 C  | -0.000033 | -0.000021 | 0.000158  |
| 125 H  | 0.000043  | -0.000028 | -0.000019 |
| 126 C  | 0.000198  | -0.000091 | 0.000016  |
| 127 H  | 0.000024  | -0.000108 | 0.000253  |
| 128 H  | 0.000014  | 0.000034  | 0.000032  |
| 129 H  | -0.000036 | -0.000041 | -0.000125 |
| 130 Ir | 0.000050  | -0.000510 | 0.000318  |
| 131 H  | 0.000080  | 0.000066  | -0.000067 |
| 132 C  | 0.000226  | -0.000066 | 0.000093  |
| 133 C  | -0.000031 | 0.000260  | -0.000245 |
| 134 C  | 0.000065  | -0.000247 | -0.000031 |
| 135 C  | -0.000252 | 0.000292  | 0.000127  |
| 136 C  | 0.000002  | 0.000133  | -0.000026 |
| 137 H  | 0.000045  | -0.000012 | 0.000021  |
| 138 H  | 0.000017  | 0.000031  | -0.000016 |
| 139 H  | 0.000046  | 0.000024  | -0.000122 |
| 140 H  | -0.000001 | -0.000031 | -0.000052 |
| 141 O  | 0.000006  | -0.000268 | 0.000205  |
| 142 H  | 0.000008  | 0.000075  | -0.000055 |
| 143 O  | 0.000216  | 0.000480  | -0.000384 |
| 144 H  | 0.000005  | -0.000075 | 0.000026  |
| 145 O  | -0.000173 | 0.000240  | -0.000013 |
| 146 H  | 0.000050  | 0.000071  | -0.000021 |
| 147 C  | 0.000000  | 0.000075  | -0.000128 |
| 148 H  | 0.000020  | 0.000022  | -0.000094 |
| 149 H  | -0.000002 | -0.000019 | -0.000046 |
| 150 C  | 0.000035  | 0.000069  | -0.000054 |
| 151 H  | -0.000004 | -0.000023 | -0.000039 |
| 152 H  | -0.000015 | 0.000009  | -0.000044 |
| 153 C  | 0.000073  | -0.000244 | 0.000247  |
| 154 H  | 0.000042  | 0.000022  | 0.000054  |

```

155 H    0.000190 -0.000122  0.000014
156 C   -0.000025  0.000015  0.000031
157 H    0.000027  0.000004  0.000076
158 H    0.000000  0.000011  0.000061
159 C   -0.000008  0.000063 -0.000041
160 H    0.000054  0.000057 -0.000022
161 H    0.000031  0.000010 -0.000040
    
```

-----  
 Geometry Convergence Tests

```

Energy old :      -36.42874206
Energy new :      -36.42875614
    
```

Convergence tests:  
 (Energies in hartree, Gradients in hartree/angstr or radian, Lengths in angstrom, Angles in degrees)

| Item             | Value       | Criterion  | Conv. | Ratio      |
|------------------|-------------|------------|-------|------------|
| change in energy | -0.00001407 | 0.00100000 | YES   | 0.35852525 |
| gradient max     | 0.00051035  | 0.00100000 | YES   | 0.18089671 |
| gradient rms     | 0.00008991  | 0.00066667 | YES   | 0.22243903 |
| cart. step max   | 0.00498935  | 0.01000000 | YES   | 0.90041204 |
| cart. step rms   | 0.00080693  | 0.00666667 | YES   | 0.93023529 |

```

prediction dE :      -0.00001145
    
```

\*\*\*\*\*  
 Geometry CONVERGED  
 \*\*\*\*\*

|                                                                 | hartree              | eV          | kcal/mol   | kJ/mol      |
|-----------------------------------------------------------------|----------------------|-------------|------------|-------------|
| Pauli Repulsion                                                 |                      |             |            |             |
| Kinetic (Delta T^0):                                            | 467.685345681582021  | 12726.3658  | 293477.02  | 1227907.70  |
| Delta V^Pauli Coulomb:                                          | -243.722090862730710 | -6632.0155  | -152937.94 | -639892.26  |
| Delta V^Pauli LDA-XC:                                           | -57.264001648711677  | -1558.2328  | -35933.71  | -150346.62  |
| Delta V^Pauli GGA-Exchange:                                     | 3.599372473983408    | 97.9439     | 2258.64    | 9450.15     |
| Delta V^Pauli GGA-Correlation:                                  | -4.160827277065724   | -113.2219   | -2610.96   | -10924.25   |
| Total Pauli Repulsion:                                          | 166.137798367057314  | 4520.8395   | 104253.05  | 436194.73   |
| (Total Pauli Repulsion =<br>Delta E^Pauli in BB paper)          |                      |             |            |             |
| Steric Interaction                                              |                      |             |            |             |
| Pauli Repulsion (Delta E^Pauli):                                | 166.137798367057314  | 4520.8395   | 104253.05  | 436194.73   |
| Electrostatic Interaction:                                      | -36.319889135431310  | -988.3145   | -22791.08  | -95357.86   |
| (Electrostatic Interaction =<br>Delta V_elstat in the BB paper) |                      |             |            |             |
| Total Steric Interaction:                                       | 129.817909231626004  | 3532.5250   | 81461.98   | 340836.87   |
| (Total Steric Interaction =<br>Delta E^0 in the BB paper)       |                      |             |            |             |
| Orbital Interactions                                            |                      |             |            |             |
| A:                                                              | -165.762432459095777 | -4510.6253  | -104017.51 | -435209.20  |
| Total Orbital Interactions:                                     | -165.807209896583828 | -4511.8437  | -104045.61 | -435326.77  |
| Alternative Decomposition Orb.Int.                              |                      |             |            |             |
| Kinetic:                                                        | -430.396951241144905 | -11711.6969 | -270078.19 | -1130007.04 |
| Coulomb:                                                        | 241.599758025071111  | 6574.2639   | 151606.15  | 634320.07   |
| XC:                                                             | 22.989983319490047   | 625.5893    | 14426.43   | 60360.19    |
| Total Orbital Interactions:                                     | -165.807209896583743 | -4511.8437  | -104045.61 | -435326.77  |
| Residu (E=Steric+OrbInt+Res):                                   | 0.000000747198398    | 0.0000      | 0.00       | 0.00        |
| Dispersion Energy:                                              | -0.439463574571615   | -11.9584    | -275.77    | -1153.81    |
| Total Bonding Energy:                                           | -36.428763492331043  | -991.2771   | -22859.40  | -95643.71   |

Summary of Bonding Energy (energy terms are taken from the energy decomposition above)

|                                 |                     |           |           |           |
|---------------------------------|---------------------|-----------|-----------|-----------|
| Electrostatic Energy:           | -36.319889135431310 | -988.3145 | -22791.08 | -95357.86 |
| Kinetic Energy:                 | 37.288394440437116  | 1014.6688 | 23398.82  | 97900.67  |
| Coulomb (Steric+OrbInt) Energy: | -2.122332090461214  | -57.7516  | -1331.78  | -5572.18  |

|                       |                     |           |           |           |
|-----------------------|---------------------|-----------|-----------|-----------|
| XC Energy:            | -34.835473132303946 | -947.9215 | -21859.59 | -91460.52 |
| Dispersion Energy:    | -0.439463574571615  | -11.9584  | -275.77   | -1153.81  |
| Total Bonding Energy: | -36.428763492330972 | -991.2771 | -22859.40 | -95643.71 |

List of All Frequencies:

Intensities  
 =====

| Frequency<br>cm-1 | Dipole Strength<br>1e-40 esu <sup>2</sup> cm <sup>2</sup> | Absorption Intensity (degeneracy not counted)<br>km/mole |
|-------------------|-----------------------------------------------------------|----------------------------------------------------------|
| 36.977504         | 3.077742                                                  | 0.028526                                                 |
| 38.789649         | 10.134845                                                 | 0.098540                                                 |
| 47.933899         | 6.248688                                                  | 0.075077                                                 |
| 50.285717         | 32.042415                                                 | 0.403876                                                 |
| 51.393310         | 11.687401                                                 | 0.150558                                                 |
| 54.129749         | 31.907605                                                 | 0.432921                                                 |
| 62.507114         | 75.742862                                                 | 1.186723                                                 |
| 65.439139         | 21.545732                                                 | 0.353408                                                 |
| 66.780348         | 10.960914                                                 | 0.183474                                                 |
| 72.178327         | 46.779534                                                 | 0.846332                                                 |
| 74.362537         | 41.073637                                                 | 0.765589                                                 |
| 79.301507         | 8.102036                                                  | 0.161047                                                 |
| 82.137925         | 91.050707                                                 | 1.874585                                                 |
| 82.538031         | 107.160899                                                | 2.217014                                                 |
| 86.481757         | 179.726051                                                | 3.895952                                                 |
| 86.698132         | 28.720065                                                 | 0.624127                                                 |
| 90.060556         | 4.434212                                                  | 0.100099                                                 |
| 91.595757         | 19.915168                                                 | 0.457233                                                 |
| 94.765495         | 3.749514                                                  | 0.089064                                                 |
| 97.868975         | 61.593402                                                 | 1.510975                                                 |
| 101.279133        | 186.691194                                                | 4.739384                                                 |
| 111.597155        | 311.091770                                                | 8.702013                                                 |
| 118.298185        | 252.587430                                                | 7.489760                                                 |
| 119.446452        | 427.574066                                                | 12.801554                                                |
| 121.165854        | 71.575664                                                 | 2.173821                                                 |
| 125.139634        | 112.656225                                                | 3.533688                                                 |
| 129.970189        | 14.979408                                                 | 0.487996                                                 |
| 132.289908        | 22.240714                                                 | 0.737486                                                 |
| 133.597511        | 38.988936                                                 | 1.305623                                                 |
| 137.153195        | 58.805984                                                 | 2.021648                                                 |
| 141.891720        | 7.003351                                                  | 0.249081                                                 |
| 145.229873        | 57.192392                                                 | 2.081960                                                 |
| 148.386460        | 6.494473                                                  | 0.241555                                                 |
| 149.792333        | 50.473992                                                 | 1.895114                                                 |
| 153.406407        | 21.158753                                                 | 0.813601                                                 |
| 155.885966        | 13.263063                                                 | 0.518238                                                 |
| 161.980533        | 57.842056                                                 | 2.348468                                                 |
| 163.515310        | 15.382267                                                 | 0.630459                                                 |
| 164.218197        | 45.426049                                                 | 1.869839                                                 |
| 167.533688        | 151.863998                                                | 6.377274                                                 |
| 172.323456        | 138.999320                                                | 6.003923                                                 |
| 174.105909        | 88.479151                                                 | 3.861291                                                 |
| 176.363446        | 51.764939                                                 | 2.288349                                                 |
| 181.981093        | 49.287451                                                 | 2.248230                                                 |
| 184.061030        | 106.633306                                                | 4.919634                                                 |
| 185.377782        | 8.409754                                                  | 0.390768                                                 |
| 187.445718        | 33.964065                                                 | 1.595781                                                 |
| 189.123461        | 14.372944                                                 | 0.681348                                                 |
| 192.743605        | 41.085235                                                 | 1.984924                                                 |
| 195.987818        | 8.077095                                                  | 0.396791                                                 |
| 196.822343        | 47.456956                                                 | 2.341275                                                 |
| 197.620661        | 88.802572                                                 | 4.398818                                                 |
| 204.642585        | 9.964259                                                  | 0.511116                                                 |
| 204.901408        | 53.979126                                                 | 2.772355                                                 |
| 208.432421        | 6.609219                                                  | 0.345298                                                 |
| 210.413287        | 12.465531                                                 | 0.657449                                                 |
| 211.062966        | 5.120504                                                  | 0.270896                                                 |
| 220.820368        | 97.328814                                                 | 5.387145                                                 |
| 224.008950        | 3.645700                                                  | 0.204703                                                 |
| 229.296415        | 19.773476                                                 | 1.136471                                                 |
| 229.573435        | 28.153982                                                 | 1.620091                                                 |
| 231.345540        | 26.360594                                                 | 1.528602                                                 |
| 233.432660        | 83.498192                                                 | 4.885587                                                 |
| 236.625953        | 139.550641                                                | 8.276987                                                 |
| 239.448465        | 5.117265                                                  | 0.307134                                                 |
| 241.303818        | 41.870231                                                 | 2.532489                                                 |
| 249.707042        | 72.416194                                                 | 4.532570                                                 |
| 256.280583        | 53.297683                                                 | 3.423750                                                 |
| 261.940329        | 1.902646                                                  | 0.124922                                                 |



|            |            |            |
|------------|------------|------------|
| 264.806044 | 2.146019   | 0.142443   |
| 265.360462 | 1.028968   | 0.068441   |
| 268.127236 | 10.980020  | 0.737942   |
| 278.472329 | 0.276396   | 0.019293   |
| 278.545029 | 0.312848   | 0.021843   |
| 279.086063 | 0.970042   | 0.067859   |
| 280.789664 | 12.824808  | 0.902631   |
| 287.238747 | 2.166377   | 0.155975   |
| 287.441035 | 1.911137   | 0.137695   |
| 292.948016 | 11.679190  | 0.857593   |
| 324.264188 | 2.878417   | 0.233954   |
| 324.921609 | 2.364599   | 0.192581   |
| 327.899634 | 1.054856   | 0.086699   |
| 328.017861 | 7.288436   | 0.599253   |
| 329.815716 | 7.410164   | 0.612600   |
| 332.664385 | 33.402859  | 2.785275   |
| 335.446926 | 27.778229  | 2.335643   |
| 337.901858 | 0.316461   | 0.026803   |
| 343.828391 | 10.981010  | 0.946372   |
| 346.630621 | 12.910114  | 1.121696   |
| 347.078732 | 130.723366 | 11.372588  |
| 351.971451 | 188.858697 | 16.661822  |
| 354.282459 | 146.992709 | 13.053396  |
| 355.237259 | 24.956720  | 2.222205   |
| 355.705488 | 91.242893  | 8.135190   |
| 357.580658 | 43.900953  | 3.934831   |
| 358.729607 | 43.557766  | 3.916615   |
| 358.831100 | 39.292091  | 3.534055   |
| 360.706899 | 246.405296 | 22.278326  |
| 361.038302 | 85.619676  | 7.748273   |
| 364.153860 | 322.345339 | 29.422826  |
| 366.186442 | 278.360462 | 25.549822  |
| 367.877444 | 35.881972  | 3.308701   |
| 372.145243 | 29.539962  | 2.755500   |
| 375.254649 | 49.041155  | 4.612802   |
| 388.320382 | 134.663338 | 13.107433  |
| 392.335788 | 2.555064   | 0.251268   |
| 399.790261 | 4.523512   | 0.453300   |
| 400.299342 | 1.229231   | 0.123338   |
| 406.575526 | 1.163432   | 0.118566   |
| 412.051353 | 167.688684 | 17.319413  |
| 420.846504 | 33.192926  | 3.501445   |
| 424.799208 | 3.219641   | 0.342822   |
| 427.533744 | 39.106015  | 4.190753   |
| 428.325879 | 75.716750  | 8.129135   |
| 430.468428 | 64.172196  | 6.924147   |
| 433.999898 | 108.017134 | 11.750608  |
| 436.819249 | 151.476643 | 16.585383  |
| 439.541961 | 5.887171   | 0.648612   |
| 440.353819 | 7.093209   | 0.782929   |
| 444.406558 | 13.964495  | 1.555549   |
| 446.131234 | 6.545306   | 0.731932   |
| 462.259033 | 232.391420 | 26.926727  |
| 482.819638 | 200.078607 | 24.213839  |
| 486.751785 | 1.482567   | 0.180884   |
| 487.950116 | 8.799072   | 1.076193   |
| 549.768652 | 4.177953   | 0.575734   |
| 550.266978 | 2.204954   | 0.304124   |
| 562.843382 | 3.015732   | 0.425460   |
| 569.407749 | 4.969331   | 0.709250   |
| 574.241270 | 6.027545   | 0.867587   |
| 585.432535 | 1.811789   | 0.265866   |
| 587.672438 | 4.539818   | 0.668732   |
| 588.839393 | 1.167459   | 0.172312   |
| 590.604839 | 1.526311   | 0.225953   |
| 597.858376 | 9.276513   | 1.390148   |
| 598.779332 | 19.021434  | 2.854882   |
| 600.059161 | 3.258857   | 0.490160   |
| 601.354201 | 8.558055   | 1.289981   |
| 605.512059 | 220.547272 | 33.473610  |
| 606.071341 | 166.109876 | 25.234649  |
| 608.184884 | 3.558476   | 0.542472   |
| 611.335462 | 27.811926  | 4.261757   |
| 616.187538 | 8.024658   | 1.239417   |
| 618.085654 | 4.782042   | 0.740867   |
| 624.030962 | 61.157612  | 9.566096   |
| 629.169548 | 72.257441  | 11.395368  |
| 633.216674 | 154.682946 | 24.551207  |
| 638.428724 | 0.467800   | 0.074860   |
| 644.223393 | 22.986306  | 3.711793   |
| 646.024635 | 3.792591   | 0.614134   |
| 648.947571 | 5.490936   | 0.893170   |
| 651.831378 | 747.679662 | 122.159965 |
| 652.750178 | 134.202109 | 21.957577  |
| 655.064660 | 202.064692 | 33.178189  |

|            |             |            |
|------------|-------------|------------|
| 662.182037 | 1.283850    | 0.213093   |
| 663.615573 | 446.155749  | 74.213196  |
| 667.510916 | 350.326864  | 58.615150  |
| 672.528515 | 6.459930    | 1.088972   |
| 673.130384 | 8.183406    | 1.380738   |
| 680.827231 | 7.500427    | 1.279974   |
| 681.531255 | 43.057398   | 7.355490   |
| 699.707970 | 19.069103   | 3.344453   |
| 700.398412 | 2.552758    | 0.448160   |
| 701.614349 | 5.700270    | 1.002471   |
| 703.072057 | 5.256900    | 0.926419   |
| 704.423573 | 15.964606   | 2.818838   |
| 706.745094 | 45.415218   | 8.045301   |
| 707.428157 | 35.970174   | 6.378271   |
| 710.622125 | 292.599953  | 52.118397  |
| 713.186266 | 0.977214    | 0.174691   |
| 713.994019 | 0.203617    | 0.036441   |
| 714.965351 | 0.551311    | 0.098801   |
| 716.478325 | 6.094333    | 1.094479   |
| 716.879099 | 5.101926    | 0.916765   |
| 718.257760 | 30.834264   | 5.551265   |
| 739.632590 | 9.856758    | 1.827377   |
| 741.369272 | 5.619580    | 1.044279   |
| 749.568347 | 21.109288   | 3.966093   |
| 749.816690 | 35.249811   | 6.625062   |
| 751.914034 | 2.081501    | 0.392304   |
| 752.908355 | 30.924634   | 5.836127   |
| 753.815683 | 100.343765  | 18.959795  |
| 761.523887 | 4580.630855 | 874.353182 |
| 762.150706 | 4661.105887 | 890.446632 |
| 764.654404 | 352.637841  | 67.588402  |
| 764.951136 | 60.509627   | 11.602090  |
| 778.646248 | 677.345734  | 132.199151 |
| 779.796677 | 1420.465073 | 277.645098 |
| 785.912150 | 31.338654   | 6.173514   |
| 788.466023 | 23.505013   | 4.645383   |
| 788.805139 | 17.225175   | 3.405740   |
| 789.082053 | 9.467306    | 1.872521   |
| 790.303688 | 39.124970   | 7.750435   |
| 790.815345 | 30.341182   | 6.014308   |
| 790.913068 | 2.606157    | 0.516663   |
| 791.747371 | 26.722672   | 5.303280   |
| 812.186103 | 40.728538   | 8.291487   |
| 835.904418 | 91.026249   | 19.072224  |
| 840.493099 | 14.914732   | 3.142156   |
| 847.153162 | 9.599490    | 2.038394   |
| 851.984719 | 101.753640  | 21.730005  |
| 856.179851 | 31.580908   | 6.777471   |
| 862.563386 | 13.310070   | 2.877726   |
| 866.481689 | 264.907501  | 57.534947  |
| 867.814850 | 75.478933   | 16.418403  |
| 869.954358 | 1064.700923 | 232.167898 |
| 872.971091 | 41.007060   | 8.972977   |
| 881.026066 | 0.134598    | 0.029724   |
| 881.951517 | 0.288372    | 0.063749   |
| 896.340035 | 1.416327    | 0.318211   |
| 897.175666 | 1.572873    | 0.353712   |
| 913.607224 | 38.108980   | 8.726999   |
| 916.220359 | 0.713856    | 0.163941   |
| 919.985070 | 3.720501    | 0.857947   |
| 920.572968 | 89.273550   | 20.599615  |
| 921.059937 | 2.923938    | 0.675047   |
| 921.554347 | 2.932991    | 0.677501   |
| 923.737111 | 1811.806997 | 419.506210 |
| 924.674536 | 26.910317   | 6.237144   |
| 925.949359 | 229.369695  | 53.235501  |
| 927.984076 | 37.601717   | 8.746338   |
| 928.147102 | 152.134527  | 35.393432  |
| 934.042822 | 230.504277  | 53.966449  |
| 938.339180 | 77.399845   | 18.204469  |
| 938.870177 | 164.617009  | 38.739885  |
| 939.281386 | 51.979171   | 12.237794  |
| 940.803046 | 81.753055   | 19.278835  |
| 943.545303 | 27.365828   | 6.472163   |
| 946.722731 | 9.256123    | 2.196494   |
| 951.329760 | 13.802554   | 3.291309   |
| 955.594656 | 2.036776    | 0.487860   |
| 957.752917 | 18.801987   | 4.513727   |
| 970.685451 | 1.955954    | 0.475900   |
| 978.843480 | 3.739910    | 0.917598   |
| 983.316236 | 26.632935   | 6.564329   |
| 990.252375 | 13.099446   | 3.251448   |
| 991.705192 | 1.524667    | 0.378997   |
| 996.741968 | 6.658779    | 1.663625   |
| 997.373732 | 11.240109   | 2.810001   |

|             |             |            |
|-------------|-------------|------------|
| 1012.114443 | 1.027072    | 0.260561   |
| 1018.555029 | 0.853584    | 0.217926   |
| 1044.532057 | 12.072712   | 3.160856   |
| 1047.127900 | 119.666866  | 31.408827  |
| 1047.941878 | 107.219960  | 28.163778  |
| 1049.890078 | 4.719696    | 1.242041   |
| 1052.774449 | 10.454187   | 2.758695   |
| 1053.194063 | 249.518607  | 65.870265  |
| 1055.500910 | 102.839475  | 27.207995  |
| 1059.558606 | 43.622041   | 11.585347  |
| 1060.088606 | 3.625868    | 0.963457   |
| 1060.539493 | 4.912311    | 1.305842   |
| 1062.253104 | 12.894727   | 3.433351   |
| 1065.574549 | 14.443252   | 3.857686   |
| 1066.246257 | 3.345882    | 0.894224   |
| 1067.972888 | 16.331751   | 4.371908   |
| 1070.397874 | 7.362209    | 1.975293   |
| 1072.405322 | 5.759559    | 1.548197   |
| 1085.573369 | 101.348167  | 27.577389  |
| 1087.990361 | 39.070460   | 10.654955  |
| 1089.944358 | 79.227622   | 21.645071  |
| 1103.859962 | 735.511166  | 203.507923 |
| 1108.824608 | 2036.485556 | 566.007596 |
| 1110.829776 | 2262.739035 | 630.028291 |
| 1122.297432 | 6.420003    | 1.806015   |
| 1124.458172 | 78.137123   | 22.023117  |
| 1132.196437 | 514.679115  | 146.061716 |
| 1134.727950 | 514.797873  | 146.422078 |
| 1135.502133 | 788.355925  | 224.382179 |
| 1137.368998 | 91.496170   | 26.084491  |
| 1138.739127 | 318.965181  | 91.042797  |
| 1141.118497 | 102.896232  | 29.431221  |
| 1145.212344 | 116.357668  | 33.400972  |
| 1150.241093 | 6.889176    | 1.986252   |
| 1152.135234 | 0.625685    | 0.180691   |
| 1156.115142 | 7.603644    | 2.203438   |
| 1162.015261 | 82.809371   | 24.119560  |
| 1165.359403 | 10.166012   | 2.969536   |
| 1170.106369 | 22.125578   | 6.489303   |
| 1175.300056 | 66.910668   | 19.711614  |
| 1177.074887 | 55.413631   | 16.349285  |
| 1181.219318 | 567.143547  | 167.919683 |
| 1183.692179 | 1388.125445 | 411.856158 |
| 1184.312529 | 1293.978459 | 384.123998 |
| 1186.268943 | 2044.811012 | 608.015157 |
| 1191.055928 | 54.579285   | 16.294389  |
| 1191.419215 | 57.743230   | 17.244228  |
| 1193.555253 | 1003.069077 | 300.089943 |
| 1195.334235 | 849.125911  | 254.413130 |
| 1196.581317 | 1305.719588 | 391.624819 |
| 1199.433810 | 54.403348   | 16.356109  |
| 1200.800995 | 51.470676   | 15.492053  |
| 1211.740536 | 1399.026252 | 424.926260 |
| 1215.305934 | 389.290674  | 118.587165 |
| 1216.231233 | 65.666611   | 20.018836  |
| 1217.033603 | 319.094297  | 97.341869  |
| 1217.977711 | 398.409385  | 121.631755 |
| 1218.282652 | 57.838394   | 17.662101  |
| 1219.681625 | 35.555589   | 10.870072  |
| 1221.566722 | 71.648665   | 21.938320  |
| 1222.745579 | 82.451147   | 25.270328  |
| 1225.958271 | 20.663263   | 6.349692   |
| 1226.374373 | 24.125681   | 7.416188   |
| 1226.929618 | 23.492805   | 7.224912   |
| 1230.757924 | 16.010040   | 4.939047   |
| 1234.578846 | 6.487998    | 2.007741   |
| 1242.781304 | 4.479040    | 1.395268   |
| 1245.171001 | 6.877872    | 2.146650   |
| 1266.434928 | 0.082559    | 0.026208   |
| 1267.175285 | 0.648116    | 0.205858   |
| 1278.803438 | 1.041812    | 0.333942   |
| 1279.492228 | 6.344339    | 2.034708   |
| 1283.584410 | 1.706254    | 0.548967   |
| 1287.200614 | 1407.779028 | 454.212205 |
| 1287.903441 | 1496.053907 | 482.957168 |
| 1302.521150 | 1.512883    | 0.493933   |
| 1302.716434 | 9.217700    | 3.009889   |
| 1303.750411 | 7.626310    | 2.492224   |
| 1305.501988 | 3.594157    | 1.176123   |
| 1305.606432 | 0.122282    | 0.040018   |
| 1307.653757 | 2.899157    | 0.950260   |
| 1308.678738 | 1.767339    | 0.579737   |
| 1336.937165 | 56.320306   | 18.873571  |
| 1340.048089 | 1569.113389 | 527.051170 |
| 1340.719688 | 1654.577977 | 556.036494 |

|             |             |            |
|-------------|-------------|------------|
| 1355.503926 | 9.606977    | 3.264116   |
| 1355.840710 | 6.776651    | 2.303042   |
| 1364.562195 | 108.161675  | 36.995152  |
| 1364.987266 | 246.545681  | 84.353687  |
| 1367.319967 | 33.070080   | 11.334007  |
| 1369.297219 | 1.088572    | 0.373623   |
| 1371.624904 | 0.807863    | 0.277748   |
| 1372.918262 | 6.116558    | 2.104892   |
| 1374.070901 | 10.394426   | 3.580039   |
| 1377.659604 | 28.618236   | 9.882410   |
| 1380.491481 | 73.480512   | 25.426347  |
| 1381.784859 | 51.550058   | 17.854499  |
| 1382.173355 | 20.325668   | 7.041828   |
| 1383.016480 | 8.815934    | 3.056143   |
| 1383.677814 | 2.554295    | 0.885899   |
| 1384.344711 | 36.982704   | 12.832787  |
| 1385.496357 | 25.693574   | 8.922940   |
| 1386.046864 | 5.438424    | 1.889422   |
| 1387.203577 | 45.627060   | 15.865025  |
| 1387.545522 | 93.550753   | 32.536632  |
| 1388.681616 | 119.000422  | 41.421828  |
| 1390.850837 | 185.953094  | 64.827912  |
| 1393.665251 | 4.943262    | 1.726832   |
| 1394.430613 | 22.608210   | 7.902075   |
| 1396.555936 | 1.155084    | 0.404343   |
| 1397.286313 | 21.826436   | 7.644451   |
| 1398.427398 | 2.555602    | 0.895800   |
| 1398.491002 | 1.109248    | 0.388836   |
| 1402.498115 | 4.436170    | 1.559511   |
| 1404.514030 | 7.981806    | 2.809994   |
| 1405.717155 | 21.294281   | 7.503070   |
| 1406.023906 | 7.963194    | 2.806455   |
| 1407.922834 | 141.048513  | 49.776624  |
| 1409.778672 | 121.793150  | 43.037979  |
| 1410.801282 | 193.493312  | 68.424223  |
| 1411.689068 | 29.137514   | 10.310260  |
| 1412.550890 | 182.215244  | 64.515918  |
| 1414.685288 | 0.093615    | 0.033196   |
| 1415.603142 | 3.441474    | 1.221136   |
| 1417.596129 | 3.121771    | 1.109256   |
| 1419.772909 | 10.647280   | 3.789096   |
| 1423.204222 | 105.290613  | 37.560810  |
| 1423.993872 | 178.245524  | 63.621635  |
| 1426.137254 | 590.102717  | 210.943919 |
| 1427.073298 | 136.570583  | 48.851906  |
| 1427.861671 | 58.378566   | 20.893809  |
| 1428.180629 | 157.768224  | 56.478187  |
| 1428.799821 | 103.541259  | 37.081978  |
| 1429.243017 | 26.070639   | 9.339762   |
| 1429.861593 | 132.297493  | 47.415866  |
| 1430.275710 | 11.154369   | 3.998921   |
| 1430.410688 | 46.236844   | 16.577804  |
| 1431.989656 | 9.821025    | 3.525127   |
| 1433.388724 | 122.735579  | 44.097354  |
| 1434.721081 | 169.306676  | 60.886307  |
| 1434.923549 | 429.000681  | 154.299605 |
| 1436.463388 | 349.372256  | 125.794324 |
| 1438.248891 | 44.145085   | 15.914554  |
| 1439.095188 | 16.119506   | 5.814593   |
| 1440.578456 | 8.721995    | 3.149422   |
| 1446.947433 | 0.372780    | 0.135202   |
| 1448.679075 | 6.697402    | 2.431961   |
| 1452.733343 | 0.746956    | 0.271994   |
| 1468.129145 | 4.279023    | 1.574660   |
| 1469.945018 | 9.109059    | 3.356237   |
| 1484.793915 | 35.592526   | 13.246559  |
| 1487.768584 | 7.191193    | 2.681726   |
| 1489.165224 | 12.653146   | 4.723017   |
| 1497.962857 | 9.964986    | 3.741587   |
| 1506.827106 | 44.970084   | 16.984986  |
| 1515.337588 | 21.451486   | 8.147884   |
| 1519.916775 | 58.967789   | 22.465326  |
| 1529.021284 | 96.470624   | 36.973170  |
| 1617.163950 | 765.547050  | 310.315886 |
| 1631.126829 | 973.658087  | 398.081758 |
| 1644.268225 | 164.795284  | 67.919662  |
| 1646.317583 | 3.505164    | 1.446439   |
| 1665.137231 | 608.626133  | 254.026309 |
| 1670.601979 | 660.883034  | 276.742376 |
| 1688.462493 | 72.208809   | 30.560445  |
| 1693.218625 | 361.106982  | 153.259355 |
| 1699.486857 | 1307.968663 | 557.177050 |
| 1714.149944 | 77.851510   | 33.449830  |
| 1717.640627 | 13.529655   | 5.825016   |
| 1721.979877 | 1486.699607 | 641.696054 |

|             |             |             |
|-------------|-------------|-------------|
| 1726.378026 | 144.187809  | 62.393955   |
| 1727.265337 | 111.033286  | 48.071793   |
| 1741.277939 | 380.882537  | 166.240650  |
| 1742.758390 | 160.096712  | 69.935497   |
| 1752.432835 | 2620.814746 | 1151.213240 |
| 2922.822181 | 9.363419    | 6.859855    |
| 2932.438683 | 8.829630    | 6.490072    |
| 2934.410909 | 10.129987   | 7.450886    |
| 2935.213550 | 2.532974    | 1.863582    |
| 2935.916995 | 39.162742   | 28.820064   |
| 2936.359765 | 7.398887    | 5.445700    |
| 2939.600696 | 5.697165    | 4.197834    |
| 2940.648269 | 4.447637    | 3.278314    |
| 2940.994002 | 42.742349   | 31.508708   |
| 2942.711309 | 6.185967    | 4.562820    |
| 2943.053027 | 18.301246   | 13.500716   |
| 2943.217677 | 1.924172    | 1.419529    |
| 2944.708451 | 12.264371   | 9.052440    |
| 2945.761725 | 25.742233   | 19.007365   |
| 2946.043459 | 34.889300   | 25.763773   |
| 2946.368127 | 19.834958   | 14.648608   |
| 2947.227084 | 76.351882   | 56.404197   |
| 2947.369554 | 67.178083   | 49.629542   |
| 2948.937554 | 126.572247  | 93.558260   |
| 2949.000021 | 11.816155   | 8.734318    |
| 2950.437656 | 58.159542   | 43.011590   |
| 2951.502371 | 101.941009  | 75.417153   |
| 2952.451892 | 69.276361   | 51.267952   |
| 2956.827784 | 68.980139   | 51.124393   |
| 2959.021122 | 39.568485   | 29.347801   |
| 2959.878262 | 70.479616   | 52.289615   |
| 2960.369406 | 67.938461   | 50.412668   |
| 2961.055309 | 52.919159   | 39.276929   |
| 2961.535075 | 6.151590    | 4.566488    |
| 2969.706059 | 3.173436    | 2.362225    |
| 2979.587340 | 9.479161    | 7.079525    |
| 2983.177310 | 8.617937    | 6.444073    |
| 2996.614911 | 11.978402   | 8.997211    |
| 3049.104998 | 7.240527    | 5.533764    |
| 3049.352333 | 0.434134    | 0.331825    |
| 3049.905478 | 17.412811   | 13.311694   |
| 3050.498165 | 14.400189   | 11.010753   |
| 3051.020030 | 17.153623   | 13.118343   |
| 3052.256722 | 17.982336   | 13.757681   |
| 3053.467643 | 17.080838   | 13.073160   |
| 3053.806356 | 6.691007    | 5.121663    |
| 3054.424871 | 6.720453    | 5.145245    |
| 3056.033095 | 6.011105    | 4.604584    |
| 3056.153314 | 4.009467    | 3.071425    |
| 3056.734564 | 15.945815   | 12.217505   |
| 3058.628125 | 9.406811    | 7.211858    |
| 3058.860933 | 11.599266   | 8.893410    |
| 3075.605603 | 16.713456   | 12.884720   |
| 3089.363641 | 21.742673   | 16.836819   |
| 3090.327825 | 4.878552    | 3.778971    |
| 3107.017611 | 29.357465   | 22.863374   |
| 3124.115218 | 29.218737   | 22.880555   |
| 3130.696786 | 6.341216    | 4.976129    |
| 3143.286273 | 3.644413    | 2.871373    |
| 3148.097338 | 5.637651    | 4.448611    |
| 3153.646400 | 6.694654    | 5.291993    |
| 3175.436178 | 9.475927    | 7.542289    |
| 3318.431643 | 592.215682  | 492.595965  |
| 3326.652220 | 362.461435  | 302.236754  |
| 3343.998056 | 1704.763733 | 1428.921215 |
| 3356.547809 | 553.298036  | 465.511095  |
| 3373.796007 | 188.388632  | 159.313135  |
| 3382.949724 | 703.625530  | 596.643896  |

Statistical Thermal Analysis \*\*\* ideal gas assumed \*\*\*

Pressure: 1.000000 atm.  
Temperature: 298.150000 K

Moments of Inertia (and direction vectors)

-----  
77308.3644      78439.8719      119606.4908  
-----

|         |         |         |
|---------|---------|---------|
| -0.0119 | 0.9612  | 0.2756  |
| -0.8977 | 0.1111  | -0.4264 |
| -0.4404 | -0.2525 | 0.8616  |

The rotational contribution to the molecular entropy includes a term, dependent on the symmetry number sigma. The results reported below were computed using sigma = 1, determined from the point group symmetry of the input geometry (NOSYM). If this is not the correct symmetry, please contact SCM to report a bug.

| Temp   |                                             | Transl | Rotat  | Vibrat  | Total   |
|--------|---------------------------------------------|--------|--------|---------|---------|
| ----   |                                             | -----  | -----  | -----   | -----   |
| 298.15 | Entropy (cal/mole-K):                       | 47.877 | 41.802 | 298.355 | 388.034 |
|        | Internal Energy (Kcal/mole):                | 0.889  | 0.889  | 824.136 | 825.914 |
|        | Constant Volume Heat Capacity (cal/mole-K): | 2.981  | 2.981  | 326.139 | 332.100 |

\*\*\*\*\*

\*\*\* DONE CALCULATING ANALYTICAL SECOND DERIVATIVES OF THE ENERGY \*\*\*

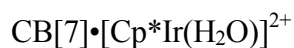

Geometry CYCLE 65  
=====

Energy gradients wrt nuclear displacements  
=====

| Atom | Cartesian (a.u./angstrom) |           |           |
|------|---------------------------|-----------|-----------|
|      | X                         | Y         | Z         |
| 1 H  | -0.000010                 | -0.000012 | 0.000028  |
| 2 C  | -0.000131                 | 0.000138  | -0.000097 |
| 3 C  | 0.000095                  | -0.000026 | -0.000037 |
| 4 H  | 0.000012                  | 0.000034  | -0.000020 |
| 5 H  | -0.000015                 | 0.000005  | -0.000030 |
| 6 C  | -0.000071                 | -0.000268 | 0.000182  |
| 7 C  | 0.000181                  | -0.000135 | -0.000261 |
| 8 H  | -0.000005                 | 0.000035  | 0.000058  |
| 9 H  | -0.000017                 | -0.000024 | -0.000062 |
| 10 C | 0.000124                  | -0.000124 | -0.000150 |
| 11 C | -0.000014                 | 0.000016  | -0.000053 |
| 12 H | -0.000005                 | -0.000002 | 0.000013  |
| 13 H | -0.000020                 | 0.000005  | 0.000007  |
| 14 C | -0.000056                 | 0.000156  | -0.000066 |
| 15 C | 0.000009                  | 0.000074  | 0.000035  |
| 16 H | -0.000031                 | 0.000031  | 0.000022  |
| 17 H | 0.000018                  | 0.000020  | -0.000015 |
| 18 C | 0.000176                  | 0.000158  | 0.000133  |
| 19 C | -0.000128                 | 0.000025  | -0.000040 |
| 20 H | -0.000010                 | 0.000038  | -0.000011 |
| 21 H | 0.000020                  | 0.000019  | -0.000022 |
| 22 C | -0.000199                 | 0.000326  | -0.000030 |
| 23 C | 0.000052                  | -0.000082 | 0.000001  |
| 24 H | -0.000027                 | 0.000048  | -0.000002 |
| 25 H | -0.000006                 | -0.000019 | 0.000008  |
| 26 C | -0.000083                 | -0.000021 | -0.000047 |
| 27 C | 0.000132                  | 0.000013  | 0.000108  |
| 28 H | -0.000013                 | -0.000011 | -0.000002 |
| 29 H | -0.000020                 | 0.000011  | -0.000047 |
| 30 O | 0.000211                  | 0.000021  | -0.000074 |
| 31 O | -0.000010                 | 0.000059  | 0.000002  |
| 32 O | 0.000059                  | 0.000011  | -0.000021 |
| 33 O | -0.000130                 | -0.000419 | -0.000056 |
| 34 O | 0.000002                  | -0.000100 | -0.000040 |
| 35 O | -0.000077                 | -0.000031 | 0.000038  |
| 36 O | -0.000015                 | -0.000154 | 0.000146  |
| 37 O | -0.000128                 | -0.000038 | 0.000070  |
| 38 O | -0.000172                 | 0.000276  | -0.000151 |
| 39 O | -0.000024                 | 0.000190  | 0.000164  |
| 40 O | 0.000241                  | 0.000080  | -0.000151 |
| 41 O | 0.000129                  | -0.000100 | -0.000022 |
| 42 O | 0.000182                  | -0.000283 | 0.000217  |
| 43 O | -0.000226                 | 0.000152  | -0.000317 |
| 44 N | 0.000209                  | 0.000269  | 0.000104  |
| 45 N | -0.000108                 | -0.000168 | 0.000135  |
| 46 N | -0.000238                 | -0.000094 | -0.000108 |
| 47 N | 0.000654                  | 0.000083  | 0.000603  |
| 48 N | 0.000113                  | 0.000147  | -0.000224 |
| 49 N | 0.000004                  | 0.000159  | 0.000085  |
| 50 N | 0.000074                  | -0.000071 | 0.000066  |
| 51 N | -0.000099                 | -0.000060 | -0.000022 |
| 52 N | -0.000012                 | -0.000097 | 0.000041  |
| 53 N | -0.000138                 | -0.000005 | -0.000254 |
| 54 N | -0.000041                 | -0.000065 | 0.000064  |
| 55 N | -0.000064                 | -0.000007 | 0.000052  |
| 56 N | -0.000137                 | 0.000033  | 0.000285  |
| 57 N | 0.000047                  | -0.000008 | 0.000025  |
| 58 N | -0.000619                 | -0.000310 | -0.000211 |
| 59 N | 0.000007                  | 0.000158  | 0.000096  |
| 60 N | -0.000018                 | -0.000054 | -0.000017 |
| 61 N | 0.000179                  | -0.000021 | 0.000053  |
| 62 N | -0.000292                 | 0.000030  | -0.000002 |
| 63 N | 0.000183                  | -0.000122 | -0.000061 |
| 64 N | 0.000058                  | 0.000057  | 0.000026  |
| 65 N | -0.000005                 | 0.000202  | -0.000372 |
| 66 N | 0.000184                  | 0.000010  | -0.000046 |
| 67 N | -0.000086                 | -0.000001 | -0.000032 |
| 68 N | 0.000284                  | -0.000239 | -0.000101 |
| 69 N | -0.000054                 | 0.000144  | -0.000086 |
| 70 N | -0.000083                 | 0.000088  | -0.000069 |
| 71 N | 0.000013                  | -0.000041 | 0.000062  |
| 72 C | 0.000121                  | -0.000067 | -0.000017 |
| 73 C | 0.000065                  | 0.000091  | -0.000004 |
| 74 H | -0.000015                 | -0.000014 | -0.000018 |
| 75 H | 0.000024                  | 0.000060  | -0.000043 |
| 76 C | -0.000173                 | 0.000041  | 0.000228  |
| 77 C | 0.000119                  | 0.000032  | 0.000035  |
| 78 H | -0.000117                 | 0.000065  | 0.000043  |
| 79 H | -0.000025                 | 0.000047  | 0.000008  |
| 80 C | 0.000043                  | -0.000231 | 0.000012  |
| 81 C | -0.000006                 | -0.000024 | 0.000092  |
| 82 H | -0.000034                 | -0.000004 | 0.000013  |
| 83 H | -0.000003                 | 0.000010  | 0.000014  |
| 84 C | 0.000055                  | -0.000007 | 0.000112  |
| 85 C | 0.000067                  | -0.000043 | -0.000054 |

```

86 H -0.000010 0.000008 0.000041
87 H -0.000045 -0.000006 0.000024
88 C 0.000147 0.000192 0.000243
89 C 0.000003 -0.000027 -0.000104
90 H -0.000028 0.000010 0.000027
91 H -0.000021 -0.000022 0.000018
92 C 0.000097 0.000019 -0.000043
93 C -0.000012 0.000009 0.000007
94 H -0.000019 0.000010 -0.000009
95 H -0.000060 0.000013 0.000004
96 C 0.000153 -0.000068 -0.000164
97 C -0.000099 -0.000053 0.000022
98 H 0.000011 -0.000016 -0.000037
99 H -0.000040 -0.000022 0.000041
100 C -0.000109 0.000053 -0.000116
101 H -0.000020 -0.000011 0.000017
102 C -0.000062 0.000010 0.000227
103 H -0.000015 0.000044 -0.000044
104 C -0.000096 0.000005 0.000213
105 H 0.000017 0.000024 -0.000044
106 C 0.000069 0.000169 -0.000026
107 H 0.000015 0.000029 0.000002
108 C 0.000001 0.000135 0.000119
109 H -0.000007 0.000014 -0.000046
110 C -0.000132 0.000100 -0.000057
111 H 0.000002 -0.000023 0.000001
112 C -0.000057 0.000022 -0.000045
113 H -0.000021 0.000014 0.000059
114 C -0.000053 -0.000138 -0.000056
115 H -0.000019 -0.000012 0.000012
116 C -0.000023 0.000078 -0.000099
117 H -0.000044 -0.000010 -0.000014
118 C 0.000072 -0.000120 0.000132
119 H -0.000062 -0.000012 0.000001
120 C 0.000067 -0.000171 -0.000246
121 H -0.000009 0.000017 -0.000020
122 C 0.000216 -0.000300 0.000159
123 H -0.000032 -0.000053 -0.000027
124 C 0.000064 -0.000126 0.000164
125 H -0.000031 0.000026 -0.000027
126 C -0.000039 0.000009 -0.000017
127 H -0.000054 0.000036 0.000009
128 H 0.000019 0.000001 0.000002
129 C -0.000025 0.000051 0.000003
130 Ir -0.000087 0.000211 -0.000326
131 H 0.000017 0.000028 -0.000010
132 C 0.000224 -0.000332 0.000248
133 C 0.000119 -0.000175 0.000055
134 C -0.000227 0.000082 -0.000029
135 C -0.000010 0.000264 0.000235
136 C 0.000119 -0.000251 -0.000145
137 H 0.000003 0.000023 0.000087
138 H 0.000001 0.000024 0.000024
139 H 0.000051 -0.000037 0.000017
140 H -0.000043 0.000009 -0.000043
141 H -0.000006 0.000008 -0.000025
142 C 0.000170 -0.000078 0.000092
143 H 0.000003 0.000003 0.000012
144 H 0.000014 -0.000052 -0.000039
145 O 0.000035 0.000032 0.000028
146 H -0.000045 0.000107 -0.000109
147 C -0.000165 -0.000054 -0.000129
148 H -0.000025 0.000031 -0.000110
149 H -0.000084 0.000139 -0.000047
150 C 0.000083 -0.000142 0.000061
151 H 0.000011 0.000064 -0.000047
152 H 0.000038 0.000031 -0.000056
153 C -0.000051 0.000051 0.000000
154 H 0.000019 0.000031 0.000008
155 H -0.000005 0.000007 0.000016
    
```

dE(predicted): -0.38831E-04, dE(actual): -0.31377E-03, Trust radius: 0.155000, all in a.u.

-----  
 Geometry Convergence after Step 65 \*\* CONVERGED \*\*  
 -----

```

current energy -35.37025203 Hartree
energy change -0.00031377 0.00100000 T
constrained gradient max 0.00065447 0.00100000 T
constrained gradient rms 0.00011692 0.00066667 T
gradient max 0.00065447
gradient rms 0.00011692
cart. step max 0.00858424 0.01000000 T
cart. step rms 0.00205164 0.00666667 T
    
```

|                                | hartree              | eV         | kcal/mol   | kJ/mol     |
|--------------------------------|----------------------|------------|------------|------------|
| Pauli Repulsion                |                      |            |            |            |
| Kinetic (Delta T^0):           | 455.351543763564905  | 12390.7460 | 285737.44  | 1195525.31 |
| Delta V^Pauli Coulomb:         | -236.706143717617465 | -6441.1019 | -148535.36 | -621471.89 |
| Delta V^Pauli LDA-XC:          | -55.403491696626610  | -1507.6057 | -34766.22  | -145461.85 |
| Delta V^Pauli GGA-Exchange:    | 3.408910707569135    | 92.7612    | 2139.12    | 8950.09    |
| Delta V^Pauli GGA-Correlation: | -3.987396625964635   | -108.5026  | -2502.13   | -10468.91  |



|                                                                                               |                               |                     |                     |                     |
|-----------------------------------------------------------------------------------------------|-------------------------------|---------------------|---------------------|---------------------|
| Total Pauli Repulsion:<br>(Total Pauli Repulsion =<br>Delta E^Pauli in BB paper)              | -----<br>162.663422430925323  | -----<br>4426.2969  | -----<br>102072.85  | -----<br>427072.76  |
| Steric Interaction                                                                            |                               |                     |                     |                     |
| Pauli Repulsion (Delta E^Pauli):                                                              | 162.663422430925323           | 4426.2969           | 102072.85           | 427072.76           |
| Electrostatic Interaction:<br>(Electrostatic Interaction =<br>Delta V_elstat in the BB paper) | -----<br>-35.602991227129280  | -----<br>-968.8067  | -----<br>-22341.22  | -----<br>-93475.64  |
| Total Steric Interaction:<br>(Total Steric Interaction =<br>Delta E^0 in the BB paper)        | -----<br>127.060431203796043  | -----<br>3457.4903  | -----<br>79731.63   | -----<br>333597.11  |
| Orbital Interactions                                                                          |                               |                     |                     |                     |
| A:                                                                                            | -162.049522298440507          | -4409.5919          | -101687.62          | -425460.96          |
| Total Orbital Interactions:                                                                   | -----<br>-162.092837773449645 | -----<br>-4410.7705 | -----<br>-101714.80 | -----<br>-425574.69 |
| Alternative Decomposition Orb.Int.                                                            |                               |                     |                     |                     |
| Kinetic:                                                                                      | -419.384461900994097          | -11412.0319         | -263167.75          | -1101093.75         |
| Coulomb:                                                                                      | 235.119454249333359           | 6397.9259           | 147539.70           | 617306.04           |
| XC:                                                                                           | 22.172169878211228            | 603.3354            | 13913.25            | 58213.02            |
| Total Orbital Interactions:                                                                   | -----<br>-162.092837773449503 | -----<br>-4410.7705 | -----<br>-101714.80 | -----<br>-425574.69 |
| Residu (E=Steric+OrbInt+Res):                                                                 | -0.000153006722488            | -0.0042             | -0.10               | -0.40               |
| Dispersion Energy:                                                                            | -0.337691839290378            | -9.1891             | -211.90             | -886.61             |
| Total Bonding Energy:                                                                         | -----<br>-35.370251415666466  | -----<br>-962.4735  | -----<br>-22195.17  | -----<br>-92864.58  |
| Summary of Bonding Energy (energy terms are taken from the energy decomposition above)        |                               |                     |                     |                     |
| Electrostatic Energy:                                                                         | -35.602991227129280           | -968.8067           | -22341.22           | -93475.64           |
| Kinetic Energy:                                                                               | 35.967081862570808            | 978.7141            | 22569.69            | 94431.56            |
| Coulomb (Steric+OrbInt) Energy:                                                               | -1.586842475006591            | -43.1802            | -995.76             | -4166.25            |
| XC Energy:                                                                                    | -33.809807736810882           | -920.0117           | -21215.98           | -88767.64           |
| Dispersion Energy:                                                                            | -0.337691839290378            | -9.1891             | -211.90             | -886.61             |
| Total Bonding Energy:                                                                         | -----<br>-35.370251415666324  | -----<br>-962.4735  | -----<br>-22195.17  | -----<br>-92864.58  |

## H<sub>2</sub>O

Geometry CYCLE 3

Energy gradients wrt nuclear displacements

```

=====
Atom      Cartesian (a.u./angstrom)
      X      Y      Z
-----
 1 H      -0.000152  0.000000  0.000077
 2 O       0.000000  0.000000 -0.000154
 3 H       0.000152  0.000000  0.000077
=====
    
```

dE(predicted): -0.46664E-06, dE(actual): 0.18875E-04, Trust radius: 0.020000, all in a.u.

Geometry Convergence after Step 3 \*\* CONVERGED \*\*

```

=====
current energy          -0.50240820 Hartree
energy change          0.00001887  0.00100000  T
constrained gradient max 0.00015420  0.00100000  T
constrained gradient rms 0.00009538  0.00066667  T
gradient max          0.00015420
gradient rms          0.00009538
cart. step max        0.00012156  0.01000000  T
cart. step rms        0.00005794  0.00666667  T
    
```

|                                               | hartree                   | eV              | kcal/mol       | kJ/mol          |
|-----------------------------------------------|---------------------------|-----------------|----------------|-----------------|
| <b>Pauli Repulsion</b>                        |                           |                 |                |                 |
| Kinetic (Delta T <sup>0</sup> ):              | 3.771264929886803         | 102.6213        | 2366.50        | 9901.45         |
| Delta V <sup>0</sup> Pauli Coulomb:           | -2.033238899598766        | -55.3272        | -1275.88       | -5338.27        |
| Delta V <sup>0</sup> Pauli LDA-XC:            | -0.435698484851745        | -11.8560        | -273.40        | -1143.93        |
| Delta V <sup>0</sup> Pauli GGA-Exchange:      | 0.025567569450018         | 0.6957          | 16.04          | 67.13           |
| Delta V <sup>0</sup> Pauli GGA-Correlation:   | -0.030609805585458        | -0.8329         | -19.21         | -80.37          |
| <b>Total Pauli Repulsion:</b>                 | <b>1.297285309300852</b>  | <b>35.3009</b>  | <b>814.06</b>  | <b>3406.02</b>  |
| <b>Steric Interaction</b>                     |                           |                 |                |                 |
| Pauli Repulsion (Delta E <sup>0</sup> Pauli): | 1.297285309300852         | 35.3009         | 814.06         | 3406.02         |
| Electrostatic Interaction:                    | -0.245357246934792        | -6.6765         | -153.96        | -644.19         |
| <b>Total Steric Interaction:</b>              | <b>1.051928062366060</b>  | <b>28.6244</b>  | <b>660.09</b>  | <b>2761.84</b>  |
| <b>Orbital Interactions</b>                   |                           |                 |                |                 |
| A1:                                           | -0.688824214901492        | -18.7439        | -432.24        | -1808.51        |
| A2:                                           | 0.000000000000000         | 0.0000          | 0.00           | 0.00            |
| B1:                                           | -0.646794635673532        | -17.6002        | -405.87        | -1698.16        |
| B2:                                           | -0.218564591200139        | -5.9474         | -137.15        | -573.84         |
| <b>Total Orbital Interactions:</b>            | <b>-1.554327083423971</b> | <b>-42.2954</b> | <b>-975.36</b> | <b>-4080.89</b> |
| <b>Alternative Decomposition Orb.Int.</b>     |                           |                 |                |                 |
| Kinetic:                                      | -3.289813044948764        | -89.5204        | -2064.39       | -8637.40        |
| Coulomb:                                      | 1.731774202710198         | 47.1240         | 1086.70        | 4546.77         |
| XC:                                           | 0.003711758814596         | 0.1010          | 2.33           | 9.75            |
| <b>Total Orbital Interactions:</b>            | <b>-1.554327083423971</b> | <b>-42.2954</b> | <b>-975.36</b> | <b>-4080.89</b> |
| Residu (E=Steric+OrbInt+Res):                 | -0.000000006240068        | 0.0000          | 0.00           | 0.00            |
| Dispersion Energy:                            | -0.000010396830522        | -0.0003         | -0.01          | -0.03           |
| <b>Total Bonding Energy:</b>                  | <b>-0.502409424128501</b> | <b>-13.6713</b> | <b>-315.27</b> | <b>-1319.08</b> |

Summary of Bonding Energy (energy terms are taken from the energy decomposition above)

|                                 | hartree                   | eV              | kcal/mol       | kJ/mol          |
|---------------------------------|---------------------------|-----------------|----------------|-----------------|
| Electrostatic Energy:           | -0.245357246934792        | -6.6765         | -153.96        | -644.19         |
| Kinetic Energy:                 | 0.481451884938039         | 13.1010         | 302.12         | 1264.05         |
| Coulomb (Steric+OrbInt) Energy: | -0.301464703128636        | -8.2033         | -189.17        | -791.50         |
| XC Energy:                      | -0.437028962172590        | -11.8922        | -274.24        | -1147.42        |
| Dispersion Energy:              | -0.000010396830522        | -0.0003         | -0.01          | -0.03           |
| <b>Total Bonding Energy:</b>    | <b>-0.502409424128501</b> | <b>-13.6713</b> | <b>-315.27</b> | <b>-1319.08</b> |

Intensities

| Frequency<br>cm <sup>-1</sup> | Dipole Strength<br>1e-40 esu <sup>2</sup> cm <sup>2</sup> | Absorption Intensity (degeneracy not counted)<br>km/mole |
|-------------------------------|-----------------------------------------------------------|----------------------------------------------------------|
|-------------------------------|-----------------------------------------------------------|----------------------------------------------------------|

|             |            |           |
|-------------|------------|-----------|
| 1603.158271 | 191.322582 | 76.881297 |
| 3641.921997 | 4.729584   | 4.317493  |
| 3737.508644 | 54.463441  | 51.022925 |

=====  
Statistical Thermal Analysis \*\*\* ideal gas assumed \*\*\*  
=====

Pressure: 1.000000 atm.  
Temperature: 298.150000 K

Moments of Inertia (and direction vectors)  
=====

|        |        |        |
|--------|--------|--------|
| 2.3127 | 4.2392 | 6.5520 |
| -----  | -----  | -----  |
| 1.0000 | 0.0000 | 0.0000 |
| 0.0000 | 0.0000 | 1.0000 |
| 0.0000 | 1.0000 | 0.0000 |

The rotational contribution to the molecular entropy includes a term, dependent on the symmetry number sigma. The results reported below were computed using sigma = 2, determined from the point group symmetry of the input geometry (C(2V)). If this is not the correct symmetry, please contact SCM to report a bug.

| Temp   |                                             | Transl | Rotat  | Vibrat | Total  |
|--------|---------------------------------------------|--------|--------|--------|--------|
| ----   |                                             | -----  | -----  | -----  | -----  |
| 298.15 | Entropy (cal/mole-K):                       | 34.608 | 10.561 | 0.008  | 45.177 |
|        | Internal Energy (Kcal/mole):                | 0.889  | 0.889  | 12.843 | 14.621 |
|        | Constant Volume Heat Capacity (cal/mole-K): | 2.981  | 2.981  | 0.052  | 6.014  |

\*\*\*\*\*

=====  
\*\*\* DONE CALCULATING ANALYTICAL SECOND DERIVATIVES OF THE ENERGY \*\*\*  
=====

## CB7, COSMO

Geometry CYCLE 41

=====  
Energy gradients wrt nuclear displacements  
=====

| Atom | Cartesian (a.u./angstrom) |           |           |
|------|---------------------------|-----------|-----------|
|      | X                         | Y         | Z         |
| 1 H  | 0.000827                  | 0.000121  | -0.000225 |
| 2 C  | 0.000142                  | -0.000083 | -0.000012 |
| 3 C  | 0.000030                  | 0.000213  | 0.000216  |
| 4 H  | -0.000156                 | -0.000112 | -0.000036 |
| 5 H  | 0.000000                  | 0.000154  | -0.000126 |
| 6 C  | -0.000178                 | 0.000683  | -0.000386 |
| 7 C  | -0.000100                 | 0.000412  | 0.000062  |
| 8 H  | 0.000093                  | -0.000143 | 0.000091  |
| 9 H  | 0.000092                  | 0.000017  | -0.000024 |
| 10 C | -0.000075                 | 0.000308  | 0.000015  |
| 11 C | -0.000085                 | 0.000055  | 0.000078  |
| 12 H | -0.000225                 | 0.000109  | 0.000125  |
| 13 H | 0.000024                  | -0.000205 | 0.000120  |
| 14 C | -0.000308                 | 0.000158  | -0.000412 |
| 15 C | -0.000444                 | -0.000261 | 0.000257  |
| 16 H | -0.000174                 | 0.000094  | -0.000270 |
| 17 H | 0.000540                  | 0.000293  | -0.000022 |
| 18 C | -0.000036                 | -0.000177 | -0.000159 |
| 19 C | -0.000018                 | -0.000080 | -0.000218 |
| 20 H | 0.000018                  | -0.000002 | 0.000043  |
| 21 H | 0.000044                  | -0.000068 | 0.000156  |
| 22 C | -0.000008                 | 0.000296  | -0.000749 |
| 23 C | 0.000002                  | 0.000004  | 0.000190  |
| 24 H | -0.000191                 | 0.000251  | 0.000122  |
| 25 H | 0.000074                  | 0.000223  | -0.000072 |
| 26 C | -0.000044                 | -0.000446 | -0.000374 |
| 27 C | 0.000401                  | -0.000173 | -0.000119 |
| 28 H | -0.000192                 | -0.000114 | 0.000031  |
| 29 H | 0.000023                  | -0.000116 | 0.000155  |
| 30 O | -0.000176                 | -0.000378 | -0.000184 |
| 31 O | 0.000193                  | 0.000160  | -0.000103 |
| 32 O | -0.000175                 | 0.000063  | 0.000044  |
| 33 O | 0.000057                  | -0.000193 | 0.000286  |
| 34 O | 0.000137                  | -0.000436 | 0.000675  |
| 35 O | -0.000285                 | 0.000087  | -0.000066 |
| 36 O | -0.000270                 | 0.000330  | -0.000389 |
| 37 O | -0.000347                 | 0.000145  | -0.000266 |
| 38 O | 0.000194                  | -0.000724 | 0.000657  |
| 39 O | 0.000736                  | -0.000408 | 0.000305  |
| 40 O | 0.000085                  | -0.000216 | 0.000570  |
| 41 O | -0.000134                 | 0.000062  | -0.000220 |
| 42 O | -0.000174                 | -0.000094 | 0.000889  |
| 43 O | 0.000176                  | -0.000481 | 0.000565  |
| 44 N | -0.000387                 | -0.000316 | 0.000695  |
| 45 N | 0.000146                  | 0.000057  | -0.000158 |
| 46 N | 0.000072                  | -0.000189 | -0.000101 |
| 47 N | -0.000127                 | -0.000079 | -0.000008 |
| 48 N | 0.000151                  | -0.000027 | -0.000179 |
| 49 N | 0.000371                  | -0.000340 | -0.000358 |
| 50 N | -0.000288                 | 0.000308  | -0.000002 |
| 51 N | 0.000193                  | -0.000408 | -0.000197 |
| 52 N | 0.000146                  | 0.000189  | -0.000090 |
| 53 N | -0.000361                 | 0.000167  | -0.000189 |
| 54 N | 0.000093                  | 0.000259  | 0.000113  |
| 55 N | -0.000540                 | 0.000459  | -0.000447 |
| 56 N | -0.000455                 | -0.000350 | -0.000190 |
| 57 N | 0.000563                  | 0.000528  | -0.000537 |
| 58 N | -0.000210                 | -0.000129 | 0.000379  |
| 59 N | -0.000414                 | 0.000471  | -0.000016 |
| 60 N | 0.000396                  | 0.000217  | 0.000331  |
| 61 N | -0.000220                 | -0.000534 | -0.000135 |
| 62 N | 0.000164                  | 0.000152  | -0.000346 |
| 63 N | -0.000104                 | 0.000256  | -0.000875 |
| 64 N | 0.000120                  | 0.000083  | 0.000148  |
| 65 N | 0.000426                  | -0.000529 | 0.000051  |
| 66 N | -0.000162                 | 0.000407  | -0.000023 |
| 67 N | 0.000356                  | 0.000601  | 0.000294  |
| 68 N | -0.000224                 | -0.000464 | -0.000159 |
| 69 N | 0.000021                  | -0.000034 | 0.000452  |
| 70 N | 0.000327                  | -0.000783 | 0.000370  |
| 71 N | -0.000039                 | 0.000695  | 0.000710  |
| 72 C | 0.000161                  | 0.000577  | 0.000040  |

```

73 C -0.000021 0.000088 0.000170
74 H -0.000158 0.000111 0.000001
75 H -0.000053 -0.000035 -0.000051
76 C 0.000041 -0.000077 -0.000001
77 C -0.000154 0.000039 0.000107
78 H -0.000146 0.000049 -0.000036
79 H 0.000043 -0.000108 -0.000041
80 C -0.000283 0.000119 0.000116
81 C -0.000135 0.000038 0.000107
82 H 0.000072 -0.000035 -0.000025
83 H -0.000008 0.000015 0.000075
84 C 0.000127 0.000311 -0.000167
85 C 0.000004 0.000020 0.000042
86 H -0.000014 0.000019 -0.000005
87 H 0.000099 -0.000001 0.000070
88 C 0.000100 0.000113 -0.000145
89 C 0.000183 -0.000079 0.000187
90 H 0.000041 -0.000077 -0.000042
91 H -0.000025 0.000184 -0.000172
92 C 0.000127 -0.000246 0.000039
93 C 0.000226 -0.000154 -0.000114
94 H 0.000028 -0.000083 -0.000065
95 H -0.000143 0.000035 -0.000067
96 C -0.000225 -0.000410 0.000230
97 C 0.000050 0.000130 -0.000065
98 H -0.000022 0.000031 -0.000193
99 H 0.000002 -0.000081 -0.000024
100 C 0.000205 0.000214 -0.000176
101 H 0.000099 -0.000062 0.000026
102 C -0.000310 0.000092 -0.000220
103 H -0.000130 -0.000016 -0.000041
104 C 0.000084 -0.000219 0.000420
105 H 0.000026 0.000091 0.000009
106 C 0.000113 0.000254 -0.000003
107 H -0.000005 0.000144 0.000165
108 C -0.000165 0.000036 -0.000127
109 H -0.000024 0.000042 0.000073
110 C -0.000113 -0.000011 0.000384
111 H -0.000105 -0.000002 0.000089
112 C 0.000162 0.000239 -0.000228
113 H 0.000028 0.000121 0.000067
114 C 0.000205 -0.000018 0.000000
115 H -0.000188 -0.000303 -0.000020
116 C 0.000098 -0.000160 -0.000055
117 H -0.000144 0.000006 -0.000059
118 C -0.000226 0.000013 -0.000145
119 H 0.000040 -0.000034 -0.000007
120 C -0.000092 -0.000112 -0.000196
121 H -0.000016 0.000022 0.000010
122 C -0.000164 -0.000071 -0.000015
123 H 0.000556 -0.000604 -0.000360
124 C 0.000317 0.000214 -0.000072
125 H -0.000039 -0.000090 -0.000001
126 C -0.000234 -0.000276 -0.000240
    
```

dE(predicted): -0.26415E-04, dE(actual): 0.32288E-03, Trust radius: 0.126000, all in a.u.

-----  
 Geometry Convergence after Step 41 \*\* CONVERGED \*\*  
 -----

```

current energy -30.14406883 Hartree
energy change 0.00032288 0.00100000 T
constrained gradient max 0.00088874 0.00100000 T
constrained gradient rms 0.00025362 0.00066667 T
gradient max 0.00088874
gradient rms 0.00025362
cart. step max 0.00557700 0.01000000 T
cart. step rms 0.00173116 0.00666667 T
    
```

|                                                        | hartree              | eV         | kcal/mol   | kJ/mol     |
|--------------------------------------------------------|----------------------|------------|------------|------------|
| Pauli Repulsion                                        |                      |            |            |            |
| Kinetic (Delta T^0):                                   | 390.524685494696200  | 10626.7174 | 245057.97  | 1025322.42 |
| Delta V^Pauli Coulomb:                                 | -203.136813372561363 | -5527.6339 | -127470.29 | -533335.63 |
| Delta V^Pauli LDA-XC:                                  | -47.424237791662144  | -1290.4792 | -29759.16  | -124512.32 |
| Delta V^Pauli GGA-Exchange:                            | 2.855004534680653    | 77.6886    | 1791.54    | 7495.81    |
| Delta V^Pauli GGA-Correlation:                         | -3.364318767834600   | -91.5478   | -2111.14   | -8833.02   |
| Total Pauli Repulsion:                                 | 139.454320097318742  | 3794.7451  | 87508.92   | 366137.27  |
| (Total Pauli Repulsion =<br>Delta E^Pauli in BB paper) |                      |            |            |            |

|                                                                                        |                      |            |            |            |
|----------------------------------------------------------------------------------------|----------------------|------------|------------|------------|
| Steric Interaction                                                                     |                      |            |            |            |
| Pauli Repulsion (Delta E^Pauli):                                                       | 139.454320097318742  | 3794.7451  | 87508.92   | 366137.27  |
| Electrostatic Interaction:                                                             | -30.683020827985935  | -834.9275  | -19253.89  | -80558.26  |
| (Electrostatic Interaction =<br>Delta V_elstat in the BB paper)                        | -----                | -----      | -----      | -----      |
| Total Steric Interaction:                                                              | 108.771299269332815  | 2959.8176  | 68255.03   | 285579.01  |
| (Total Steric Interaction =<br>Delta E^0 in the BB paper)                              |                      |            |            |            |
| Orbital Interactions                                                                   |                      |            |            |            |
| A:                                                                                     | -138.312527881360381 | -3763.6754 | -86792.43  | -363139.49 |
|                                                                                        | -----                | -----      | -----      | -----      |
| Total Orbital Interactions:                                                            | -138.339006185243136 | -3764.3959 | -86809.05  | -363209.01 |
| Alternative Decomposition Orb.Int.                                                     |                      |            |            |            |
| Kinetic:                                                                               | -361.386382765712426 | -9833.8238 | -226773.40 | -948819.81 |
| Coulomb:                                                                               | 204.060451099841117  | 5552.7674  | 128049.88  | 535760.64  |
| XC:                                                                                    | 18.986925480628212   | 516.6605   | 11914.48   | 49850.17   |
|                                                                                        | -----                | -----      | -----      | -----      |
| Total Orbital Interactions:                                                            | -138.339006185243107 | -3764.3959 | -86809.05  | -363209.01 |
| Residu (E=Steric+OrbInt+Res):                                                          | -0.000092327623535   | -0.0025    | -0.06      | -0.24      |
| Solvation Energy (el):                                                                 | -0.321024833840324   | -8.7355    | -201.45    | -842.85    |
| Dispersion Energy:                                                                     | -0.255207134994591   | -6.9445    | -160.14    | -670.05    |
| Post-SCF Solvation Energies                                                            |                      |            |            |            |
| Solvation Energy (cd):                                                                 | 0.000000000000000    | 0.0000     | 0.00       | 0.00       |
| Total Bonding Energy:                                                                  | -30.144031212368770  | -820.2608  | -18915.67  | -79143.14  |
| Summary of Bonding Energy (energy terms are taken from the energy decomposition above) |                      |            |            |            |
| =====                                                                                  |                      |            |            |            |
| Electrostatic Energy:                                                                  | -30.683020827985935  | -834.9275  | -19253.89  | -80558.26  |
| Kinetic Energy:                                                                        | 29.138302728983774   | 792.8936   | 18284.56   | 76502.60   |
| Coulomb (Steric+OrbInt) Energy:                                                        | 0.923545399656206    | 25.1309    | 579.53     | 2424.77    |
| XC Energy:                                                                             | -28.946626544187879  | -787.6778  | -18164.28  | -75999.36  |
| Solvation:                                                                             | -0.321024833840324   | -8.7355    | -201.45    | -842.85    |
| Dispersion Energy:                                                                     | -0.255207134994591   | -6.9445    | -160.14    | -670.05    |
|                                                                                        | -----                | -----      | -----      | -----      |
| Total Bonding Energy:                                                                  | -30.144031212368748  | -820.2608  | -18915.67  | -79143.14  |

## Cp\*Ir(H<sub>2</sub>O)<sub>3</sub>Cl<sub>2</sub> – 1, COSMO

Geometry CYCLE 65  
 =====

Energy gradients wrt nuclear displacements  
 =====

| Atom  | Cartesian (a.u./angstrom) |           |           |
|-------|---------------------------|-----------|-----------|
|       | X                         | Y         | Z         |
| 1 H   | -0.000043                 | 0.000010  | -0.000055 |
| 2 H   | 0.000037                  | 0.000059  | -0.000015 |
| 3 H   | -0.000163                 | -0.000349 | -0.000479 |
| 4 Ir  | -0.000309                 | 0.000019  | -0.000438 |
| 5 H   | -0.000422                 | -0.000940 | -0.000271 |
| 6 C   | 0.000117                  | 0.000173  | -0.000398 |
| 7 C   | -0.000072                 | -0.000210 | 0.000297  |
| 8 C   | 0.000068                  | -0.000265 | 0.000325  |
| 9 C   | 0.000051                  | -0.000014 | 0.000235  |
| 10 C  | 0.000158                  | 0.000488  | -0.000429 |
| 11 H  | 0.000166                  | -0.000252 | 0.000102  |
| 12 H  | 0.000094                  | -0.000088 | 0.000096  |
| 13 H  | -0.000008                 | -0.000018 | 0.000017  |
| 14 H  | 0.000024                  | -0.000006 | 0.000028  |
| 15 O  | 0.000405                  | 0.000879  | 0.000336  |
| 16 H  | -0.000123                 | 0.000247  | 0.000083  |
| 17 O  | -0.000037                 | 0.000472  | 0.000981  |
| 18 H  | 0.000627                  | -0.000057 | -0.000538 |
| 19 O  | -0.000382                 | -0.000144 | 0.000197  |
| 20 H  | 0.000706                  | -0.000604 | 0.000557  |
| 21 C  | -0.000021                 | 0.000043  | 0.000008  |
| 22 H  | 0.000021                  | -0.000048 | 0.000012  |
| 23 H  | -0.000020                 | -0.000064 | 0.000029  |
| 24 C  | 0.000031                  | 0.000037  | -0.000037 |
| 25 H  | -0.000001                 | 0.000025  | 0.000022  |
| 26 H  | -0.000010                 | 0.000036  | 0.000008  |
| 27 C  | 0.000152                  | 0.000017  | -0.000024 |
| 28 H  | -0.000155                 | 0.000134  | 0.000036  |
| 29 H  | 0.000014                  | -0.000024 | 0.000004  |
| 30 C  | -0.000063                 | -0.000048 | 0.000085  |
| 31 H  | -0.000019                 | 0.000019  | -0.000035 |
| 32 H  | -0.000023                 | -0.000055 | 0.000054  |
| 33 C  | -0.000083                 | -0.000009 | 0.000140  |
| 34 H  | -0.000027                 | 0.000052  | 0.000012  |
| 35 H  | 0.000025                  | -0.000044 | -0.000067 |
| 36 Cl | -0.000407                 | 0.000694  | -0.000902 |
| 37 Cl | -0.000307                 | -0.000165 | 0.000024  |

dE(predicted): -0.64971E-05, dE(actual): 0.87504E-06, Trust radius: 0.037000, all in a.u.

-----  
 Geometry Convergence after Step 65 \*\* CONVERGED \*\*  
 -----

|                          |                     |            |   |
|--------------------------|---------------------|------------|---|
| current energy           | -7.09954167 Hartree |            |   |
| energy change            | 0.00000088          | 0.00100000 | T |
| constrained gradient max | 0.00098114          | 0.00100000 | T |
| constrained gradient rms | 0.00028591          | 0.00066667 | T |
| gradient max             | 0.00098114          |            |   |
| gradient rms             | 0.00028591          |            |   |
| cart. step max           | 0.00548764          | 0.01000000 | T |
| cart. step rms           | 0.00185841          | 0.00666667 | T |

|                                                        | hartree             | eV         | kcal/mol  | kJ/mol    |
|--------------------------------------------------------|---------------------|------------|-----------|-----------|
|                                                        | -----               | -----      | -----     | -----     |
| Pauli Repulsion                                        |                     |            |           |           |
| Kinetic (Delta T^0):                                   | 72.262089706671148  | 1966.3515  | 45345.15  | 189724.09 |
| Delta V^Pauli Coulomb:                                 | -37.998758253898167 | -1033.9988 | -23844.58 | -99765.73 |
| Delta V^Pauli LDA-XC:                                  | -8.774032872173851  | -238.7536  | -5505.79  | -23036.22 |
| Delta V^Pauli GGA-Exchange:                            | 0.597087242477190   | 16.2476    | 374.68    | 1567.65   |
| Delta V^Pauli GGA-Correlation:                         | -0.677190722200267  | -18.4273   | -424.94   | -1777.96  |
| -----                                                  |                     |            |           |           |
| Total Pauli Repulsion:                                 | 25.409195100876055  | 691.4194   | 15944.51  | 66711.83  |
| (Total Pauli Repulsion =<br>Delta E^Pauli in BB paper) |                     |            |           |           |
| Steric Interaction                                     |                     |            |           |           |
| Pauli Repulsion (Delta E^Pauli):                       | 25.409195100876055  | 691.4194   | 15944.51  | 66711.83  |

|                                                                                                          |                     |            |           |            |
|----------------------------------------------------------------------------------------------------------|---------------------|------------|-----------|------------|
| Electrostatic Interaction:<br>(Electrostatic Interaction =<br>Delta V <sub>elstat</sub> in the BB paper) | -5.372791238592933  | -146.2011  | -3371.48  | -14106.26  |
| -----                                                                                                    |                     |            |           |            |
| Total Steric Interaction:<br>(Total Steric Interaction =<br>Delta E <sup>0</sup> in the BB paper)        | 20.036403862283123  | 545.2183   | 12573.03  | 52605.57   |
| -----                                                                                                    |                     |            |           |            |
| Orbital Interactions<br>A:                                                                               | -26.966417656317603 | -733.7936  | -16921.68 | -70800.32  |
| -----                                                                                                    |                     |            |           |            |
| Total Orbital Interactions:                                                                              | -26.971205996684429 | -733.9239  | -16924.69 | -70812.89  |
| -----                                                                                                    |                     |            |           |            |
| Alternative Decomposition Orb.Int.                                                                       |                     |            |           |            |
| Kinetic:                                                                                                 | -64.434255771106891 | -1753.3453 | -40433.11 | -169172.11 |
| Coulomb:                                                                                                 | 34.963333635566599  | 951.4007   | 21939.83  | 91796.22   |
| XC:                                                                                                      | 2.499716138855844   | 68.0207    | 1568.60   | 6563.00    |
| -----                                                                                                    |                     |            |           |            |
| Total Orbital Interactions:                                                                              | -26.971205996684446 | -733.9239  | -16924.69 | -70812.89  |
| -----                                                                                                    |                     |            |           |            |
| Residu (E=Steric+OrbInt+Res):                                                                            | -0.000003072897645  | -0.0001    | 0.00      | -0.01      |
| -----                                                                                                    |                     |            |           |            |
| Solvation Energy (el):                                                                                   | -0.110952906966446  | -3.0192    | -69.62    | -291.31    |
| Dispersion Energy:                                                                                       | -0.059116808814555  | -1.6087    | -37.10    | -155.21    |
| -----                                                                                                    |                     |            |           |            |
| Post-SCF Solvation Energies<br>Solvation Energy (cd):                                                    | 0.005332960874095   | 0.1451     | 3.35      | 14.00      |
| -----                                                                                                    |                     |            |           |            |
| Total Bonding Energy:                                                                                    | -7.099541962205857  | -193.1884  | -4455.03  | -18639.84  |

Summary of Bonding Energy (energy terms are taken from the energy decomposition above)

|                                 |                    |           |          |           |
|---------------------------------|--------------------|-----------|----------|-----------|
| Electrostatic Energy:           | -5.372791238592933 | -146.2011 | -3371.48 | -14106.26 |
| Kinetic Energy:                 | 7.827833935564257  | 213.0062  | 4912.04  | 20551.98  |
| Coulomb (Steric+OrbInt) Energy: | -3.035427691229216 | -82.5982  | -1904.76 | -7969.51  |
| XC Energy:                      | -6.354420213041084 | -172.9126 | -3987.46 | -16683.53 |
| Solvation:                      | -0.105619946092351 | -2.8741   | -66.28   | -277.31   |
| Dispersion Energy:              | -0.059116808814555 | -1.6087   | -37.10   | -155.21   |
| -----                           |                    |           |          |           |
| Total Bonding Energy:           | -7.099541962205882 | -193.1884 | -4455.03 | -18639.84 |

Single point energy in the gas phase of the COSMO geometry:

|                                                                                                          | hartree             | eV         | kcal/mol  | kJ/mol     |
|----------------------------------------------------------------------------------------------------------|---------------------|------------|-----------|------------|
|                                                                                                          | -----               | -----      | -----     | -----      |
| Pauli Repulsion                                                                                          |                     |            |           |            |
| Kinetic (Delta T <sup>0</sup> ):                                                                         | 72.262083217430671  | 1966.3513  | 45345.15  | 189724.07  |
| Delta V <sup>0</sup> Pauli Coulomb:                                                                      | -37.998765178439768 | -1033.9990 | -23844.59 | -99765.74  |
| Delta V <sup>0</sup> Pauli LDA-XC:                                                                       | -8.774032125416332  | -238.7536  | -5505.79  | -23036.22  |
| Delta V <sup>0</sup> Pauli GGA-Exchange:                                                                 | 0.597088717948498   | 16.2476    | 374.68    | 1567.66    |
| Delta V <sup>0</sup> Pauli GGA-Correlation:                                                              | -0.677190955645576  | -18.4273   | -424.94   | -1777.96   |
| -----                                                                                                    |                     |            |           |            |
| Total Pauli Repulsion:<br>(Total Pauli Repulsion =<br>Delta E <sup>0</sup> Pauli in BB paper)            | 25.409183675877493  | 691.4191   | 15944.51  | 66711.80   |
| -----                                                                                                    |                     |            |           |            |
| Steric Interaction                                                                                       |                     |            |           |            |
| Pauli Repulsion (Delta E <sup>0</sup> Pauli):                                                            | 25.409183675877493  | 691.4191   | 15944.51  | 66711.80   |
| Electrostatic Interaction:<br>(Electrostatic Interaction =<br>Delta V <sub>elstat</sub> in the BB paper) | -5.372791238469266  | -146.2011  | -3371.48  | -14106.26  |
| -----                                                                                                    |                     |            |           |            |
| Total Steric Interaction:<br>(Total Steric Interaction =<br>Delta E <sup>0</sup> in the BB paper)        | 20.036392437408228  | 545.2180   | 12573.03  | 52605.54   |
| -----                                                                                                    |                     |            |           |            |
| Orbital Interactions<br>A:                                                                               | -26.993205189365639 | -734.5225  | -16938.49 | -70870.65  |
| -----                                                                                                    |                     |            |           |            |
| Total Orbital Interactions:                                                                              | -26.993205189368446 | -734.5225  | -16938.49 | -70870.65  |
| -----                                                                                                    |                     |            |           |            |
| Alternative Decomposition Orb.Int.                                                                       |                     |            |           |            |
| Kinetic:                                                                                                 | -64.454392155588110 | -1753.8932 | -40445.75 | -169224.98 |
| Coulomb:                                                                                                 | 34.933342810991824  | 950.5846   | 21921.01  | 91717.48   |
| XC:                                                                                                      | 2.527844155227831   | 68.7861    | 1586.25   | 6636.85    |
| -----                                                                                                    |                     |            |           |            |
| Total Orbital Interactions:                                                                              | -26.993205189368453 | -734.5225  | -16938.49 | -70870.65  |



|                               |                    |           |          |           |
|-------------------------------|--------------------|-----------|----------|-----------|
| Residu (E=Steric+OrbInt+Res): | -0.000003869159086 | -0.0001   | 0.00     | -0.01     |
| Dispersion Energy:            | -0.059116808813129 | -1.6087   | -37.10   | -155.21   |
| Total Bonding Energy:         | -7.015933429932432 | -190.9133 | -4402.57 | -18420.33 |

Summary of Bonding Energy (energy terms are taken from the energy decomposition above)

```
=====
```

|                                 |                    |           |          |           |
|---------------------------------|--------------------|-----------|----------|-----------|
| Electrostatic Energy:           | -5.372791238469266 | -146.2011 | -3371.48 | -14106.26 |
| Kinetic Energy:                 | 7.807691061842561  | 212.4581  | 4899.40  | 20499.09  |
| Coulomb (Steric+OrbInt) Energy: | -3.065426236607031 | -83.4145  | -1923.58 | -8048.28  |
| XC Energy:                      | -6.326290207885579 | -172.1471 | -3969.81 | -16609.67 |
| Dispersion Energy:              | -0.059116808813129 | -1.6087   | -37.10   | -155.21   |
| Total Bonding Energy:           | -7.015933429932444 | -190.9133 | -4402.57 | -18420.33 |

```
=====
```

## Cp\*Ir(H<sub>2</sub>O)<sub>3</sub>Cl<sub>2</sub> – 2, COSMO

Geometry CYCLE 2  
 =====

Energy gradients wrt nuclear displacements  
 =====

| Atom  | Cartesian (a.u./angstrom) |           |           |
|-------|---------------------------|-----------|-----------|
|       | X                         | Y         | Z         |
| 1 H   | -0.000055                 | 0.000199  | 0.000039  |
| 2 H   | 0.000000                  | 0.000027  | -0.000060 |
| 3 H   | 0.000044                  | 0.000056  | -0.000625 |
| 4 Ir  | -0.000306                 | 0.001917  | 0.003007  |
| 5 H   | -0.000103                 | 0.000074  | 0.000054  |
| 6 C   | -0.000139                 | 0.000206  | 0.000070  |
| 7 C   | -0.000831                 | -0.000379 | -0.001082 |
| 8 C   | 0.000009                  | -0.000166 | 0.000792  |
| 9 C   | 0.002004                  | -0.000997 | 0.002356  |
| 10 C  | 0.000379                  | -0.000799 | 0.000076  |
| 11 H  | 0.000163                  | 0.000028  | 0.000115  |
| 12 H  | 0.000026                  | 0.000005  | -0.000002 |
| 13 H  | 0.000030                  | 0.000021  | -0.000054 |
| 14 H  | 0.000104                  | 0.000269  | -0.000023 |
| 15 O  | 0.000328                  | -0.001244 | -0.000481 |
| 16 H  | -0.000058                 | -0.000002 | -0.000003 |
| 17 O  | -0.001295                 | -0.000089 | -0.001197 |
| 18 H  | 0.000289                  | 0.000010  | 0.000272  |
| 19 O  | -0.000105                 | 0.000413  | -0.000089 |
| 20 H  | -0.000001                 | -0.000302 | 0.000139  |
| 21 C  | -0.000081                 | -0.000076 | -0.000234 |
| 22 H  | -0.000084                 | 0.000008  | 0.000078  |
| 23 H  | -0.000025                 | 0.000020  | -0.000024 |
| 24 C  | 0.000231                  | 0.000010  | -0.000579 |
| 25 H  | 0.000026                  | -0.000054 | 0.000099  |
| 26 H  | 0.000042                  | -0.000029 | -0.000039 |
| 27 C  | 0.000378                  | 0.000885  | -0.000576 |
| 28 H  | 0.000016                  | -0.000010 | 0.000087  |
| 29 H  | -0.000197                 | -0.000198 | 0.000023  |
| 30 C  | 0.000181                  | 0.000144  | 0.000074  |
| 31 H  | 0.000063                  | -0.000056 | -0.000020 |
| 32 H  | 0.000065                  | -0.000031 | 0.000053  |
| 33 C  | -0.000063                 | 0.000088  | -0.000157 |
| 34 H  | 0.000004                  | 0.000017  | -0.000018 |
| 35 H  | 0.000029                  | -0.000074 | 0.000109  |
| 36 Cl | -0.000096                 | -0.000261 | 0.000262  |
| 37 Cl | -0.000972                 | 0.000371  | -0.002441 |

dE(predicted): -0.83649E-04, dE(actual): 0.21220E-03, Trust radius: 0.037000, all in a.u.  
 Residual max backtransformation error 0.1320E-02

-----  
 Geometry Convergence after Step 2 \*\* CONVERGED \*\*  
 -----

|                          |                     |            |   |
|--------------------------|---------------------|------------|---|
| current energy           | -7.09776887 Hartree |            |   |
| energy change            | 0.00021220          | 0.00100000 | T |
| constrained gradient max | 0.00300652          | 0.01000000 | T |
| constrained gradient rms | 0.00061577          | 0.00666667 | T |
| gradient max             | 0.00300652          |            |   |
| gradient rms             | 0.00061577          |            |   |
| cart. step max           | 0.01812398          | 0.02000000 | T |
| cart. step rms           | 0.00487340          | 0.01333333 | T |

|                                                        | hartree             | eV         | kcal/mol  | kJ/mol    |
|--------------------------------------------------------|---------------------|------------|-----------|-----------|
|                                                        | -----               | -----      | -----     | -----     |
| Pauli Repulsion                                        |                     |            |           |           |
| Kinetic (Delta T^0):                                   | 71.504887592261099  | 1945.7470  | 44870.00  | 187736.06 |
| Delta V^Pauli Coulomb:                                 | -37.399873993165826 | -1017.7024 | -23468.78 | -98193.36 |
| Delta V^Pauli LDA-XC:                                  | -8.694668411037181  | -236.5940  | -5455.99  | -22827.85 |
| Delta V^Pauli GGA-Exchange:                            | 0.591656958943663   | 16.0998    | 371.27    | 1553.40   |
| Delta V^Pauli GGA-Correlation:                         | -0.671697696212592  | -18.2778   | -421.50   | -1763.54  |
| -----                                                  |                     |            |           |           |
| Total Pauli Repulsion:                                 | 25.330304450789164  | 689.2727   | 15895.01  | 66504.70  |
| (Total Pauli Repulsion =<br>Delta E^Pauli in BB paper) |                     |            |           |           |
| Steric Interaction                                     |                     |            |           |           |
| Pauli Repulsion (Delta E^Pauli):                       | 25.330304450789164  | 689.2727   | 15895.01  | 66504.70  |

|                                                                                               |                     |            |           |            |
|-----------------------------------------------------------------------------------------------|---------------------|------------|-----------|------------|
| Electrostatic Interaction:<br>(Electrostatic Interaction =<br>Delta V_elstat in the BB paper) | -5.337777566826345  | -145.2483  | -3349.51  | -14014.33  |
| -----                                                                                         |                     |            |           |            |
| Total Steric Interaction:<br>(Total Steric Interaction =<br>Delta E^0 in the BB paper)        | 19.992526883962817  | 544.0243   | 12545.50  | 52490.37   |
| -----                                                                                         |                     |            |           |            |
| Orbital Interactions                                                                          |                     |            |           |            |
| A:                                                                                            | -26.879816001376792 | -731.4370  | -16867.34 | -70572.95  |
| -----                                                                                         |                     |            |           |            |
| Total Orbital Interactions:                                                                   | -26.881474042496048 | -731.4821  | -16868.38 | -70577.30  |
| -----                                                                                         |                     |            |           |            |
| Alternative Decomposition Orb.Int.                                                            |                     |            |           |            |
| Kinetic:                                                                                      | -63.773791170685321 | -1735.3732 | -40018.66 | -167438.07 |
| Coulomb:                                                                                      | 34.454194517950739  | 937.5463   | 21620.34  | 90459.47   |
| XC:                                                                                           | 2.438122610238524   | 66.3447    | 1529.95   | 6401.29    |
| -----                                                                                         |                     |            |           |            |
| Total Orbital Interactions:                                                                   | -26.881474042496059 | -731.4821  | -16868.38 | -70577.30  |
| -----                                                                                         |                     |            |           |            |
| Residu (E=Steric+OrbInt+Res):                                                                 | -0.000009406513380  | -0.0003    | -0.01     | -0.02      |
| -----                                                                                         |                     |            |           |            |
| Solvation Energy (el):                                                                        | -0.153978835357109  | -4.1900    | -96.62    | -404.27    |
| Dispersion Energy:                                                                            | -0.060106674715891  | -1.6356    | -37.72    | -157.81    |
| -----                                                                                         |                     |            |           |            |
| Post-SCF Solvation Energies                                                                   |                     |            |           |            |
| Solvation Energy (cd):                                                                        | 0.005337242839705   | 0.1452     | 3.35      | 14.01      |
| -----                                                                                         |                     |            |           |            |
| Total Bonding Energy:                                                                         | -7.097704832279907  | -193.1384  | -4453.88  | -18635.02  |
| -----                                                                                         |                     |            |           |            |
| Summary of Bonding Energy (energy terms are taken from the energy decomposition above)        |                     |            |           |            |
| =====                                                                                         |                     |            |           |            |
| Electrostatic Energy:                                                                         | -5.337777566826345  | -145.2483  | -3349.51  | -14014.33  |
| Kinetic Energy:                                                                               | 7.731096421575778   | 210.3738   | 4851.34   | 20297.99   |
| Coulomb (Steric+OrbInt) Energy:                                                               | -2.945688881728465  | -80.1563   | -1848.45  | -7733.91   |
| XC Energy:                                                                                    | -6.336586538067586  | -172.4273  | -3976.27  | -16636.71  |
| Solvation:                                                                                    | -0.148641592517404  | -4.0447    | -93.27    | -390.26    |
| Dispersion Energy:                                                                            | -0.060106674715891  | -1.6356    | -37.72    | -157.81    |
| -----                                                                                         |                     |            |           |            |
| Total Bonding Energy:                                                                         | -7.097704832279913  | -193.1384  | -4453.88  | -18635.02  |
| -----                                                                                         |                     |            |           |            |
| Single point gas phase energies from COSMO geometries:                                        |                     |            |           |            |
|                                                                                               | hartree             | eV         | kcal/mol  | kJ/mol     |
|                                                                                               | -----               | -----      | -----     | -----      |
| Pauli Repulsion                                                                               |                     |            |           |            |
| Kinetic (Delta T^0):                                                                          | 71.504612419518395  | 1945.7395  | 44869.83  | 187735.33  |
| Delta V^Pauli Coulomb:                                                                        | -37.399693388037164 | -1017.6974 | -23468.66 | -98192.88  |
| Delta V^Pauli LDA-XC:                                                                         | -8.694619059591060  | -236.5926  | -5455.96  | -22827.72  |
| Delta V^Pauli GGA-Exchange:                                                                   | 0.591658771739848   | 16.0999    | 371.27    | 1553.40    |
| Delta V^Pauli GGA-Correlation:                                                                | -0.671690897714553  | -18.2776   | -421.49   | -1763.52   |
| -----                                                                                         |                     |            |           |            |
| Total Pauli Repulsion:<br>(Total Pauli Repulsion =<br>Delta E^Pauli in BB paper)              | 25.330267845915465  | 689.2717   | 15894.98  | 66504.61   |
| -----                                                                                         |                     |            |           |            |
| Steric Interaction                                                                            |                     |            |           |            |
| Pauli Repulsion (Delta E^Pauli):                                                              | 25.330267845915465  | 689.2717   | 15894.98  | 66504.61   |
| Electrostatic Interaction:<br>(Electrostatic Interaction =<br>Delta V_elstat in the BB paper) | -5.337777566794422  | -145.2483  | -3349.51  | -14014.33  |
| -----                                                                                         |                     |            |           |            |
| Total Steric Interaction:<br>(Total Steric Interaction =<br>Delta E^0 in the BB paper)        | 19.992490279121043  | 544.0233   | 12545.48  | 52490.28   |
| -----                                                                                         |                     |            |           |            |
| Orbital Interactions                                                                          |                     |            |           |            |
| A:                                                                                            | -26.914035289440864 | -732.3682  | -16888.81 | -70662.79  |
| -----                                                                                         |                     |            |           |            |
| Total Orbital Interactions:                                                                   | -26.914035289442953 | -732.3682  | -16888.81 | -70662.79  |
| -----                                                                                         |                     |            |           |            |
| Alternative Decomposition Orb.Int.                                                            |                     |            |           |            |
| Kinetic:                                                                                      | -63.685215895466357 | -1732.9629 | -39963.08 | -167205.51 |
| Coulomb:                                                                                      | 34.319119811329472  | 933.8708   | 21535.58  | 90104.84   |
| XC:                                                                                           | 2.452060794693948   | 66.7240    | 1538.69   | 6437.88    |
| -----                                                                                         |                     |            |           |            |
| Total Orbital Interactions:                                                                   | -26.914035289442936 | -732.3682  | -16888.81 | -70662.79  |
| -----                                                                                         |                     |            |           |            |
| Residu (E=Steric+OrbInt+Res):                                                                 | -0.000013272513979  | -0.0004    | -0.01     | -0.03      |

|                       |                    |           |          |           |
|-----------------------|--------------------|-----------|----------|-----------|
| Dispersion Energy:    | -0.060106674714863 | -1.6356   | -37.72   | -157.81   |
| Total Bonding Energy: | -6.981664957550752 | -189.9808 | -4381.06 | -18330.36 |

Summary of Bonding Energy (energy terms are taken from the energy decomposition above)

```
=====
```

|                                 |                    |           |          |           |
|---------------------------------|--------------------|-----------|----------|-----------|
| Electrostatic Energy:           | -5.337777566794422 | -145.2483 | -3349.51 | -14014.33 |
| Kinetic Energy:                 | 7.819396524052038  | 212.7766  | 4906.75  | 20529.82  |
| Coulomb (Steric+OrbInt) Energy: | -3.080586849221675 | -83.8270  | -1933.10 | -8088.08  |
| XC Energy:                      | -6.322590390871817 | -172.0464 | -3967.49 | -16599.96 |
| Dispersion Energy:              | -0.060106674714863 | -1.6356   | -37.72   | -157.81   |
|                                 | -----              | -----     | -----    | -----     |
| Total Bonding Energy:           | -6.981664957550738 | -189.9808 | -4381.06 | -18330.36 |



## Cp\*Ir(H<sub>2</sub>O)<sub>3</sub>Cl<sub>2</sub> -3, COSMO

Geometry CYCLE 3

Energy gradients wrt nuclear displacements

| Atom  | Cartesian (a.u./angstrom) |           |           |
|-------|---------------------------|-----------|-----------|
|       | X                         | Y         | Z         |
| 1 H   | -0.000666                 | -0.000656 | 0.000592  |
| 2 H   | 0.000423                  | -0.000566 | -0.000284 |
| 3 H   | 0.000192                  | -0.000733 | -0.000637 |
| 4 Ir  | -0.003990                 | -0.002557 | 0.005755  |
| 5 H   | 0.000437                  | -0.000754 | 0.000034  |
| 6 C   | 0.004179                  | -0.001892 | -0.005139 |
| 7 C   | -0.006926                 | 0.000067  | -0.000391 |
| 8 C   | -0.000207                 | 0.002580  | 0.002801  |
| 9 C   | 0.005030                  | -0.000351 | -0.004775 |
| 10 C  | -0.000425                 | 0.001756  | -0.000864 |
| 11 H  | 0.000262                  | 0.000191  | -0.001371 |
| 12 H  | -0.005300                 | 0.000576  | -0.006757 |
| 13 H  | 0.000106                  | 0.000512  | 0.000298  |
| 14 H  | -0.000947                 | 0.001221  | 0.001787  |
| 15 O  | -0.000900                 | -0.000578 | 0.001491  |
| 16 H  | 0.000678                  | -0.000084 | 0.000770  |
| 17 O  | -0.002242                 | -0.001878 | 0.000347  |
| 18 H  | -0.000023                 | -0.000364 | -0.000051 |
| 19 O  | 0.005554                  | -0.000879 | -0.000269 |
| 20 H  | -0.001563                 | 0.001124  | 0.000695  |
| 21 C  | -0.000863                 | -0.000302 | 0.001040  |
| 22 H  | -0.000860                 | 0.000817  | -0.000279 |
| 23 H  | -0.000480                 | 0.001170  | 0.000065  |
| 24 C  | 0.002292                  | 0.001355  | -0.000206 |
| 25 H  | -0.000988                 | -0.001485 | -0.000393 |
| 26 H  | -0.000634                 | 0.001826  | -0.000396 |
| 27 C  | -0.000950                 | -0.006565 | 0.002709  |
| 28 H  | -0.000650                 | -0.000983 | -0.001272 |
| 29 H  | 0.004246                  | 0.006304  | 0.005780  |
| 30 C  | 0.000691                  | -0.000675 | 0.000714  |
| 31 H  | 0.000213                  | -0.000174 | 0.000219  |
| 32 H  | 0.000483                  | 0.000896  | -0.001077 |
| 33 C  | -0.001239                 | -0.003470 | 0.002943  |
| 34 H  | 0.002597                  | -0.001150 | -0.000196 |
| 35 H  | 0.000554                  | 0.000815  | 0.002131  |
| 36 Cl | 0.002829                  | 0.003849  | 0.000332  |
| 37 Cl | -0.000914                 | 0.001037  | -0.006146 |

dE(predicted): -0.12519E-02, dE(actual): -0.30292E-03, Trust radius: 0.037000, all in a.u.  
 Residual max backtransformation error 0.6071E-01

Geometry Convergence after Step 3 \*\* CONVERGED \*\*

|                          |                     |            |   |
|--------------------------|---------------------|------------|---|
| current energy           | -7.08074322 Hartree |            |   |
| energy change            | -0.00030292         | 0.00100000 | T |
| constrained gradient max | 0.00692570          | 0.01000000 | T |
| constrained gradient rms | 0.00236283          | 0.00666667 | T |
| gradient max             | 0.00692570          |            |   |
| gradient rms             | 0.00236283          |            |   |
| cart. step max           | 0.00891802          | 0.02000000 | T |
| cart. step rms           | 0.00289789          | 0.01333333 | T |

|                                                        | hartree             | eV         | kcal/mol  | kJ/mol    |
|--------------------------------------------------------|---------------------|------------|-----------|-----------|
| <b>Pauli Repulsion</b>                                 |                     |            |           |           |
| Kinetic (Delta T^0):                                   | 71.153757065800946  | 1936.1922  | 44649.66  | 186814.16 |
| Delta V^Pauli Coulomb:                                 | -37.120579586130980 | -1010.1024 | -23293.52 | -97460.07 |
| Delta V^Pauli LDA-XC:                                  | -8.640327292185013  | -235.1153  | -5421.89  | -22685.18 |
| Delta V^Pauli GGA-Exchange:                            | 0.582680640660179   | 15.8555    | 365.64    | 1529.83   |
| Delta V^Pauli GGA-Correlation:                         | -0.665324181573860  | -18.1044   | -417.50   | -1746.81  |
| Total Pauli Repulsion:                                 | 25.310206646571274  | 688.7258   | 15882.40  | 66451.94  |
| (Total Pauli Repulsion =<br>Delta E^Pauli in BB paper) |                     |            |           |           |
| <b>Steric Interaction</b>                              |                     |            |           |           |
| Pauli Repulsion (Delta E^Pauli):                       | 25.310206646571274  | 688.7258   | 15882.40  | 66451.94  |
| Electrostatic Interaction:                             | -5.331659516089392  | -145.0818  | -3345.67  | -13998.27 |

|                                                                            |                     |            |           |            |
|----------------------------------------------------------------------------|---------------------|------------|-----------|------------|
| (Electrostatic Interaction =<br>Delta V <sub>elstat</sub> in the BB paper) |                     |            |           |            |
| Total Steric Interaction:                                                  | 19.978547130481882  | 543.6439   | 12536.73  | 52453.67   |
| (Total Steric Interaction =<br>Delta E <sup>0</sup> in the BB paper)       |                     |            |           |            |
| Orbital Interactions                                                       |                     |            |           |            |
| A:                                                                         | -26.759256726212381 | -728.1564  | -16791.69 | -70256.42  |
| Total Orbital Interactions:                                                | -26.760021421835265 | -728.1772  | -16792.17 | -70258.43  |
| Alternative Decomposition Orb.Int.                                         |                     |            |           |            |
| Kinetic:                                                                   | -63.398015768544816 | -1725.1478 | -39782.86 | -166451.47 |
| Coulomb:                                                                   | 34.253365197798821  | 932.0815   | 21494.31  | 89932.20   |
| XC:                                                                        | 2.384629148910746   | 64.8891    | 1496.38   | 6260.84    |
| Total Orbital Interactions:                                                | -26.760021421835248 | -728.1772  | -16792.17 | -70258.43  |
| Residu (E=Steric+OrbInt+Res):                                              | -0.000001776927524  | 0.0000     | 0.00      | 0.00       |
| Solvation Energy (el):                                                     | -0.249185601322561  | -6.7807    | -156.37   | -654.24    |
| Dispersion Energy:                                                         | -0.055152974514315  | -1.5008    | -34.61    | -144.80    |
| Post-SCF Solvation Energies                                                |                     |            |           |            |
| Solvation Energy (cd):                                                     | 0.005576425333467   | 0.1517     | 3.50      | 14.64      |
| Total Bonding Energy:                                                      | -7.080238218784316  | -192.6631  | -4442.92  | -18589.16  |

Summary of Bonding Energy (energy terms are taken from the energy decomposition above)

|                                 |                    |           |          |           |
|---------------------------------|--------------------|-----------|----------|-----------|
| Electrostatic Energy:           | -5.331659516089392 | -145.0818 | -3345.67 | -13998.27 |
| Kinetic Energy:                 | 7.755741297256129  | 211.0445  | 4866.80  | 20362.70  |
| Coulomb (Steric+OrbInt) Energy: | -2.867216165259684 | -78.0209  | -1799.21 | -7527.87  |
| XC Energy:                      | -6.338341684187947 | -172.4751 | -3977.37 | -16641.31 |
| Solvation:                      | -0.243609175989094 | -6.6289   | -152.87  | -639.60   |
| Dispersion Energy:              | -0.055152974514315 | -1.5008   | -34.61   | -144.80   |
| Total Bonding Energy:           | -7.080238218784302 | -192.6631 | -4442.92 | -18589.16 |

Single point gas phase energy from the COSMO geometry

|                                                                            | hartree             | eV         | kcal/mol  | kJ/mol     |
|----------------------------------------------------------------------------|---------------------|------------|-----------|------------|
|                                                                            | -----               | -----      | -----     | -----      |
| Pauli Repulsion                                                            |                     |            |           |            |
| Kinetic (Delta T <sup>0</sup> ):                                           | 71.153755595825956  | 1936.1922  | 44649.66  | 186814.16  |
| Delta V <sup>Pauli</sup> Coulomb:                                          | -37.120582933805970 | -1010.1025 | -23293.52 | -97460.08  |
| Delta V <sup>Pauli</sup> LDA-XC:                                           | -8.640329033827005  | -235.1153  | -5421.89  | -22685.18  |
| Delta V <sup>Pauli</sup> GGA-Exchange:                                     | 0.582678622964330   | 15.8555    | 365.64    | 1529.82    |
| Delta V <sup>Pauli</sup> GGA-Correlation:                                  | -0.665324981370622  | -18.1044   | -417.50   | -1746.81   |
| Total Pauli Repulsion:                                                     | 25.310197269786691  | 688.7255   | 15882.39  | 66451.91   |
| (Total Pauli Repulsion =<br>Delta E <sup>Pauli</sup> in BB paper)          |                     |            |           |            |
| Steric Interaction                                                         |                     |            |           |            |
| Pauli Repulsion (Delta E <sup>Pauli</sup> ):                               | 25.310197269786691  | 688.7255   | 15882.39  | 66451.91   |
| Electrostatic Interaction:                                                 | -5.331659515663390  | -145.0818  | -3345.67  | -13998.27  |
| (Electrostatic Interaction =<br>Delta V <sub>elstat</sub> in the BB paper) |                     |            |           |            |
| Total Steric Interaction:                                                  | 19.978537754123302  | 543.6437   | 12536.72  | 52453.64   |
| (Total Steric Interaction =<br>Delta E <sup>0</sup> in the BB paper)       |                     |            |           |            |
| Orbital Interactions                                                       |                     |            |           |            |
| A:                                                                         | -26.823596068781040 | -729.9072  | -16832.06 | -70425.34  |
| Total Orbital Interactions:                                                | -26.823596068779221 | -729.9072  | -16832.06 | -70425.34  |
| Alternative Decomposition Orb.Int.                                         |                     |            |           |            |
| Kinetic:                                                                   | -63.178436082674018 | -1719.1727 | -39645.07 | -165874.96 |
| Coulomb:                                                                   | 33.952841012689284  | 923.9038   | 21305.73  | 89143.17   |
| XC:                                                                        | 2.401999001205529   | 65.3617    | 1507.28   | 6306.45    |
| Total Orbital Interactions:                                                | -26.823596068779207 | -729.9072  | -16832.06 | -70425.34  |
| Residu (E=Steric+OrbInt+Res):                                              | -0.000000536638935  | 0.0000     | 0.00      | 0.00       |
| Dispersion Energy:                                                         | -0.055152974512969  | -1.5008    | -34.61    | -144.80    |
| Total Bonding Energy:                                                      | -6.900211825807824  | -187.7643  | -4329.95  | -18116.50  |

Summary of Bonding Energy (energy terms are taken from the energy decomposition above)

|                                 |                    |           |          |           |
|---------------------------------|--------------------|-----------|----------|-----------|
| Electrostatic Energy:           | -5.331659515663390 | -145.0818 | -3345.67 | -13998.27 |
| Kinetic Energy:                 | 7.975319513151938  | 217.0195  | 5004.59  | 20939.20  |
| Coulomb (Steric+OrbInt) Energy: | -3.167742457755622 | -86.1987  | -1987.79 | -8316.91  |
| XC Energy:                      | -6.320976391027768 | -172.0025 | -3966.47 | -16595.72 |
| Dispersion Energy:              | -0.055152974512969 | -1.5008   | -34.61   | -144.80   |
|                                 | -----              | -----     | -----    | -----     |
| Total Bonding Energy:           | -6.900211825807813 | -187.7643 | -4329.95 | -18116.50 |



## host-guest, Cl<sub>2</sub>, COSMO

G E O M E T R Y   U P D A T E   \*\*\* 13 \*\*\*

\*\*\* Using NEW gradient routines \*\*\*

Energy gradients wrt nuclear displacements

=====

| Atom | Cartesian (a.u./angstrom) |           |           |
|------|---------------------------|-----------|-----------|
|      | X                         | Y         | Z         |
| 1 H  | -0.000176                 | -0.000178 | 0.000185  |
| 2 C  | 0.000042                  | -0.000275 | 0.000414  |
| 3 C  | 0.000063                  | 0.000668  | 0.000026  |
| 4 H  | 0.000182                  | -0.000351 | -0.000180 |
| 5 H  | 0.000008                  | 0.000142  | 0.000031  |
| 6 C  | -0.000058                 | -0.000150 | 0.000294  |
| 7 C  | 0.000145                  | -0.000145 | -0.000066 |
| 8 H  | 0.000018                  | 0.000022  | -0.000045 |
| 9 H  | -0.000067                 | 0.000119  | 0.000106  |
| 10 C | 0.000119                  | -0.000050 | 0.000139  |
| 11 C | 0.000128                  | -0.000095 | 0.000011  |
| 12 H | 0.000069                  | 0.000025  | -0.000040 |
| 13 H | -0.000058                 | 0.000026  | 0.000006  |
| 14 C | -0.000064                 | -0.000034 | 0.000030  |
| 15 C | -0.000101                 | 0.000067  | 0.000016  |
| 16 H | 0.000027                  | -0.000014 | -0.000038 |
| 17 H | 0.000029                  | -0.000013 | -0.000014 |
| 18 C | -0.000017                 | -0.000060 | -0.000050 |
| 19 C | -0.000424                 | 0.000093  | -0.000115 |
| 20 H | 0.000448                  | 0.000021  | -0.000267 |
| 21 H | -0.000094                 | -0.000104 | -0.000033 |
| 22 C | -0.000117                 | -0.000068 | -0.000009 |
| 23 C | 0.000007                  | 0.000372  | 0.000049  |
| 24 H | 0.000068                  | -0.000070 | -0.000071 |
| 25 H | -0.000037                 | -0.000106 | -0.000004 |
| 26 C | 0.000091                  | 0.000033  | -0.000086 |
| 27 C | -0.000599                 | -0.000243 | -0.000037 |
| 28 H | 0.000315                  | 0.000036  | -0.000086 |
| 29 H | 0.000003                  | 0.000019  | 0.000109  |
| 30 O | 0.000112                  | -0.000208 | 0.000009  |
| 31 O | -0.000182                 | -0.000167 | 0.000050  |
| 32 O | -0.000092                 | 0.000078  | 0.000028  |
| 33 O | 0.000015                  | 0.000006  | 0.000110  |
| 34 O | -0.000052                 | 0.000366  | -0.000230 |
| 35 O | 0.000351                  | -0.000627 | 0.000425  |
| 36 O | -0.000251                 | 0.000279  | -0.000420 |
| 37 O | 0.000017                  | 0.000357  | -0.000346 |
| 38 O | 0.000072                  | 0.000351  | -0.000008 |
| 39 O | 0.000003                  | 0.000021  | -0.000107 |
| 40 O | -0.000003                 | -0.000056 | 0.000117  |
| 41 O | -0.000046                 | -0.000005 | -0.000150 |
| 42 O | 0.000001                  | -0.000065 | -0.000222 |
| 43 O | -0.000124                 | -0.000185 | 0.000526  |
| 44 N | -0.000121                 | 0.000068  | -0.000209 |
| 45 N | -0.000243                 | -0.000161 | -0.000146 |
| 46 N | -0.000076                 | -0.000581 | -0.000077 |
| 47 N | 0.000111                  | 0.000176  | -0.000097 |
| 48 N | -0.000153                 | 0.000294  | -0.000005 |
| 49 N | 0.000122                  | -0.000134 | -0.000106 |
| 50 N | 0.000018                  | 0.000020  | 0.000172  |
| 51 N | -0.000015                 | -0.000172 | 0.000103  |
| 52 N | -0.000023                 | 0.000049  | -0.000326 |
| 53 N | -0.000113                 | 0.000215  | -0.000197 |
| 54 N | -0.000048                 | 0.000210  | 0.000261  |
| 55 N | -0.000081                 | -0.000048 | -0.000142 |
| 56 N | 0.000103                  | -0.000562 | 0.000121  |
| 57 N | 0.000732                  | 0.000137  | -0.000004 |
| 58 N | 0.000181                  | -0.000180 | 0.000131  |
| 59 N | -0.000031                 | -0.000048 | -0.000181 |
| 60 N | -0.000048                 | 0.000340  | -0.000080 |
| 61 N | -0.000074                 | -0.000077 | -0.000039 |
| 62 N | 0.000055                  | 0.000077  | -0.000047 |
| 63 N | -0.000111                 | 0.000010  | -0.000053 |
| 64 N | -0.000116                 | 0.000076  | 0.000062  |
| 65 N | -0.000014                 | -0.000098 | -0.000020 |
| 66 N | 0.000076                  | 0.000064  | -0.000090 |
| 67 N | -0.000063                 | 0.000064  | -0.000093 |
| 68 N | 0.000147                  | -0.000173 | 0.000025  |
| 69 N | -0.000107                 | 0.000166  | 0.000207  |

|        |           |           |           |
|--------|-----------|-----------|-----------|
| 70 N   | 0.000115  | -0.000378 | -0.000466 |
| 71 N   | 0.000041  | 0.000488  | -0.000181 |
| 72 C   | 0.000112  | -0.000144 | -0.000052 |
| 73 C   | -0.000086 | 0.000160  | -0.000268 |
| 74 H   | -0.000040 | -0.000258 | 0.000111  |
| 75 H   | -0.000228 | -0.000160 | -0.000270 |
| 76 C   | -0.000322 | 0.000008  | 0.000050  |
| 77 C   | -0.000063 | -0.000332 | 0.000156  |
| 78 H   | -0.000120 | 0.000149  | -0.000024 |
| 79 H   | 0.000026  | 0.000009  | 0.000089  |
| 80 C   | -0.000002 | 0.000097  | 0.000099  |
| 81 C   | -0.000165 | 0.000032  | 0.000136  |
| 82 H   | -0.000148 | 0.000012  | 0.000067  |
| 83 H   | 0.000009  | 0.000002  | 0.000013  |
| 84 C   | 0.000028  | 0.000140  | -0.000219 |
| 85 C   | -0.000011 | 0.000167  | 0.000076  |
| 86 H   | -0.000070 | 0.000012  | 0.000028  |
| 87 H   | -0.000068 | 0.000036  | 0.000033  |
| 88 C   | -0.000086 | -0.000442 | 0.000389  |
| 89 C   | -0.000017 | -0.000215 | 0.000036  |
| 90 H   | 0.000018  | 0.000256  | -0.000110 |
| 91 H   | -0.000026 | 0.000207  | -0.000086 |
| 92 C   | -0.000238 | 0.000800  | -0.000586 |
| 93 C   | 0.000014  | 0.000494  | 0.000185  |
| 94 H   | 0.000128  | -0.000150 | -0.000034 |
| 95 H   | 0.000068  | -0.000043 | -0.000009 |
| 96 C   | 0.000167  | 0.000040  | 0.000180  |
| 97 C   | -0.000128 | -0.000481 | 0.000380  |
| 98 H   | 0.000168  | 0.000084  | -0.000172 |
| 99 H   | 0.000242  | -0.000010 | 0.000067  |
| 100 C  | -0.000174 | 0.000269  | -0.000059 |
| 101 H  | 0.000048  | 0.000025  | 0.000037  |
| 102 C  | 0.000222  | -0.000128 | 0.000140  |
| 103 H  | -0.000144 | -0.000030 | -0.000130 |
| 104 C  | 0.000142  | 0.000060  | 0.000205  |
| 105 H  | -0.000126 | -0.000065 | -0.000235 |
| 106 C  | 0.000057  | -0.000127 | -0.000323 |
| 107 H  | -0.000003 | 0.000154  | 0.000085  |
| 108 C  | 0.000015  | -0.000082 | -0.000126 |
| 109 H  | -0.000053 | 0.000033  | 0.000148  |
| 110 C  | -0.000142 | -0.000042 | 0.000313  |
| 111 H  | 0.000034  | -0.000013 | -0.000008 |
| 112 C  | -0.000087 | 0.000063  | 0.000188  |
| 113 H  | 0.000051  | 0.000000  | -0.000022 |
| 114 C  | -0.000033 | -0.000028 | -0.000122 |
| 115 H  | -0.000005 | 0.000013  | 0.000024  |
| 116 C  | -0.000021 | -0.000124 | -0.000089 |
| 117 H  | -0.000023 | 0.000018  | 0.000007  |
| 118 C  | 0.000028  | 0.000225  | 0.000248  |
| 119 H  | -0.000083 | -0.000102 | -0.000183 |
| 120 C  | 0.000139  | 0.000300  | 0.000146  |
| 121 H  | -0.000064 | -0.000078 | -0.000188 |
| 122 C  | -0.000029 | -0.000270 | -0.000272 |
| 123 H  | -0.000099 | 0.000130  | 0.000050  |
| 124 C  | 0.000034  | -0.000711 | -0.000260 |
| 125 H  | -0.000220 | 0.000188  | 0.000208  |
| 126 C  | 0.000278  | 0.000590  | 0.000071  |
| 127 H  | 0.000550  | -0.000394 | 0.000472  |
| 128 H  | 0.000072  | 0.000990  | 0.000349  |
| 129 H  | 0.000072  | 0.000061  | 0.000053  |
| 130 Ir | 0.000799  | 0.001639  | 0.000342  |
| 131 H  | 0.000018  | -0.000422 | -0.000047 |
| 132 C  | 0.000176  | 0.000037  | 0.000032  |
| 133 C  | -0.000094 | 0.000241  | -0.000242 |
| 134 C  | -0.000024 | -0.000078 | 0.000008  |
| 135 C  | -0.000005 | 0.000020  | 0.000442  |
| 136 C  | 0.000059  | -0.000290 | 0.000070  |
| 137 H  | 0.000115  | 0.000036  | 0.000066  |
| 138 H  | 0.000165  | -0.000109 | 0.000246  |
| 139 H  | 0.000038  | 0.000070  | -0.000261 |
| 140 H  | -0.000026 | -0.000178 | 0.000040  |
| 141 O  | 0.001729  | 0.000751  | -0.000071 |
| 142 H  | -0.001257 | -0.000050 | 0.000204  |
| 143 O  | -0.000586 | -0.000402 | 0.000025  |
| 144 H  | 0.000161  | -0.000169 | 0.000000  |
| 145 O  | -0.000191 | -0.001010 | -0.000282 |
| 146 H  | 0.000090  | 0.000675  | 0.000149  |
| 147 C  | -0.001289 | 0.000127  | -0.000659 |
| 148 H  | 0.000938  | -0.000116 | 0.000012  |
| 149 H  | 0.000183  | -0.000304 | 0.000074  |
| 150 C  | 0.000142  | 0.000165  | 0.000063  |
| 151 H  | 0.000019  | -0.000133 | -0.000040 |
| 152 H  | -0.000002 | 0.000057  | -0.000007 |
| 153 C  | -0.001133 | -0.000433 | 0.000760  |
| 154 H  | 0.000563  | 0.000249  | 0.000106  |

```

155 H    0.000214 -0.000216 -0.000112
156 C    0.000439 -0.001716 -0.000649
157 H   -0.000338  0.000067  0.000753
158 H   -0.000147  0.000186 -0.000118
159 C    0.000002 -0.000055 -0.000959
160 H   -0.000257 -0.000127  0.000389
161 H    0.000313  0.000277  0.000228
162 Cl  -0.000218  0.000166  0.000052
163 Cl  -0.000233 -0.000024 -0.000187
    
```

-----  
 Geometry Convergence Tests

Energy old : -37.24787769  
 new : -37.24795977

Convergence tests:  
 (Energies in hartree, Gradients in hartree/angstr or radian, Lengths in angstrom, Angles in degrees)

| Item             | Value       | Criterion  | Conv. | Ratio      |
|------------------|-------------|------------|-------|------------|
| change in energy | -0.00008208 | 0.00100000 | YES   | 0.05231289 |
| gradient max     | 0.00172938  | 0.01000000 | YES   | 0.20580535 |
| gradient rms     | 0.00028121  | 0.00666667 | YES   | 0.27911633 |
| cart. step max   | 0.00461067  | 0.01000000 | YES   | 0.98964599 |
| cart. step rms   | 0.00092816  | 0.00666667 | YES   | 0.72065266 |

prediction dE : -0.00003363

\*\*\*\*\*  
 Geometry CONVERGED  
 \*\*\*\*\*

|                                                                 | hartree              | eV          | kcal/mol   | kJ/mol      |
|-----------------------------------------------------------------|----------------------|-------------|------------|-------------|
| Pauli Repulsion                                                 |                      |             |            |             |
| Kinetic (Delta T^0):                                            | 468.082554333671453  | 12737.1744  | 293726.27  | 1228950.57  |
| Delta V^Pauli Coulomb:                                          | -244.056742412101670 | -6641.1219  | -153147.93 | -640770.89  |
| Delta V^Pauli LDA-XC:                                           | -57.399114758354919  | -1561.9094  | -36018.49  | -150701.35  |
| Delta V^Pauli GGA-Exchange:                                     | 3.629061729394522    | 98.7518     | 2277.27    | 9528.10     |
| Delta V^Pauli GGA-Correlation:                                  | -4.182095250307558   | -113.8006   | -2624.30   | -10980.09   |
| Total Pauli Repulsion:                                          | 166.073663642301824  | 4519.0943   | 104212.81  | 436026.34   |
| (Total Pauli Repulsion =<br>Delta E^Pauli in BB paper)          |                      |             |            |             |
| Steric Interaction                                              |                      |             |            |             |
| Pauli Repulsion (Delta E^Pauli):                                | 166.073663642301824  | 4519.0943   | 104212.81  | 436026.34   |
| Electrostatic Interaction:                                      | -36.312463403259670  | -988.1124   | -22786.42  | -95338.36   |
| (Electrostatic Interaction =<br>Delta V_elstat in the BB paper) |                      |             |            |             |
| Total Steric Interaction:                                       | 129.761200239042154  | 3530.9819   | 81426.39   | 340687.98   |
| (Total Steric Interaction =<br>Delta E^0 in the BB paper)       |                      |             |            |             |
| Orbital Interactions                                            |                      |             |            |             |
| A:                                                              | -166.228842670734508 | -4523.3170  | -104310.18 | -436433.76  |
| Total Orbital Interactions:                                     | -166.283171034974629 | -4524.7953  | -104344.28 | -436576.40  |
| Alternative Decomposition Orb.Int.                              |                      |             |            |             |
| Kinetic:                                                        | -430.243364345855412 | -11707.5176 | -269981.82 | -1129603.79 |
| Coulomb:                                                        | 241.535455694499632  | 6572.5142   | 151565.80  | 634151.25   |
| XC:                                                             | 22.424737616381194   | 610.2082    | 14071.74   | 58876.14    |
| Total Orbital Interactions:                                     | -166.283171034974600 | -4524.7953  | -104344.28 | -436576.40  |
| Residu (E=Steric+OrbInt+Res):                                   | -0.000314053712023   | -0.0085     | -0.20      | -0.82       |
| Solvation Energy (el):                                          | -0.270589402249712   | -7.3631     | -169.80    | -710.43     |
| Dispersion Energy:                                              | -0.455108907349421   | -12.3841    | -285.59    | -1194.89    |
| Post-SCF Solvation Energies                                     |                      |             |            |             |
| Solvation Energy (cd):                                          | 0.000000000000000    | 0.0000      | 0.00       | 0.00        |
| Total Bonding Energy:                                           | -37.247983159243631  | -1013.5692  | -23373.46  | -97794.57   |

Summary of Bonding Energy (energy terms are taken from the energy decomposition above)

|                                 |                     |            |           |           |
|---------------------------------|---------------------|------------|-----------|-----------|
| Electrostatic Energy:           | -36.312463403259670 | -988.1124  | -22786.42 | -95338.36 |
| Kinetic Energy:                 | 37.839189987816042  | 1029.6567  | 23744.45  | 99346.78  |
| Coulomb (Steric+OrbInt) Energy: | -2.521600771314070  | -68.6162   | -1582.33  | -6620.46  |
| XC Energy:                      | -35.527410662886766 | -966.7500  | -22293.79 | -93277.20 |
| Solvation:                      | -0.270589402249712  | -7.3631    | -169.80   | -710.43   |
| Dispersion Energy:              | -0.455108907349421  | -12.3841   | -285.59   | -1194.89  |
| Total Bonding Energy:           | -37.247983159243596 | -1013.5692 | -23373.46 | -97794.57 |

Single point gas phase energy from COSMO geometry

|                                                                 | hartree              | eV          | kcal/mol   | kJ/mol      |
|-----------------------------------------------------------------|----------------------|-------------|------------|-------------|
| Pauli Repulsion                                                 |                      |             |            |             |
| Kinetic (Delta T^0):                                            | 468.081985133382716  | 12737.1589  | 293725.91  | 1228949.08  |
| Delta V^Pauli Coulomb:                                          | -244.056780659319600 | -6641.1229  | -153147.96 | -640770.99  |
| Delta V^Pauli LDA-XC:                                           | -57.398989932503824  | -1561.9060  | -36018.41  | -150701.03  |
| Delta V^Pauli GGA-Exchange:                                     | 3.629042293154953    | 98.7513     | 2277.26    | 9528.05     |
| Delta V^Pauli GGA-Correlation:                                  | -4.182079483084973   | -113.8002   | -2624.29   | -10980.05   |
| Total Pauli Repulsion:                                          | 166.073177351629283  | 4519.0811   | 104212.50  | 436025.07   |
| (Total Pauli Repulsion =<br>Delta E^Pauli in BB paper)          |                      |             |            |             |
| Steric Interaction                                              |                      |             |            |             |
| Pauli Repulsion (Delta E^Pauli):                                | 166.073177351629283  | 4519.0811   | 104212.50  | 436025.07   |
| Electrostatic Interaction:                                      | -36.312457433853830  | -988.1122   | -22786.41  | -95338.34   |
| (Electrostatic Interaction =<br>Delta V_elstat in the BB paper) |                      |             |            |             |
| Total Steric Interaction:                                       | 129.760719917775447  | 3530.9688   | 81426.09   | 340686.72   |
| (Total Steric Interaction =<br>Delta E^0 in the BB paper)       |                      |             |            |             |
| Orbital Interactions                                            |                      |             |            |             |
| A:                                                              | -166.341955184928224 | -4526.3949  | -104381.16 | -436730.74  |
| Total Orbital Interactions:                                     | -166.341955184931265 | -4526.3949  | -104381.16 | -436730.74  |
| Alternative Decomposition Orb.Int.                              |                      |             |            |             |
| Kinetic:                                                        | -430.238120440469970 | -11707.3749 | -269978.53 | -1129590.03 |
| Coulomb:                                                        | 241.397328797180222  | 6568.7555   | 151479.13  | 633788.60   |
| XC:                                                             | 22.498836458358575   | 612.2245    | 14118.23   | 59070.69    |
| Total Orbital Interactions:                                     | -166.341955184931180 | -4526.3949  | -104381.16 | -436730.74  |
| Residu (E=Steric+OrbInt+Res):                                   | -0.000339107095341   | -0.0092     | -0.21      | -0.89       |
| Dispersion Energy:                                              | -0.455108703660145   | -12.3841    | -285.59    | -1194.89    |
| Total Bonding Energy:                                           | -37.036683077911306  | -1007.8194  | -23240.87  | -97239.80   |

Summary of Bonding Energy (energy terms are taken from the energy decomposition above)

|                                 |                     |            |           |           |
|---------------------------------|---------------------|------------|-----------|-----------|
| Electrostatic Energy:           | -36.312457433853830 | -988.1122  | -22786.41 | -95338.34 |
| Kinetic Energy:                 | 37.843864692912746  | 1029.7840  | 23747.39  | 99359.05  |
| Coulomb (Steric+OrbInt) Energy: | -2.659790969234706  | -72.3766   | -1669.04  | -6983.28  |
| XC Energy:                      | -35.453190664075265 | -964.7304  | -22247.22 | -93082.34 |
| Dispersion Energy:              | -0.455108703660145  | -12.3841   | -285.59   | -1194.89  |
| Total Bonding Energy:           | -37.036683077911199 | -1007.8194 | -23240.87 | -97239.80 |

## Cp\*Ir(H<sub>2</sub>O)<sub>2</sub>(O)<sup>2+</sup>, gas phase

Triplet state  
 B-LYPD3

Geometry CYCLE 52  
 =====

Energy gradients wrt nuclear displacements  
 =====

| Atom | Cartesian (a.u./angstrom) |           |           |
|------|---------------------------|-----------|-----------|
|      | X                         | Y         | Z         |
| 1 H  | 0.000010                  | -0.000015 | -0.000021 |
| 2 H  | 0.000017                  | -0.000071 | -0.000016 |
| 3 H  | -0.000576                 | -0.000607 | 0.000395  |
| 4 Ir | 0.000340                  | -0.000796 | -0.000878 |
| 5 H  | 0.000463                  | -0.000576 | -0.000569 |
| 6 C  | -0.000187                 | -0.000327 | 0.000501  |
| 7 C  | -0.000063                 | -0.000204 | 0.000180  |
| 8 C  | -0.000483                 | -0.000132 | 0.000033  |
| 9 C  | 0.000030                  | 0.000395  | -0.000303 |
| 10 C | -0.000086                 | 0.000120  | 0.000024  |
| 11 H | -0.000019                 | -0.000004 | 0.000096  |
| 12 H | 0.000001                  | 0.000131  | -0.000041 |
| 13 H | -0.000011                 | -0.000003 | -0.000019 |
| 14 H | 0.000008                  | 0.000041  | -0.000016 |
| 15 O | -0.000090                 | 0.000461  | 0.000961  |
| 16 H | -0.000160                 | 0.000446  | -0.000203 |
| 17 O | 0.000199                  | 0.000537  | 0.000379  |
| 18 H | 0.000490                  | -0.000086 | -0.000792 |
| 19 O | -0.000474                 | 0.000414  | 0.000376  |
| 20 H | 0.000091                  | -0.000055 | -0.000004 |
| 21 C | -0.000062                 | 0.000163  | -0.000006 |
| 22 H | 0.000028                  | 0.000022  | -0.000007 |
| 23 H | 0.000033                  | -0.000032 | -0.000010 |
| 24 C | 0.000050                  | 0.000093  | -0.000068 |
| 25 H | 0.000011                  | 0.000005  | -0.000031 |
| 26 H | 0.000053                  | 0.000015  | 0.000024  |
| 27 C | 0.000099                  | -0.000048 | 0.000087  |
| 28 H | 0.000049                  | -0.000009 | -0.000012 |
| 29 H | 0.000032                  | 0.000011  | -0.000016 |
| 30 C | 0.000086                  | -0.000050 | -0.000024 |
| 31 H | 0.000018                  | 0.000006  | 0.000051  |
| 32 H | 0.000029                  | 0.000028  | -0.000024 |
| 33 C | 0.000073                  | 0.000127  | -0.000044 |

dE(predicted): -0.83979E-05, dE(actual): -0.20916E-04, Trust radius: 0.132000, all in a.u.

-----  
 Geometry Convergence after Step 52 \*\* CONVERGED \*\*  
 -----

|                          |                     |            |   |
|--------------------------|---------------------|------------|---|
| current energy           | -5.94056548 Hartree |            |   |
| energy change            | -0.00002092         | 0.00100000 | T |
| constrained gradient max | 0.00096131          | 0.00100000 | T |
| constrained gradient rms | 0.00027890          | 0.00066667 | T |
| gradient max             | 0.00096131          |            |   |
| gradient rms             | 0.00027890          |            |   |
| cart. step max           | 0.00520825          | 0.01000000 | T |
| cart. step rms           | 0.00176331          | 0.00666667 | T |

S\*\*2 value \*\*\* see also R. Buló et al., J.Am.Chem.Soc., 124 (2002) 13903-13910, note (29) \*\*\*

|                      | exact   | expectation value |
|----------------------|---------|-------------------|
| Total S2 (S squared) | 2.00000 | 2.01455           |

|                                | hartree             | eV        | kcal/mol  | KJ/mol    |
|--------------------------------|---------------------|-----------|-----------|-----------|
|                                | -----               | -----     | -----     | -----     |
| Pauli Repulsion                |                     |           |           |           |
| Kinetic (Delta T^0):           | 66.548694625290011  | 1810.8821 | 41759.94  | 174723.57 |
| Delta V^Pauli Coulomb:         | -34.598297926051785 | -941.4676 | -21710.76 | -90837.82 |
| Delta V^Pauli LDA-XC:          | -8.050746212002835  | -219.0720 | -5051.92  | -21137.23 |
| Delta V^Pauli GGA-Exchange:    | 0.534462698774508   | 14.5435   | 335.38    | 1403.23   |
| Delta V^Pauli GGA-Correlation: | -0.617431171965225  | -16.8012  | -387.44   | -1621.07  |
| Total Pauli Repulsion:         | 23.816682014044673  | 648.0849  | 14945.20  | 62530.69  |

|                                                                 |                     |            |           |            |
|-----------------------------------------------------------------|---------------------|------------|-----------|------------|
| (Total Pauli Repulsion =<br>Delta E^Pauli in BB paper)          |                     |            |           |            |
| Steric Interaction                                              |                     |            |           |            |
| Pauli Repulsion (Delta E^Pauli):                                | 23.816682014044673  | 648.0849   | 14945.20  | 62530.69   |
| Electrostatic Interaction:                                      | -5.001860003736566  | -136.1075  | -3138.71  | -13132.38  |
| (Electrostatic Interaction =<br>Delta V_elstat in the BB paper) |                     |            |           |            |
| Total Steric Interaction:                                       | 18.814822010308106  | 511.9774   | 11806.48  | 49398.31   |
| (Total Steric Interaction =<br>Delta E^0 in the BB paper)       |                     |            |           |            |
| Orbital Interactions                                            |                     |            |           |            |
| A:                                                              | -24.704339070335038 | -672.2393  | -15502.21 | -64861.23  |
| Total Orbital Interactions:                                     | -24.709674365597007 | -672.3845  | -15505.56 | -64875.24  |
| Alternative Decomposition Orb.Int.                              |                     |            |           |            |
| Kinetic:                                                        | -59.920662551624687 | -1630.5242 | -37600.79 | -157321.68 |
| Coulomb:                                                        | 32.384261543440722  | 881.2206   | 20321.43  | 85024.87   |
| XC:                                                             | 2.826726642586958   | 76.9191    | 1773.80   | 7421.57    |
| Total Orbital Interactions:                                     | -24.709674365597007 | -672.3845  | -15505.56 | -64875.24  |
| Residu (E=Steric+OrbInt+Res):                                   | 0.000005771956325   | 0.0002     | 0.00      | 0.02       |
| Dispersion Energy:                                              | -0.045718885363717  | -1.2441    | -28.69    | -120.03    |
| Total Bonding Energy:                                           | -5.940565468696292  | -161.6510  | -3727.76  | -15596.95  |

Summary of Bonding Energy (energy terms are taken from the energy decomposition above)

|                                 |                    |           |          |           |
|---------------------------------|--------------------|-----------|----------|-----------|
| Electrostatic Energy:           | -5.001860003736566 | -136.1075 | -3138.71 | -13132.38 |
| Kinetic Energy:                 | 6.628032073665324  | 180.3579  | 4159.15  | 17401.90  |
| Coulomb (Steric+OrbInt) Energy: | -2.214030610654738 | -60.2468  | -1389.33 | -5812.94  |
| XC Energy:                      | -5.306988042606593 | -144.4105 | -3330.19 | -13933.50 |
| Dispersion Energy:              | -0.045718885363717 | -1.2441   | -28.69   | -120.03   |
| Total Bonding Energy:           | -5.940565468696291 | -161.6510 | -3727.76 | -15596.95 |

Single point PBE0:

S\*\*2 value \*\*\* see also R. Bulo et al., J.Am.Chem.Soc., 124 (2002) 13903-13910, note (29) \*\*\*

|                                                                 | exact               | expectation value |           |            |
|-----------------------------------------------------------------|---------------------|-------------------|-----------|------------|
| Total S2 (S squared)                                            | 2.00000             | 2.04052           |           |            |
|                                                                 | hartree             | eV                | kcal/mol  | kJ/mol     |
|                                                                 | -----               | -----             | -----     | -----      |
| Pauli Repulsion                                                 |                     |                   |           |            |
| Kinetic (Delta T^0):                                            | 65.421461138622931  | 1780.2085         | 41052.59  | 171764.02  |
| Delta V^Pauli Coulomb:                                          | -33.675898858718590 | -916.3678         | -21131.95 | -88416.06  |
| Delta V^Pauli Hybrid-X:                                         | -5.656148085247537  | -153.9116         | -3549.29  | -14850.21  |
| Delta V^Pauli Hybrid-C:                                         | -0.639512349311500  | -17.4020          | -401.30   | -1679.04   |
| Delta V^Pauli HF-Exchange:                                      | -1.390342301180027  | -37.8331          | -872.45   | -3650.34   |
| Total Pauli Repulsion:                                          | 24.059559544165282  | 654.6939          | 15097.60  | 63168.36   |
| (Total Pauli Repulsion =<br>Delta E^Pauli in BB paper)          |                     |                   |           |            |
| Steric Interaction                                              |                     |                   |           |            |
| Pauli Repulsion (Delta E^Pauli):                                | 24.059559544165282  | 654.6939          | 15097.60  | 63168.36   |
| Electrostatic Interaction:                                      | -5.105234943616575  | -138.9205         | -3203.58  | -13403.79  |
| (Electrostatic Interaction =<br>Delta V_elstat in the BB paper) |                     |                   |           |            |
| Total Steric Interaction:                                       | 18.954324600548706  | 515.7734          | 11894.02  | 49764.57   |
| (Total Steric Interaction =<br>Delta E^0 in the BB paper)       |                     |                   |           |            |
| Orbital Interactions                                            |                     |                   |           |            |
| A:                                                              | -26.748168455706359 | -727.8547         | -16784.73 | -70227.31  |
| Total Orbital Interactions:                                     | -26.748168455705848 | -727.8547         | -16784.73 | -70227.31  |
| Alternative Decomposition Orb.Int.                              |                     |                   |           |            |
| Kinetic:                                                        | -58.297879557903251 | -1586.3660        | -36582.48 | -153061.06 |

|                               |                     |           |           |           |
|-------------------------------|---------------------|-----------|-----------|-----------|
| Coulomb:                      | 31.330125356180851  | 852.5361  | 19659.95  | 82257.23  |
| XC:                           | 0.219585746016543   | 5.9752    | 137.79    | 576.52    |
|                               | -----               | -----     | -----     | -----     |
| Total Orbital Interactions:   | -26.748168455705859 | -727.8547 | -16784.73 | -70227.31 |
| Residu (E=Steric+OrbInt+Res): | 0.000032534927562   | 0.0009    | 0.02      | 0.09      |
| Total Bonding Energy:         | -7.793811320229580  | -212.0804 | -4890.69  | -20462.65 |

Summary of Bonding Energy (energy terms are taken from the energy decomposition above)

|                                 |                    |           |          |           |
|---------------------------------|--------------------|-----------|----------|-----------|
| Electrostatic Energy:           | -5.105234943616575 | -138.9205 | -3203.58 | -13403.79 |
| Kinetic Energy:                 | 7.123581580719680  | 193.8425  | 4470.12  | 18702.96  |
| Coulomb (Steric+OrbInt) Energy: | -2.345740967610176 | -63.8309  | -1471.97 | -6158.74  |
| XC Energy:                      | -7.466416989722521 | -203.1715 | -4685.25 | -19603.08 |
|                                 | -----              | -----     | -----    | -----     |
| Total Bonding Energy:           | -7.793811320229592 | -212.0804 | -4890.69 | -20462.65 |

## Cp\*Ir(H<sub>2</sub>O)<sub>2</sub>(O)<sup>2+</sup>, gas phase

Singlet state (Broken symmetry)  
 B-LYPD3

S\*\*2 value \*\*\* see also R. Bulo et al., J.Am.Chem.Soc., 124 (2002) 13903-13910, note (29) \*\*\*

|                                                                                               | exact               | expectation value |                      |                    |
|-----------------------------------------------------------------------------------------------|---------------------|-------------------|----------------------|--------------------|
| Total S2 (S squared)                                                                          | 0.00000             | 0.99489           |                      |                    |
|                                                                                               | ----- hartree ----- | ----- eV -----    | ----- kcal/mol ----- | ----- kJ/mol ----- |
| <b>Pauli Repulsion</b>                                                                        |                     |                   |                      |                    |
| Kinetic (Delta T^0):                                                                          | 66.548928020530980  | 1810.8885         | 41760.09             | 174724.19          |
| Delta V^Pauli Coulomb:                                                                        | -34.598509417435523 | -941.4733         | -21710.89            | -90838.37          |
| Delta V^Pauli LDA-XC:                                                                         | -8.050825153046002  | -219.0741         | -5051.97             | -21137.44          |
| Delta V^Pauli GGA-Exchange:                                                                   | 0.534462863536703   | 14.5435           | 335.38               | 1403.23            |
| Delta V^Pauli GGA-Correlation:                                                                | -0.617437065143322  | -16.8013          | -387.45              | -1621.08           |
| Total Pauli Repulsion:                                                                        | 23.816619248442837  | 648.0832          | 14945.16             | 62530.52           |
| (Total Pauli Repulsion =<br>Delta E^Pauli in BB paper)                                        |                     |                   |                      |                    |
| <b>Steric Interaction</b>                                                                     |                     |                   |                      |                    |
| Pauli Repulsion (Delta E^Pauli):                                                              | 23.816619248442837  | 648.0832          | 14945.16             | 62530.52           |
| Electrostatic Interaction:                                                                    | -5.001860003736567  | -136.1075         | -3138.71             | -13132.38          |
| (Electrostatic Interaction =<br>Delta V_elstat in the BB paper)                               |                     |                   |                      |                    |
| Total Steric Interaction:                                                                     | 18.814759244706270  | 511.9756          | 11806.44             | 49398.14           |
| (Total Steric Interaction =<br>Delta E^0 in the BB paper)                                     |                     |                   |                      |                    |
| <b>Orbital Interactions</b>                                                                   |                     |                   |                      |                    |
| A:                                                                                            | -24.699526871620392 | -672.1083         | -15499.19            | -64848.60          |
| Total Orbital Interactions:                                                                   | -24.699526871620701 | -672.1083         | -15499.19            | -64848.60          |
| <b>Alternative Decomposition Orb.Int.</b>                                                     |                     |                   |                      |                    |
| Kinetic:                                                                                      | -59.940222670307087 | -1631.0564        | -37613.06            | -157373.03         |
| Coulomb:                                                                                      | 32.397748123490118  | 881.5876          | 20329.90             | 85060.28           |
| XC:                                                                                           | 2.842947675196254   | 77.3605           | 1783.98              | 7464.16            |
| Total Orbital Interactions:                                                                   | -24.699526871620716 | -672.1083         | -15499.19            | -64848.60          |
| Residu (E=Steric+OrbInt+Res):                                                                 | 0.000004537328184   | 0.0001            | 0.00                 | 0.01               |
| Dispersion Energy:                                                                            | -0.045718885363717  | -1.2441           | -28.69               | -120.03            |
| Total Bonding Energy:                                                                         | -5.930481974949965  | -161.3766         | -3721.43             | -15570.48          |
| <b>Summary of Bonding Energy (energy terms are taken from the energy decomposition above)</b> |                     |                   |                      |                    |
| Electrostatic Energy:                                                                         | -5.001860003736567  | -136.1075         | -3138.71             | -13132.38          |
| Kinetic Energy:                                                                               | 6.608705350223889   | 179.8320          | 4147.03              | 17351.15           |
| Coulomb (Steric+OrbInt) Energy:                                                               | -2.200756756617224  | -59.8856          | -1381.00             | -5778.09           |
| XC Energy:                                                                                    | -5.290851679456368  | -143.9714         | -3320.06             | -13891.13          |
| Dispersion Energy:                                                                            | -0.045718885363717  | -1.2441           | -28.69               | -120.03            |
| Total Bonding Energy:                                                                         | -5.930481974949986  | -161.3766         | -3721.43             | -15570.48          |

--PBE0 broken symmetry--

S\*\*2 value \*\*\* see also R. Bulo et al., J.Am.Chem.Soc., 124 (2002) 13903-13910, note (29) \*\*\*

|                        | exact               | expectation value |                      |                    |
|------------------------|---------------------|-------------------|----------------------|--------------------|
| Total S2 (S squared)   | 0.00000             | 1.00258           |                      |                    |
|                        | ----- hartree ----- | ----- eV -----    | ----- kcal/mol ----- | ----- kJ/mol ----- |
| <b>Pauli Repulsion</b> |                     |                   |                      |                    |
| Kinetic (Delta T^0):   | 65.421461138622931  | 1780.2085         | 41052.59             | 171764.02          |
| Delta V^Pauli Coulomb: | -33.675898858776549 | -916.3678         | -21131.95            | -88416.06          |



|                                                                                        |                     |            |           |            |
|----------------------------------------------------------------------------------------|---------------------|------------|-----------|------------|
| Delta V <sup>Pauli</sup> Hybrid-X:                                                     | -5.656148085247537  | -153.9116  | -3549.29  | -14850.21  |
| Delta V <sup>Pauli</sup> Hybrid-C:                                                     | -0.639512349311500  | -17.4020   | -401.30   | -1679.04   |
| Delta V <sup>Pauli</sup> HF-Exchange:                                                  | -1.390342301180027  | -37.8331   | -872.45   | -3650.34   |
| -----                                                                                  |                     |            |           |            |
| Total Pauli Repulsion:                                                                 | 24.059559544107319  | 654.6939   | 15097.60  | 63168.36   |
| (Total Pauli Repulsion =<br>Delta E <sup>Pauli</sup> in BB paper)                      |                     |            |           |            |
| Steric Interaction                                                                     |                     |            |           |            |
| Pauli Repulsion (Delta E <sup>Pauli</sup> ):                                           | 24.059559544107319  | 654.6939   | 15097.60  | 63168.36   |
| Electrostatic Interaction:                                                             | -5.105234943616575  | -138.9205  | -3203.58  | -13403.79  |
| (Electrostatic Interaction =<br>Delta V <sub>elstat</sub> in the BB paper)             |                     |            |           |            |
| -----                                                                                  |                     |            |           |            |
| Total Steric Interaction:                                                              | 18.954324600490743  | 515.7734   | 11894.02  | 49764.57   |
| (Total Steric Interaction =<br>Delta E <sup>0</sup> in the BB paper)                   |                     |            |           |            |
| Orbital Interactions                                                                   |                     |            |           |            |
| A:                                                                                     | -26.734752650718313 | -727.4896  | -16776.31 | -70192.08  |
| -----                                                                                  |                     |            |           |            |
| Total Orbital Interactions:                                                            | -26.734752650717933 | -727.4896  | -16776.31 | -70192.08  |
| Alternative Decomposition Orb.Int.                                                     |                     |            |           |            |
| Kinetic:                                                                               | -58.320782934464020 | -1586.9893 | -36596.85 | -153121.19 |
| Coulomb:                                                                               | 31.346907485699802  | 852.9928   | 19670.48  | 82301.29   |
| XC:                                                                                    | 0.239122798046278   | 6.5069     | 150.05    | 627.82     |
| -----                                                                                  |                     |            |           |            |
| Total Orbital Interactions:                                                            | -26.734752650717940 | -727.4896  | -16776.31 | -70192.08  |
| Residu (E=Steric+OrbInt+Res):                                                          | 0.000034830640532   | 0.0009     | 0.02      | 0.09       |
| Total Bonding Energy:                                                                  | -7.780393219586658  | -211.7153  | -4882.27  | -20427.42  |
| Summary of Bonding Energy (energy terms are taken from the energy decomposition above) |                     |            |           |            |
| =====                                                                                  |                     |            |           |            |
| Electrostatic Energy:                                                                  | -5.105234943616575  | -138.9205  | -3203.58  | -13403.79  |
| Kinetic Energy:                                                                        | 7.100678204158910   | 193.2193   | 4455.74   | 18642.83   |
| Coulomb (Steric+OrbInt) Energy:                                                        | -2.328956542436213  | -63.3741   | -1461.44  | -6114.67   |
| XC Energy:                                                                             | -7.446879937692786  | -202.6399  | -4672.99  | -19551.78  |
| -----                                                                                  |                     |            |           |            |
| Total Bonding Energy:                                                                  | -7.780393219586664  | -211.7153  | -4882.27  | -20427.42  |

## host-guest Cp\*Ir(H<sub>2</sub>O)<sub>2</sub>(O)<sup>2+</sup>, gas phase

triplet  
B-LYPD3

Geometry CYCLE 59  
=====

Energy gradients wrt nuclear displacements  
=====

| Atom | Cartesian (a.u./angstrom) |           |           |
|------|---------------------------|-----------|-----------|
|      | X                         | Y         | Z         |
| 1 H  | -0.000012                 | 0.000043  | -0.000010 |
| 2 C  | -0.000070                 | -0.000071 | 0.000072  |
| 3 C  | 0.000051                  | -0.000081 | -0.000093 |
| 4 H  | 0.000011                  | 0.000029  | -0.000022 |
| 5 H  | -0.000020                 | 0.000026  | 0.000031  |
| 6 C  | 0.000009                  | -0.000026 | 0.000041  |
| 7 C  | -0.000073                 | -0.000065 | 0.000008  |
| 8 H  | 0.000009                  | -0.000012 | -0.000018 |
| 9 H  | -0.000030                 | -0.000018 | -0.000001 |
| 10 C | -0.000322                 | 0.000190  | 0.000258  |
| 11 C | 0.000005                  | -0.000126 | 0.000012  |
| 12 H | 0.000043                  | 0.000053  | -0.000015 |
| 13 H | 0.000032                  | -0.000005 | -0.000020 |
| 14 C | -0.000072                 | -0.000139 | 0.000097  |
| 15 C | -0.000022                 | 0.000176  | 0.000102  |
| 16 H | 0.000017                  | -0.000003 | 0.000011  |
| 17 H | 0.000021                  | 0.000058  | -0.000055 |
| 18 C | 0.000022                  | -0.000235 | 0.000126  |
| 19 C | -0.000010                 | -0.000144 | -0.000029 |
| 20 H | 0.000012                  | -0.000023 | 0.000029  |
| 21 H | 0.000026                  | 0.000064  | 0.000015  |
| 22 C | 0.000129                  | -0.000223 | 0.000002  |
| 23 C | 0.000091                  | -0.000063 | -0.000020 |
| 24 H | -0.000009                 | 0.000018  | 0.000000  |
| 25 H | -0.000030                 | -0.000002 | 0.000008  |
| 26 C | -0.000342                 | 0.000224  | -0.000099 |
| 27 C | -0.000083                 | 0.000039  | -0.000041 |
| 28 H | -0.000006                 | -0.000001 | -0.000007 |
| 29 H | -0.000022                 | -0.000011 | 0.000016  |
| 30 O | -0.000122                 | 0.000090  | -0.000047 |
| 31 O | -0.000148                 | -0.000275 | -0.000543 |
| 32 O | -0.000181                 | 0.000224  | -0.000032 |
| 33 O | -0.000056                 | -0.000023 | 0.000033  |
| 34 O | 0.000046                  | 0.000004  | -0.000087 |
| 35 O | 0.000035                  | 0.000055  | -0.000082 |
| 36 O | 0.000461                  | -0.000056 | -0.000050 |
| 37 O | -0.000031                 | 0.000023  | -0.000023 |
| 38 O | -0.000054                 | -0.000058 | 0.000016  |
| 39 O | 0.000322                  | -0.000571 | -0.000255 |
| 40 O | 0.000079                  | -0.000187 | -0.000084 |
| 41 O | -0.000087                 | 0.000114  | -0.000066 |
| 42 O | -0.000133                 | 0.000180  | 0.000004  |
| 43 O | 0.000163                  | -0.000114 | 0.000073  |
| 44 N | 0.000023                  | -0.000083 | 0.000004  |
| 45 N | -0.000169                 | 0.000017  | -0.000006 |
| 46 N | -0.000010                 | 0.000130  | -0.000049 |
| 47 N | -0.000054                 | -0.000080 | 0.000020  |
| 48 N | -0.000073                 | 0.000090  | 0.000040  |
| 49 N | 0.000037                  | 0.000047  | -0.000062 |
| 50 N | 0.000011                  | 0.000015  | 0.000027  |
| 51 N | -0.000074                 | 0.000095  | -0.000040 |
| 52 N | 0.000005                  | -0.000112 | -0.000083 |
| 53 N | 0.000059                  | -0.000196 | 0.000071  |
| 54 N | 0.000122                  | 0.000272  | 0.000128  |
| 55 N | -0.000104                 | -0.000095 | 0.000028  |
| 56 N | 0.000030                  | -0.000052 | -0.000015 |
| 57 N | 0.000027                  | -0.000014 | 0.000002  |
| 58 N | 0.000062                  | -0.000021 | -0.000076 |
| 59 N | 0.000059                  | 0.000043  | 0.000053  |
| 60 N | -0.000052                 | 0.000038  | -0.000092 |
| 61 N | -0.000004                 | -0.000139 | -0.000247 |
| 62 N | -0.000012                 | 0.000051  | 0.000083  |
| 63 N | 0.000065                  | -0.000009 | -0.000094 |
| 64 N | -0.000026                 | -0.000032 | -0.000032 |
| 65 N | -0.000029                 | 0.000066  | 0.000156  |
| 66 N | -0.000027                 | 0.000431  | -0.000010 |
| 67 N | 0.000042                  | 0.000177  | 0.000076  |
| 68 N | -0.000109                 | 0.000112  | 0.000027  |
| 69 N | 0.000048                  | -0.000152 | -0.000108 |
| 70 N | 0.000056                  | 0.000075  | 0.000066  |

|        |           |           |           |
|--------|-----------|-----------|-----------|
| 71 N   | 0.000259  | -0.000143 | 0.000061  |
| 72 C   | -0.000077 | -0.000027 | 0.000069  |
| 73 C   | 0.000002  | 0.000077  | -0.000026 |
| 74 H   | 0.000007  | -0.000021 | -0.000022 |
| 75 H   | -0.000024 | 0.000003  | -0.000037 |
| 76 C   | -0.000023 | -0.000369 | -0.000006 |
| 77 C   | -0.000014 | 0.000073  | -0.000003 |
| 78 H   | -0.000004 | 0.000023  | 0.000008  |
| 79 H   | -0.000023 | 0.000070  | -0.000016 |
| 80 C   | 0.000522  | -0.000561 | -0.000096 |
| 81 C   | -0.000115 | 0.000010  | -0.000003 |
| 82 H   | -0.000020 | -0.000004 | -0.000012 |
| 83 H   | -0.000030 | 0.000002  | 0.000010  |
| 84 C   | 0.000117  | 0.000018  | -0.000066 |
| 85 C   | 0.000025  | 0.000043  | -0.000041 |
| 86 H   | -0.000025 | -0.000004 | -0.000009 |
| 87 H   | 0.000056  | -0.000014 | 0.000061  |
| 88 C   | -0.000133 | 0.000075  | 0.000186  |
| 89 C   | -0.000035 | -0.000044 | -0.000033 |
| 90 H   | -0.000020 | -0.000011 | -0.000008 |
| 91 H   | 0.000002  | -0.000002 | 0.000006  |
| 92 C   | -0.000046 | 0.000002  | 0.000176  |
| 93 C   | 0.000044  | 0.000167  | 0.000020  |
| 94 H   | 0.000018  | -0.000056 | 0.000038  |
| 95 H   | 0.000045  | -0.000037 | -0.000021 |
| 96 C   | -0.000276 | -0.000060 | -0.000081 |
| 97 C   | 0.000075  | 0.000041  | -0.000046 |
| 98 H   | -0.000021 | 0.000006  | 0.000001  |
| 99 H   | -0.000013 | -0.000006 | -0.000019 |
| 100 C  | -0.000073 | 0.000036  | 0.000060  |
| 101 H  | -0.000018 | 0.000006  | 0.000025  |
| 102 C  | 0.000110  | -0.000110 | -0.000008 |
| 103 H  | -0.000004 | 0.000009  | -0.000016 |
| 104 C  | -0.000042 | 0.000003  | 0.000080  |
| 105 H  | -0.000003 | 0.000063  | 0.000010  |
| 106 C  | 0.000022  | 0.000035  | 0.000064  |
| 107 H  | 0.000077  | 0.000039  | 0.000027  |
| 108 C  | -0.000057 | 0.000037  | -0.000056 |
| 109 H  | 0.000041  | -0.000011 | 0.000012  |
| 110 C  | 0.000003  | 0.000010  | 0.000032  |
| 111 H  | 0.000005  | -0.000035 | 0.000027  |
| 112 C  | 0.000038  | 0.000027  | 0.000004  |
| 113 H  | 0.000011  | -0.000019 | 0.000017  |
| 114 C  | 0.000058  | 0.000044  | -0.000117 |
| 115 H  | 0.000011  | -0.000019 | 0.000005  |
| 116 C  | -0.000135 | 0.000132  | -0.000044 |
| 117 H  | -0.000006 | 0.000007  | -0.000005 |
| 118 C  | 0.000091  | -0.000009 | -0.000213 |
| 119 H  | 0.000027  | -0.000007 | 0.000071  |
| 120 C  | 0.000114  | -0.000048 | -0.000093 |
| 121 H  | -0.000010 | -0.000049 | 0.000005  |
| 122 C  | -0.000017 | 0.000079  | 0.000107  |
| 123 H  | 0.000002  | -0.000052 | 0.000007  |
| 124 C  | -0.000054 | -0.000044 | -0.000072 |
| 125 H  | 0.000002  | 0.000007  | 0.000034  |
| 126 C  | -0.000014 | -0.000010 | -0.000007 |
| 127 H  | -0.000035 | -0.000041 | -0.000011 |
| 128 H  | 0.000009  | 0.000082  | -0.000036 |
| 129 H  | 0.000720  | 0.000467  | 0.000872  |
| 130 Ir | -0.000731 | -0.000377 | 0.000093  |
| 131 H  | -0.000176 | -0.000027 | -0.000371 |
| 132 C  | 0.000199  | 0.000210  | 0.000246  |
| 133 C  | -0.000115 | 0.000032  | 0.000289  |
| 134 C  | 0.000100  | 0.000406  | -0.000313 |
| 135 C  | 0.000170  | -0.000171 | 0.000095  |
| 136 C  | -0.000059 | -0.000146 | -0.000338 |
| 137 H  | -0.000059 | 0.000132  | 0.000064  |
| 138 H  | -0.000088 | 0.000085  | -0.000026 |
| 139 H  | -0.000051 | 0.000010  | 0.000002  |
| 140 H  | -0.000108 | -0.000090 | -0.000098 |
| 141 O  | 0.000420  | -0.000328 | 0.000020  |
| 142 H  | -0.000496 | 0.000112  | 0.000211  |
| 143 O  | -0.000198 | 0.000338  | -0.000035 |
| 144 H  | 0.000057  | -0.000148 | -0.000158 |
| 145 O  | 0.000196  | -0.000046 | -0.000050 |
| 146 H  | -0.000086 | 0.000080  | 0.000087  |
| 147 C  | 0.000044  | -0.000053 | 0.000030  |
| 148 H  | -0.000014 | 0.000000  | -0.000033 |
| 149 H  | 0.000034  | -0.000001 | -0.000022 |
| 150 C  | 0.000045  | 0.000076  | 0.000282  |
| 151 H  | 0.000054  | -0.000005 | -0.000005 |
| 152 H  | 0.000064  | -0.000049 | -0.000065 |
| 153 C  | 0.000043  | 0.000245  | -0.000066 |
| 154 H  | -0.000063 | 0.000005  | 0.000033  |
| 155 H  | 0.000066  | 0.000006  | 0.000070  |

```

156 C    0.000020  0.000037  0.000318
157 H   -0.000017  0.000000 -0.000051
158 H   -0.000069  0.000118  0.000040
159 C    0.000116 -0.000082 -0.000242
    
```

dE(predicted): -0.15947E-04, dE(actual): 0.11066E-03, Trust radius: 0.159000, all in a.u.  
 Residual max backtransformation error 0.1838E-02

-----  
 Geometry Convergence after Step 59 \*\* CONVERGED \*\*  
 -----

```

current energy          -36.05044253 Hartree
energy change          0.00011066      0.00100000      T
constrained gradient max 0.00087154      0.00100000      T
constrained gradient rms 0.00013514      0.00066667      T
gradient max           0.00087154
gradient rms           0.00013514
cart. step max         0.00594886      0.01000000      T
cart. step rms         0.00181381      0.00666667      T
    
```

S\*\*2 value \*\*\* see also R. Buló et al., J.Am.Chem.Soc., 124 (2002) 13903-13910, note (29) \*\*\*

```

                exact      expectation value
Total S2 (S squared)      2.00000      2.01342
    
```

|                                                                                        | hartree              | eV          | kcal/mol   | kJ/mol      |
|----------------------------------------------------------------------------------------|----------------------|-------------|------------|-------------|
| -----                                                                                  |                      |             |            |             |
| Pauli Repulsion                                                                        |                      |             |            |             |
| Kinetic (Delta T^0):                                                                   | 463.721449112626885  | 12618.5027  | 290989.63  | 1217500.49  |
| Delta V^Pauli Coulomb:                                                                 | -241.738750505443164 | -6578.0461  | -151693.37 | -634685.00  |
| Delta V^Pauli LDA-XC:                                                                  | -56.724622420931318  | -1543.5555  | -35595.24  | -148930.48  |
| Delta V^Pauli GGA-Exchange:                                                            | 3.564729044154916    | 97.0012     | 2236.90    | 9359.19     |
| Delta V^Pauli GGA-Correlation:                                                         | -4.119447655115756   | -112.0959   | -2584.99   | -10815.61   |
| -----                                                                                  |                      |             |            |             |
| Total Pauli Repulsion:                                                                 | 164.703357575291562  | 4481.8064   | 103352.93  | 432428.60   |
| (Total Pauli Repulsion =<br>Delta E^Pauli in BB paper)                                 |                      |             |            |             |
| Steric Interaction                                                                     |                      |             |            |             |
| Pauli Repulsion (Delta E^Pauli):                                                       | 164.703357575291562  | 4481.8064   | 103352.93  | 432428.60   |
| Electrostatic Interaction:                                                             | -36.044847607837021  | -980.8302   | -22618.49  | -94635.73   |
| (Electrostatic Interaction =<br>Delta V_elstat in the BB paper)                        |                      |             |            |             |
| -----                                                                                  |                      |             |            |             |
| Total Steric Interaction:                                                              | 128.658509967454535  | 3500.9762   | 80734.44   | 337792.87   |
| (Total Steric Interaction =<br>Delta E^0 in the BB paper)                              |                      |             |            |             |
| Orbital Interactions                                                                   |                      |             |            |             |
| A:                                                                                     | -164.230035140451093 | -4468.9266  | -103055.91 | -431185.90  |
| -----                                                                                  |                      |             |            |             |
| Total Orbital Interactions:                                                            | -164.277580641230799 | -4470.2204  | -103085.75 | -431310.73  |
| Alternative Decomposition Orb.Int.                                                     |                      |             |            |             |
| Kinetic:                                                                               | -426.920589576740781 | -11617.1003 | -267896.74 | -1120879.85 |
| Coulomb:                                                                               | 239.801113522116452  | 6525.3203   | 150477.49  | 629597.73   |
| XC:                                                                                    | 22.841895413393662   | 621.5596    | 14333.51   | 59971.39    |
| -----                                                                                  |                      |             |            |             |
| Total Orbital Interactions:                                                            | -164.277580641230657 | -4470.2204  | -103085.75 | -431310.73  |
| Residu (E=Steric+OrbInt+Res):                                                          | -0.000006663845606   | -0.0002     | 0.00       | -0.02       |
| Dispersion Energy:                                                                     | -0.431364817230081   | -11.7380    | -270.69    | -1132.55    |
| -----                                                                                  |                      |             |            |             |
| Total Bonding Energy:                                                                  | -36.050442154851950  | -980.9824   | -22622.00  | -94650.42   |
| Summary of Bonding Energy (energy terms are taken from the energy decomposition above) |                      |             |            |             |
| =====                                                                                  |                      |             |            |             |
| Electrostatic Energy:                                                                  | -36.044847607837021  | -980.8302   | -22618.49  | -94635.73   |
| Kinetic Energy:                                                                        | 36.800859535886104   | 1001.4023   | 23092.89   | 96620.64    |
| Coulomb (Steric+OrbInt) Energy:                                                        | -1.937643647172308   | -52.7260    | -1215.89   | -5087.28    |
| XC Energy:                                                                             | -34.437445618498501  | -937.0906   | -21609.83  | -90415.50   |
| Dispersion Energy:                                                                     | -0.431364817230081   | -11.7380    | -270.69    | -1132.55    |
| -----                                                                                  |                      |             |            |             |
| Total Bonding Energy:                                                                  | -36.050442154851808  | -980.9824   | -22622.00  | -94650.42   |



## host-guest Cp\*Ir(H<sub>2</sub>O)<sub>2</sub>(O)<sup>2+</sup>, gas phase

Broken symmetry singlet  
 B-LYPD3

S\*\*2 value \*\*\* see also R. Bulo et al., J.Am.Chem.Soc., 124 (2002) 13903-13910, note (29) \*\*\*

|                                                                                               | exact                | expectation value |                |              |
|-----------------------------------------------------------------------------------------------|----------------------|-------------------|----------------|--------------|
| Total S2 (S squared)                                                                          | 0.00000              | 1.00219           |                |              |
|                                                                                               | ----- hartree        | ----- eV          | ----- kcal/mol | ----- kJ/mol |
| <b>Pauli Repulsion</b>                                                                        |                      |                   |                |              |
| Kinetic (Delta T^0):                                                                          | 463.721470345604871  | 12618.5032        | 290989.65      | 1217500.55   |
| Delta V^Pauli Coulomb:                                                                        | -241.738801482909537 | -6578.0475        | -151693.40     | -634685.13   |
| Delta V^Pauli LDA-XC:                                                                         | -56.724651555483469  | -1543.5563        | -35595.26      | -148930.55   |
| Delta V^Pauli GGA-Exchange:                                                                   | 3.564568370725851    | 96.9968           | 2236.80        | 9358.77      |
| Delta V^Pauli GGA-Correlation:                                                                | -4.119455939330638   | -112.0961         | -2585.00       | -10815.63    |
| Total Pauli Repulsion:                                                                        | 164.703129738607089  | 4481.8002         | 103352.79      | 432428.01    |
| (Total Pauli Repulsion =<br>Delta E^Pauli in BB paper)                                        |                      |                   |                |              |
| <b>Steric Interaction</b>                                                                     |                      |                   |                |              |
| Pauli Repulsion (Delta E^Pauli):                                                              | 164.703129738607089  | 4481.8002         | 103352.79      | 432428.01    |
| Electrostatic Interaction:                                                                    | -36.044847607837021  | -980.8302         | -22618.49      | -94635.73    |
| (Electrostatic Interaction =<br>Delta V_elstat in the BB paper)                               |                      |                   |                |              |
| Total Steric Interaction:                                                                     | 128.658282130770061  | 3500.9700         | 80734.30       | 337792.27    |
| (Total Steric Interaction =<br>Delta E^0 in the BB paper)                                     |                      |                   |                |              |
| <b>Orbital Interactions</b>                                                                   |                      |                   |                |              |
| A:                                                                                            | -164.267147634955052 | -4469.9365        | -103079.20     | -431283.34   |
| Total Orbital Interactions:                                                                   | -164.267147634956729 | -4469.9365        | -103079.20     | -431283.34   |
| <b>Alternative Decomposition Orb.Int.</b>                                                     |                      |                   |                |              |
| Kinetic:                                                                                      | -426.934746704264171 | -11617.4856       | -267905.63     | -1120917.02  |
| Coulomb:                                                                                      | 239.810514081739257  | 6525.5761         | 150483.39      | 629622.42    |
| XC:                                                                                           | 22.857084987567962   | 621.9729          | 14343.04       | 60011.27     |
| Total Orbital Interactions:                                                                   | -164.267147634956956 | -4469.9365        | -103079.20     | -431283.34   |
| Residu (E=Steric+OrbInt+Res):                                                                 | -0.000006242299423   | -0.0002           | 0.00           | -0.02        |
| Dispersion Energy:                                                                            | -0.431364817230082   | -11.7380          | -270.69        | -1132.55     |
| Total Bonding Energy:                                                                         | -36.040236563716171  | -980.7047         | -22615.59      | -94623.63    |
| <b>Summary of Bonding Energy (energy terms are taken from the energy decomposition above)</b> |                      |                   |                |              |
| Electrostatic Energy:                                                                         | -36.044847607837021  | -980.8302         | -22618.49      | -94635.73    |
| Kinetic Energy:                                                                               | 36.786723641340700   | 1001.0177         | 23084.02       | 96583.53     |
| Coulomb (Steric+OrbInt) Energy:                                                               | -1.928293643469715   | -52.4715          | -1210.02       | -5062.73     |
| XC Energy:                                                                                    | -34.422454136520287  | -936.6826         | -21600.42      | -90376.14    |
| Dispersion Energy:                                                                            | -0.431364817230082   | -11.7380          | -270.69        | -1132.55     |
| Total Bonding Energy:                                                                         | -36.040236563716405  | -980.7047         | -22615.59      | -94623.63    |
